# Supplementary material for: Selective homo- and cross-desilacoupling of aryl and benzyl primary silanes catalyzed by a barium complex
Source: Royal Society of Chemistry journal article supplement (doi:10.1039/d0dt01158d), 2020-01-01
Supplement: d0dt01158d1.pdf [file d0dt01158d1.pdf]

---

## SUPPORTING INFORMATION

---

### Selective Homo- and Cross-Desilacoupling of Aryl and Benzyl Primary Silanes Catalyzed by Barium Complex

Zhizhou Liu,<sup>[a][b]</sup> Xianghui Shi,<sup>[a]</sup> and Jianhua Cheng<sup>\*[a][b]</sup>

[a] State Key Laboratory of Polymer Physics and Chemistry

Changchun Institute of Applied Chemistry

Chinese Academy of Sciences

No. 5625, Renmin Street, Changchun 130022 (China)

E-mail: jhcheng@ciac.ac.cn

[b] University of Science and Technology of China

Hefei, Anhui 230029 (China)

**Contents**

1. Selected NMR spectra

**Page**

S3

## Selected NMR spectra

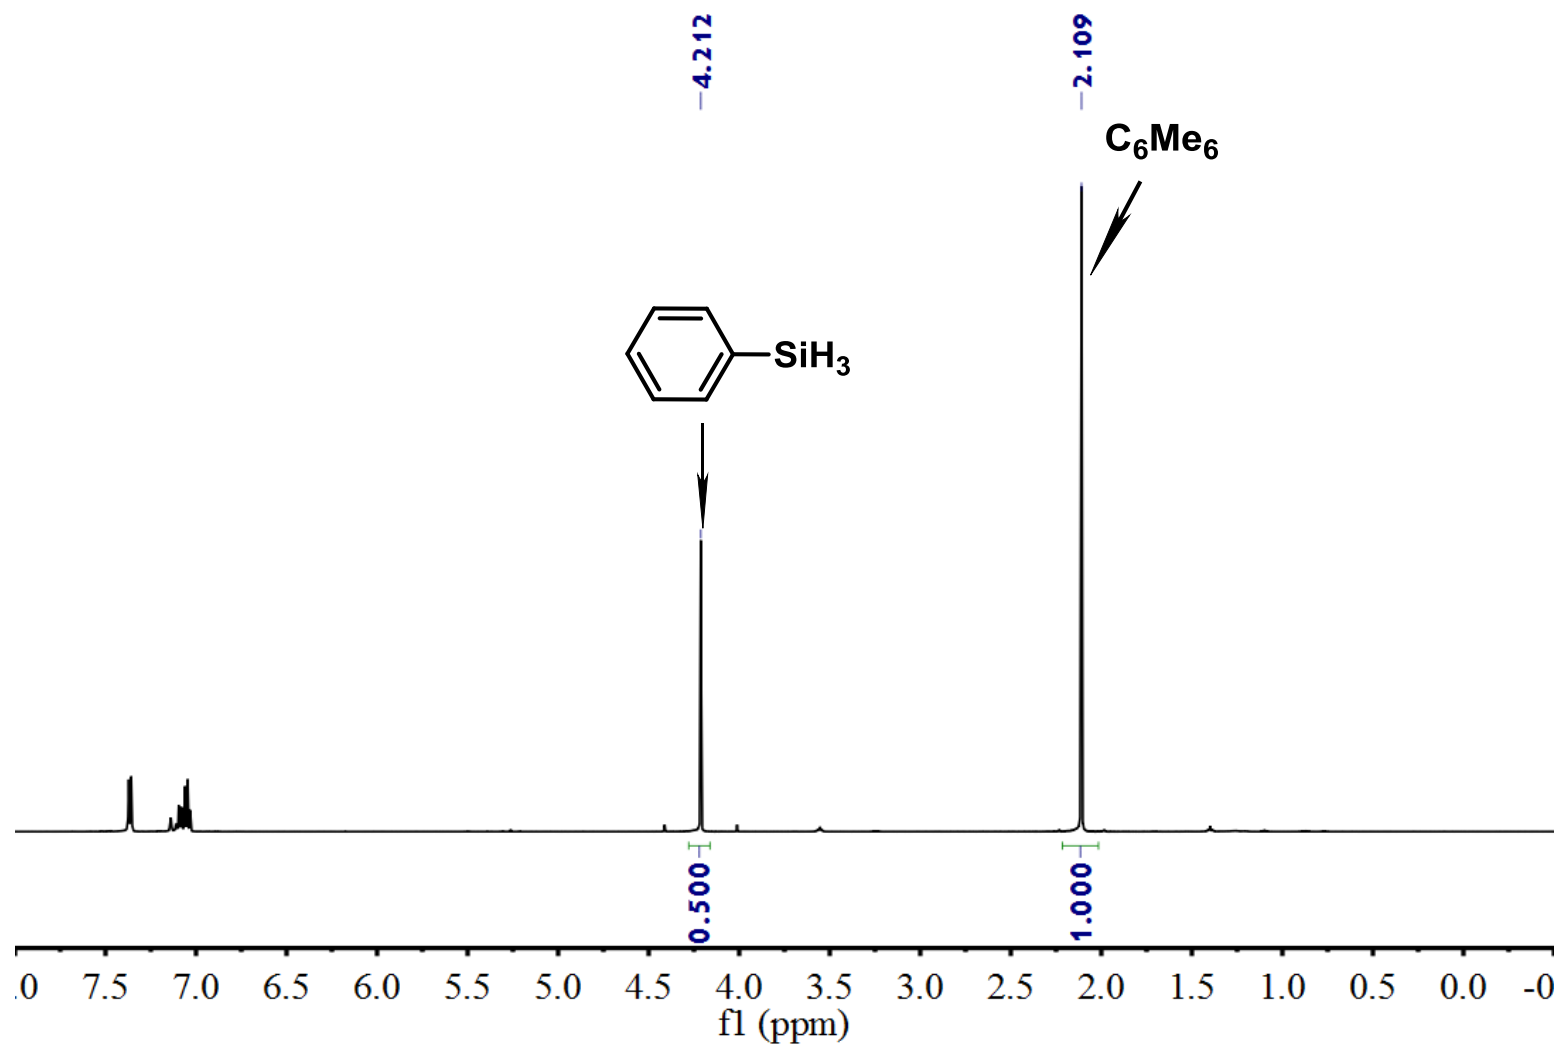

**Figure S1.** Quantitative  $^1\text{H}$  NMR spectrum of the  $\text{C}_6\text{D}_6$  solution of  $\text{PhSiH}_3$  for the catalytic redistribution study with hexamethylbenzene as the internal standard (500 MHz,  $\text{C}_6\text{D}_6$ , 25  $^\circ\text{C}$ ).

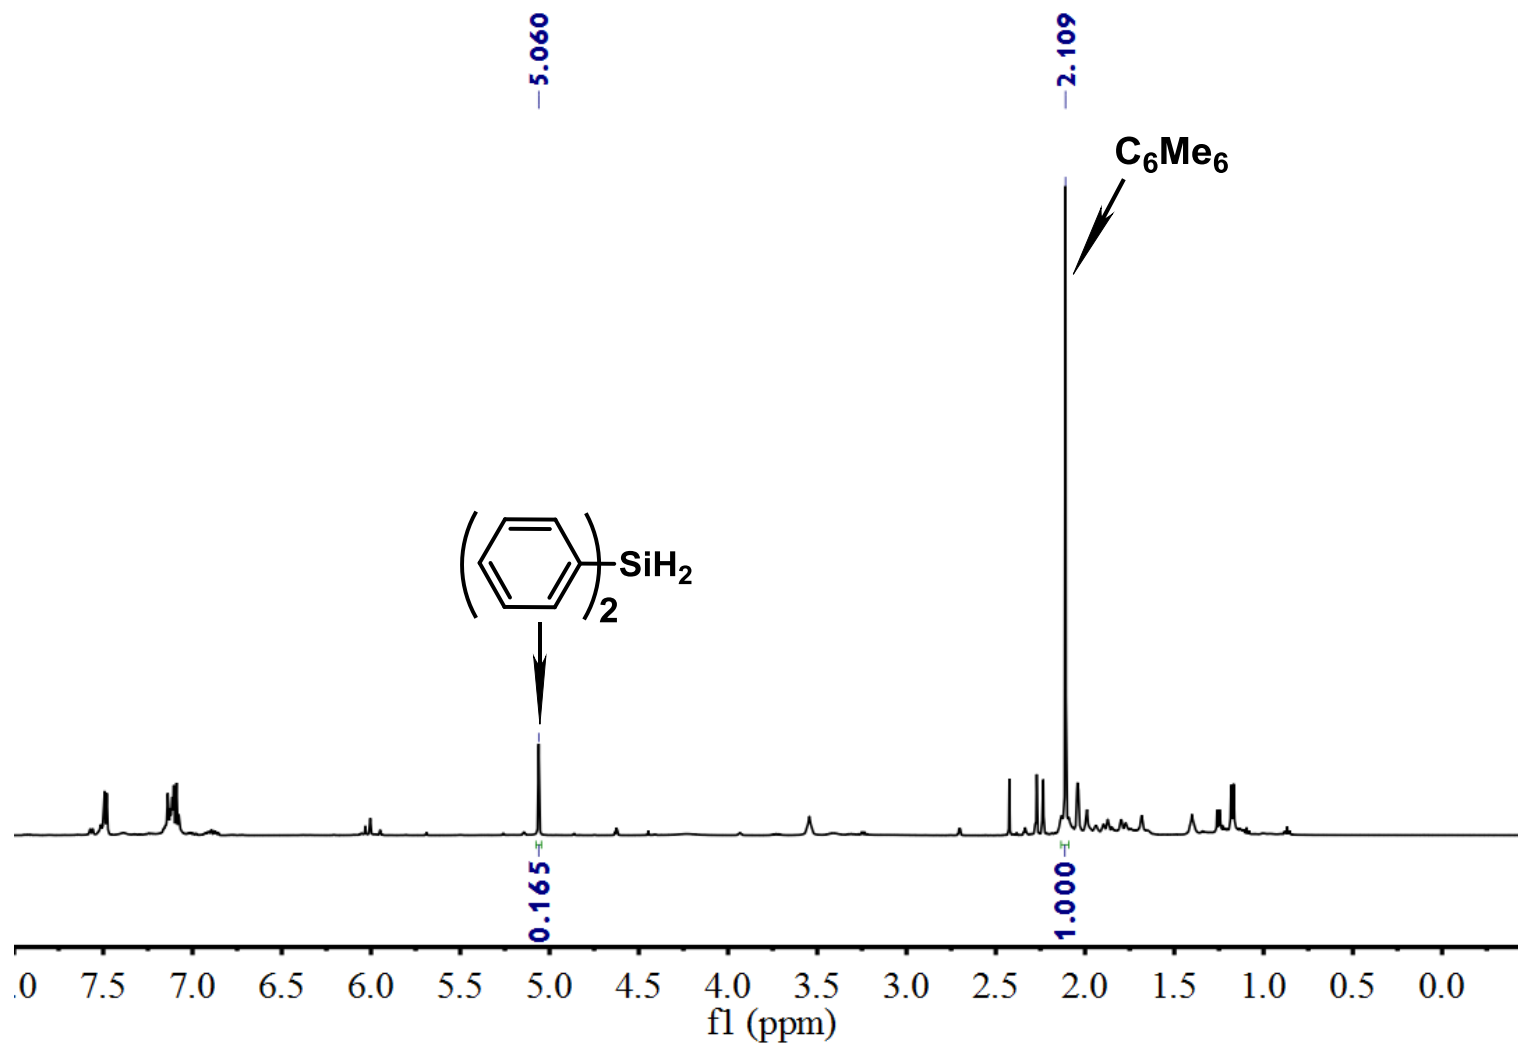

**Figure S2.** Quantitative  $^1\text{H}$  NMR spectrum of the products of redistribution of  $\text{PhSiH}_3$  catalyzed by 5 mol% of **1** at r.t. in 10 min (Table 1, entry 1) (500 MHz,  $\text{C}_6\text{D}_6$ , 25  $^\circ\text{C}$ ).

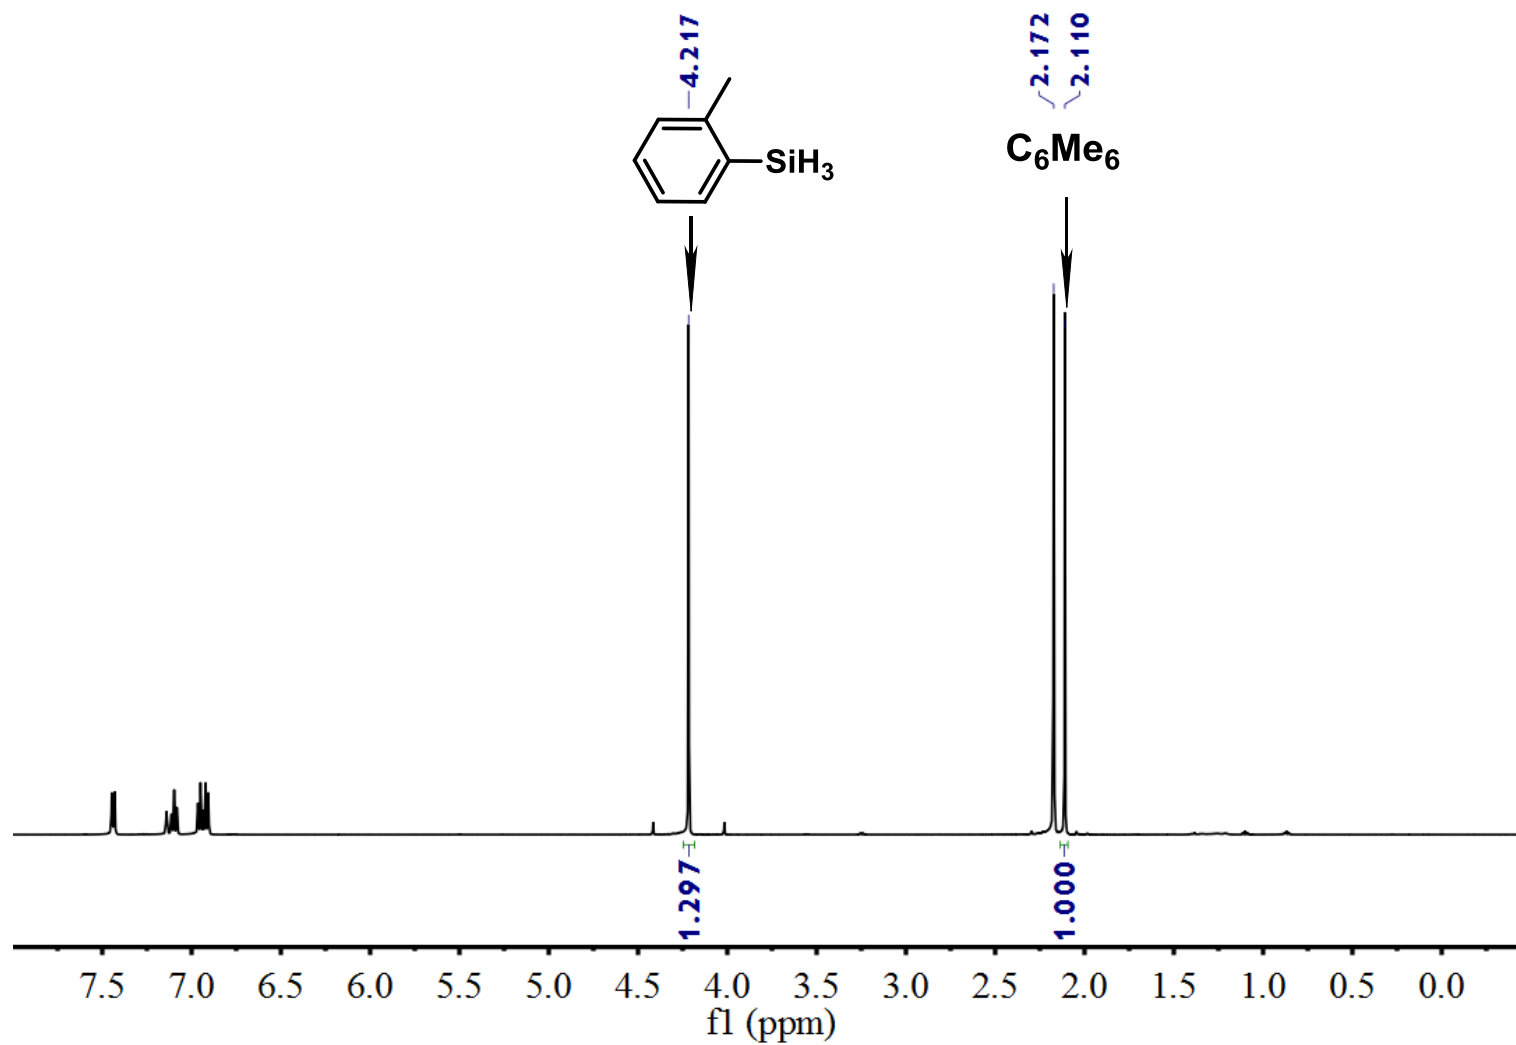

**Figure S3.** Quantitative <sup>1</sup>H NMR spectrum of the C<sub>6</sub>D<sub>6</sub> solution of 2-Me-PhSiH<sub>3</sub> for the catalytic redistribution study with hexamethylbenzene as the internal standard (500 MHz, C<sub>6</sub>D<sub>6</sub>, 25 °C).

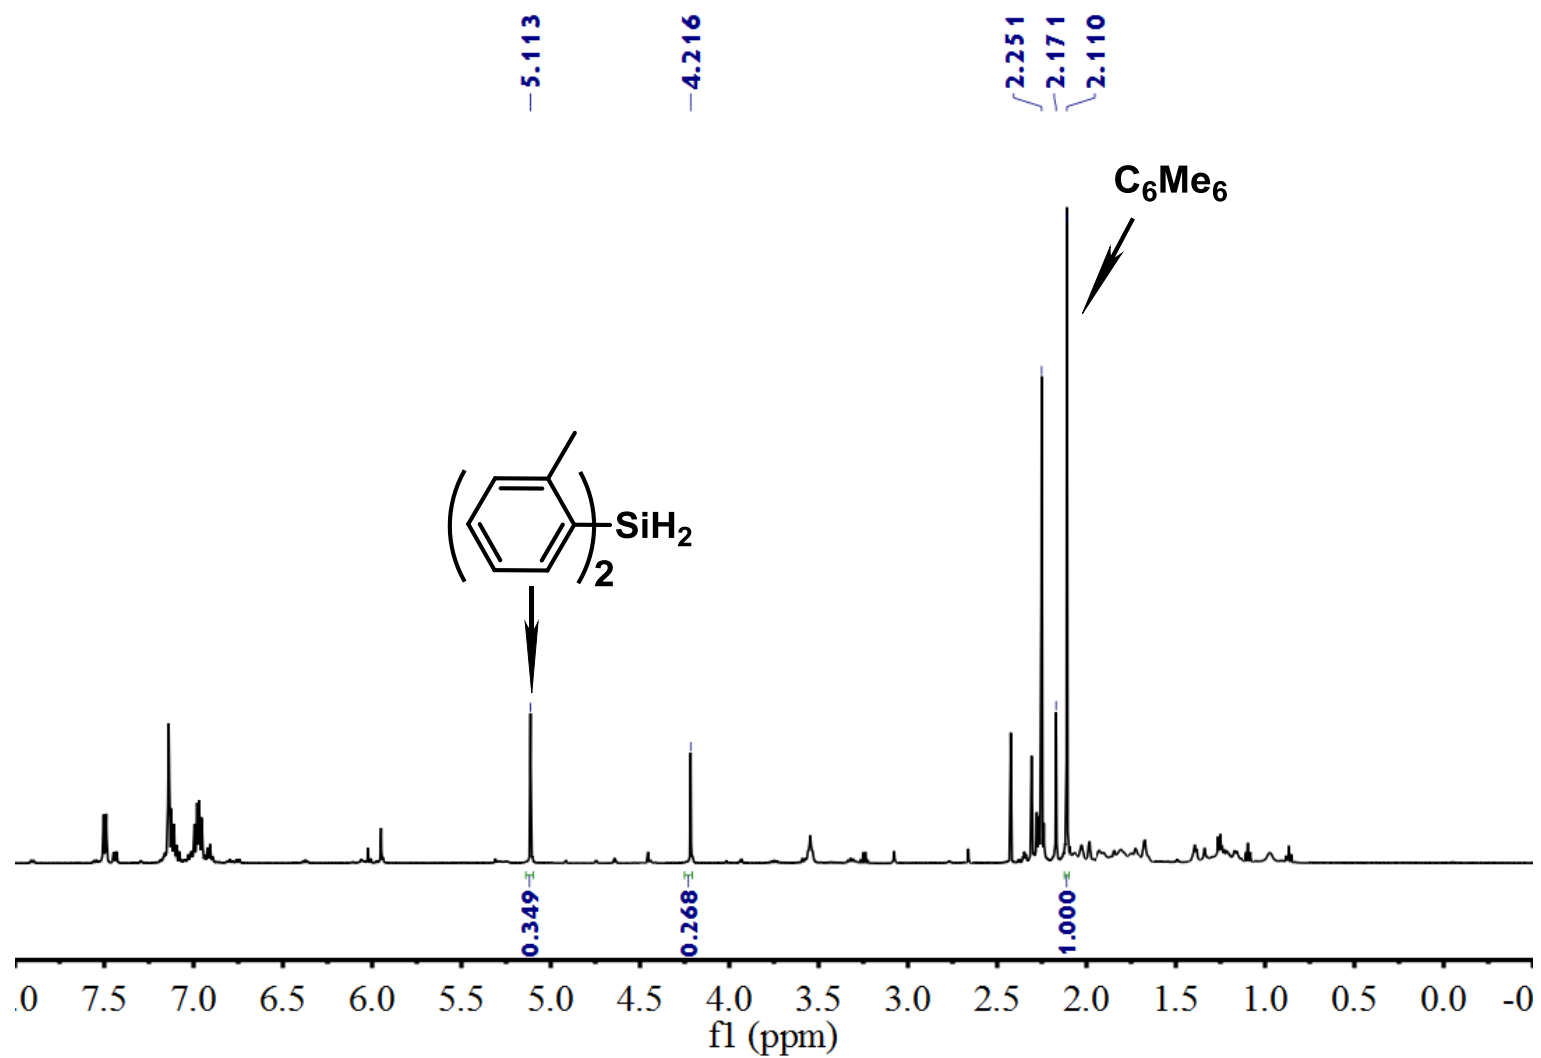

**Figure S4.** Quantitative  $^1\text{H}$  NMR spectrum of the products of redistribution of 2-Me-PhSiH<sub>3</sub> catalyzed by 5 mol% of **1** at r.t. in 10 min (Table 1, entry 2) (500 MHz, C<sub>6</sub>D<sub>6</sub>, 25 °C).

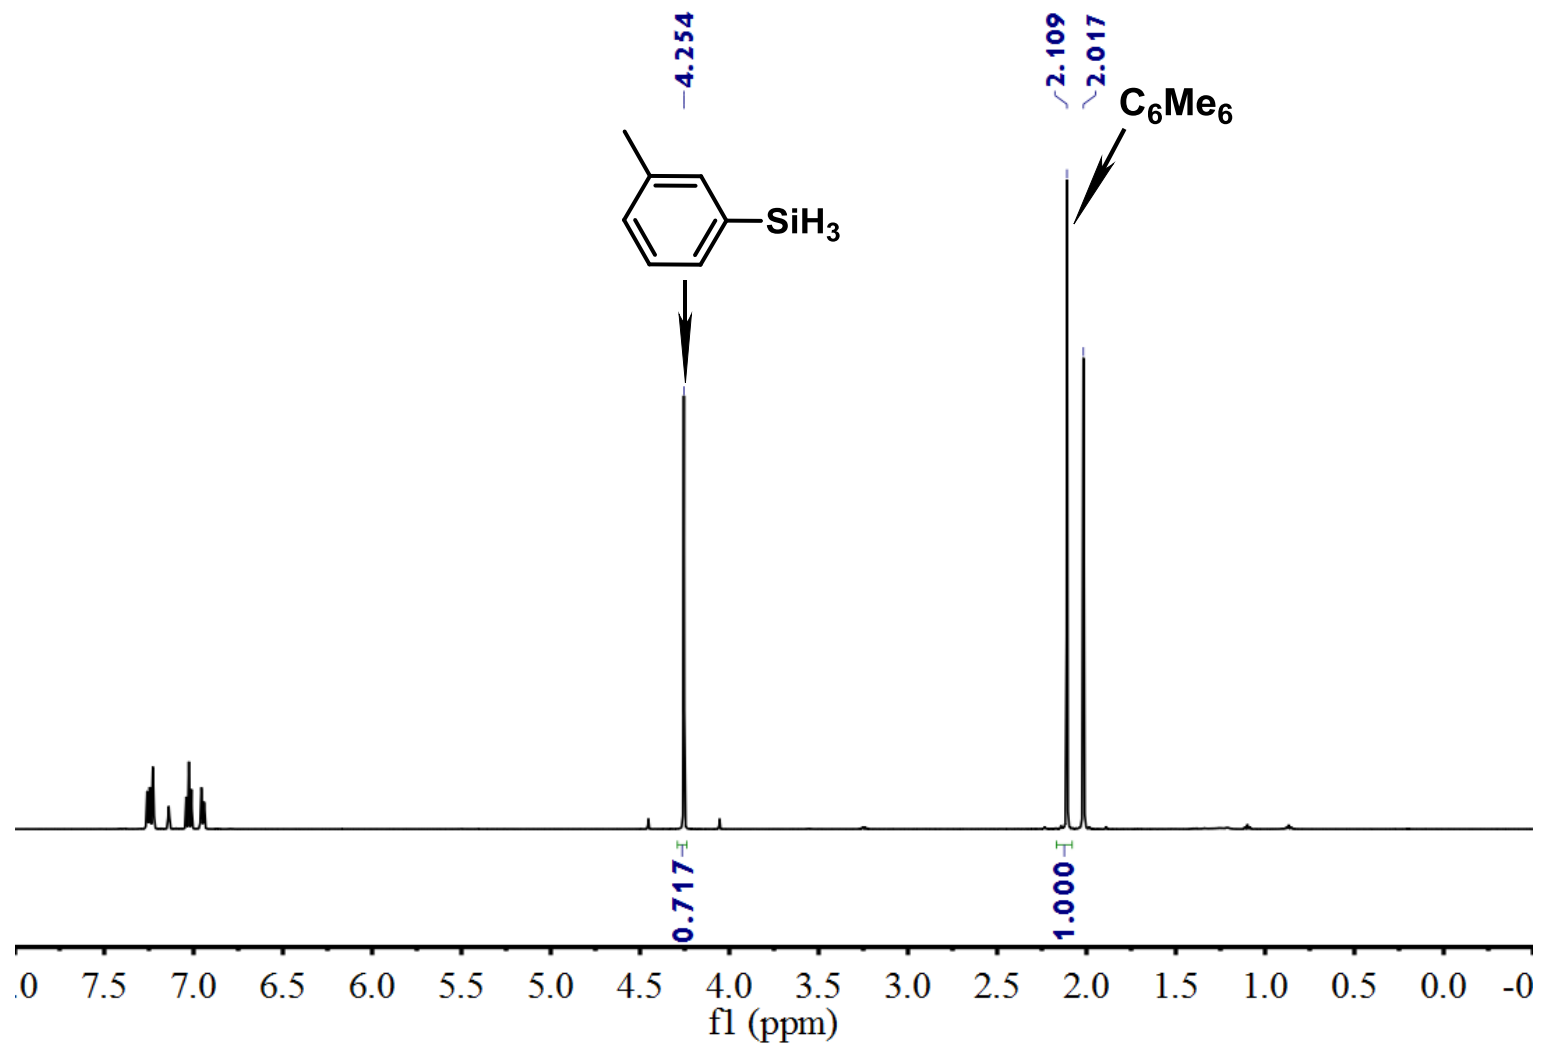

**Figure S5.** Quantitative <sup>1</sup>H NMR spectrum of the C<sub>6</sub>D<sub>6</sub> solution of 3-Me-PhSiH<sub>3</sub> for the catalytic redistribution study with hexamethylbenzene as the internal standard (500 MHz, C<sub>6</sub>D<sub>6</sub>, 25 °C).

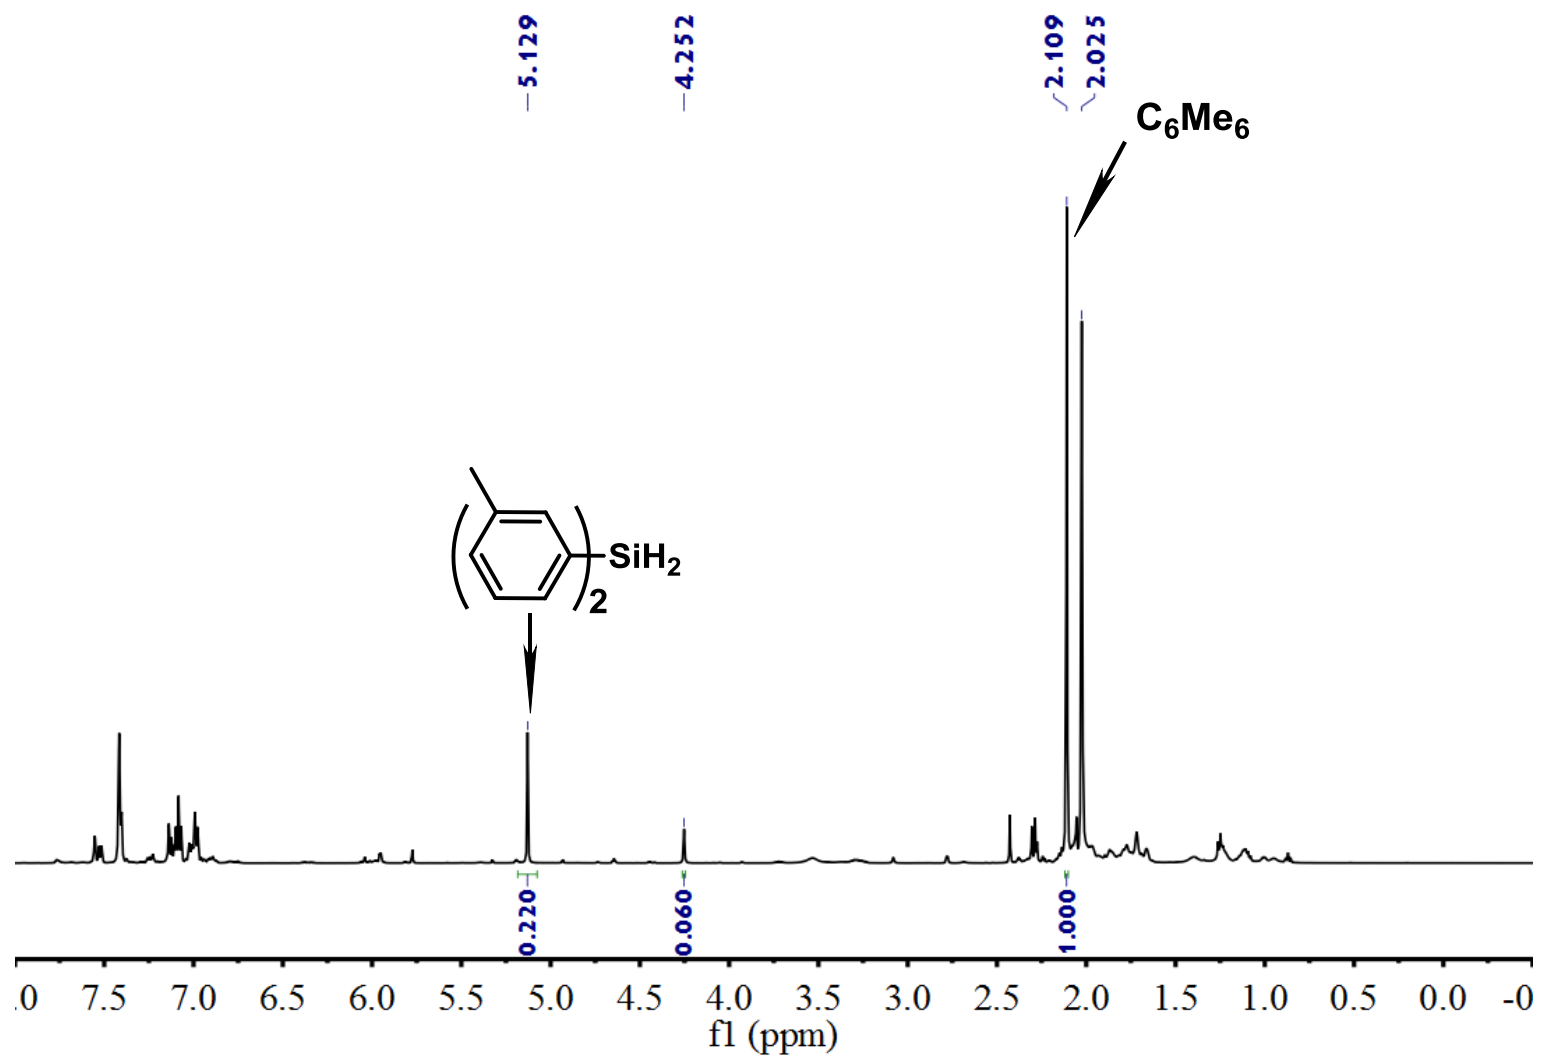

**Figure S6.** Quantitative  $^1\text{H}$  NMR spectrum of the products of redistribution of 3-Me-PhSiH<sub>3</sub> catalyzed by 5 mol% of **1** at r.t. in 10 min (Table 1, entry 3) (500 MHz, C<sub>6</sub>D<sub>6</sub>, 25 °C).



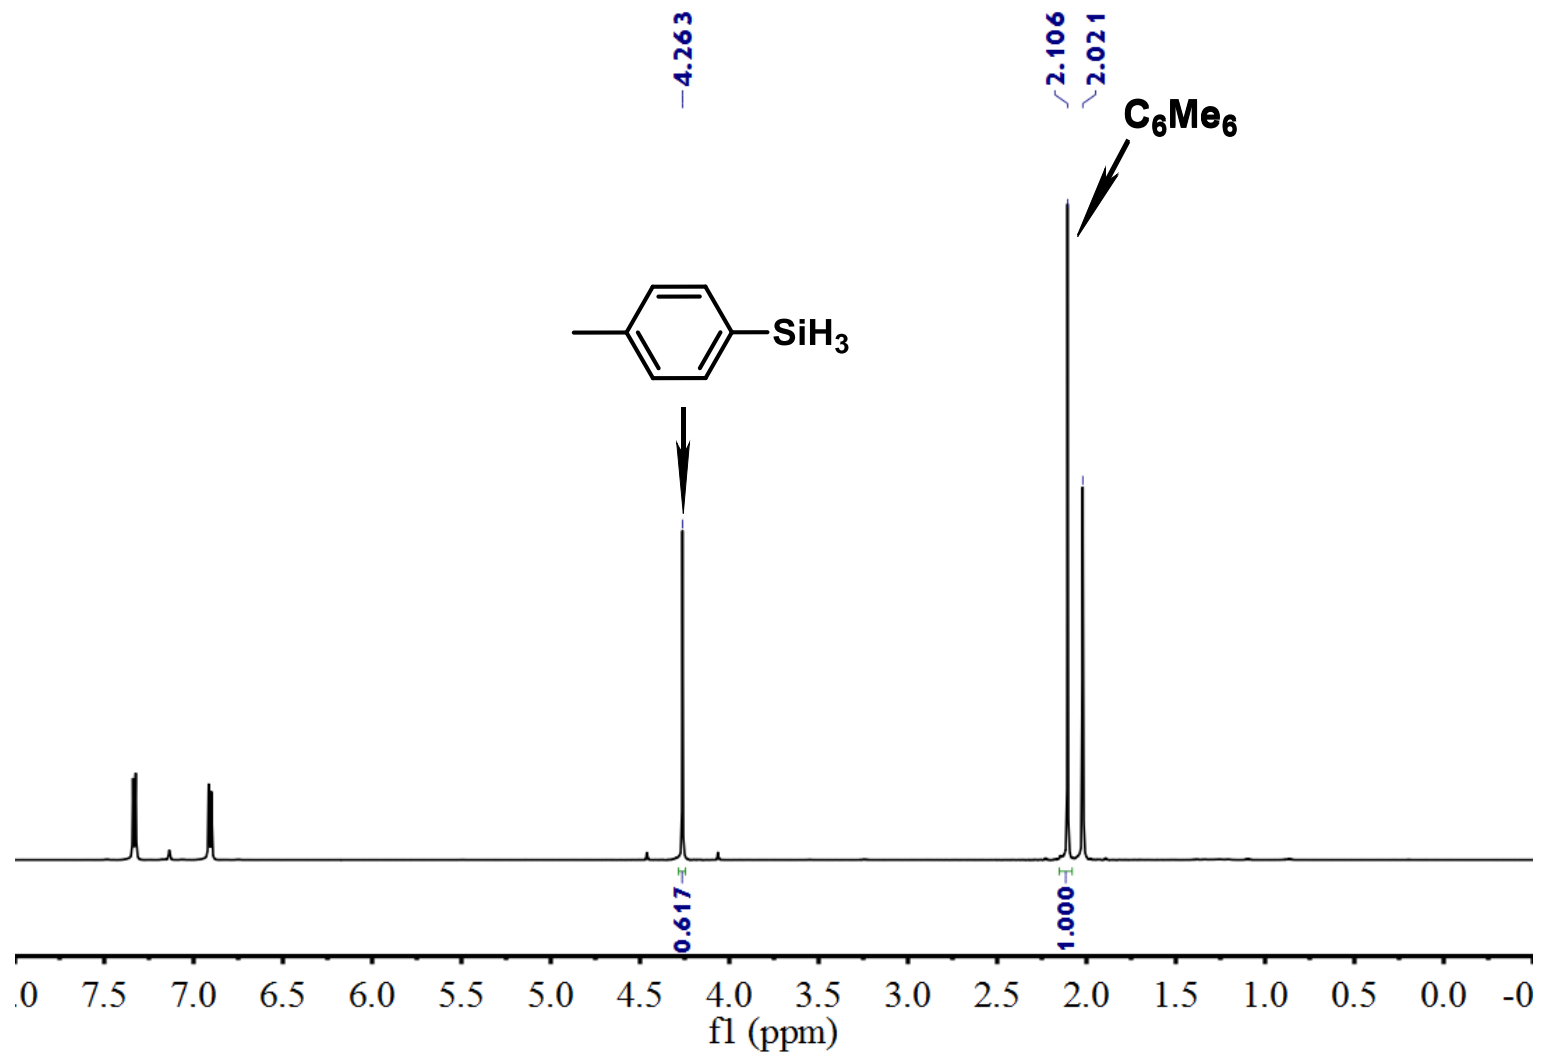

**Figure S7.** Quantitative  $^1\text{H}$  NMR spectrum of the  $\text{C}_6\text{D}_6$  solution of 4-Me-PhSiH $_3$  for the catalytic redistribution study with hexamethylbenzene as the internal standard (500 MHz,  $\text{C}_6\text{D}_6$ , 25  $^\circ\text{C}$ ).

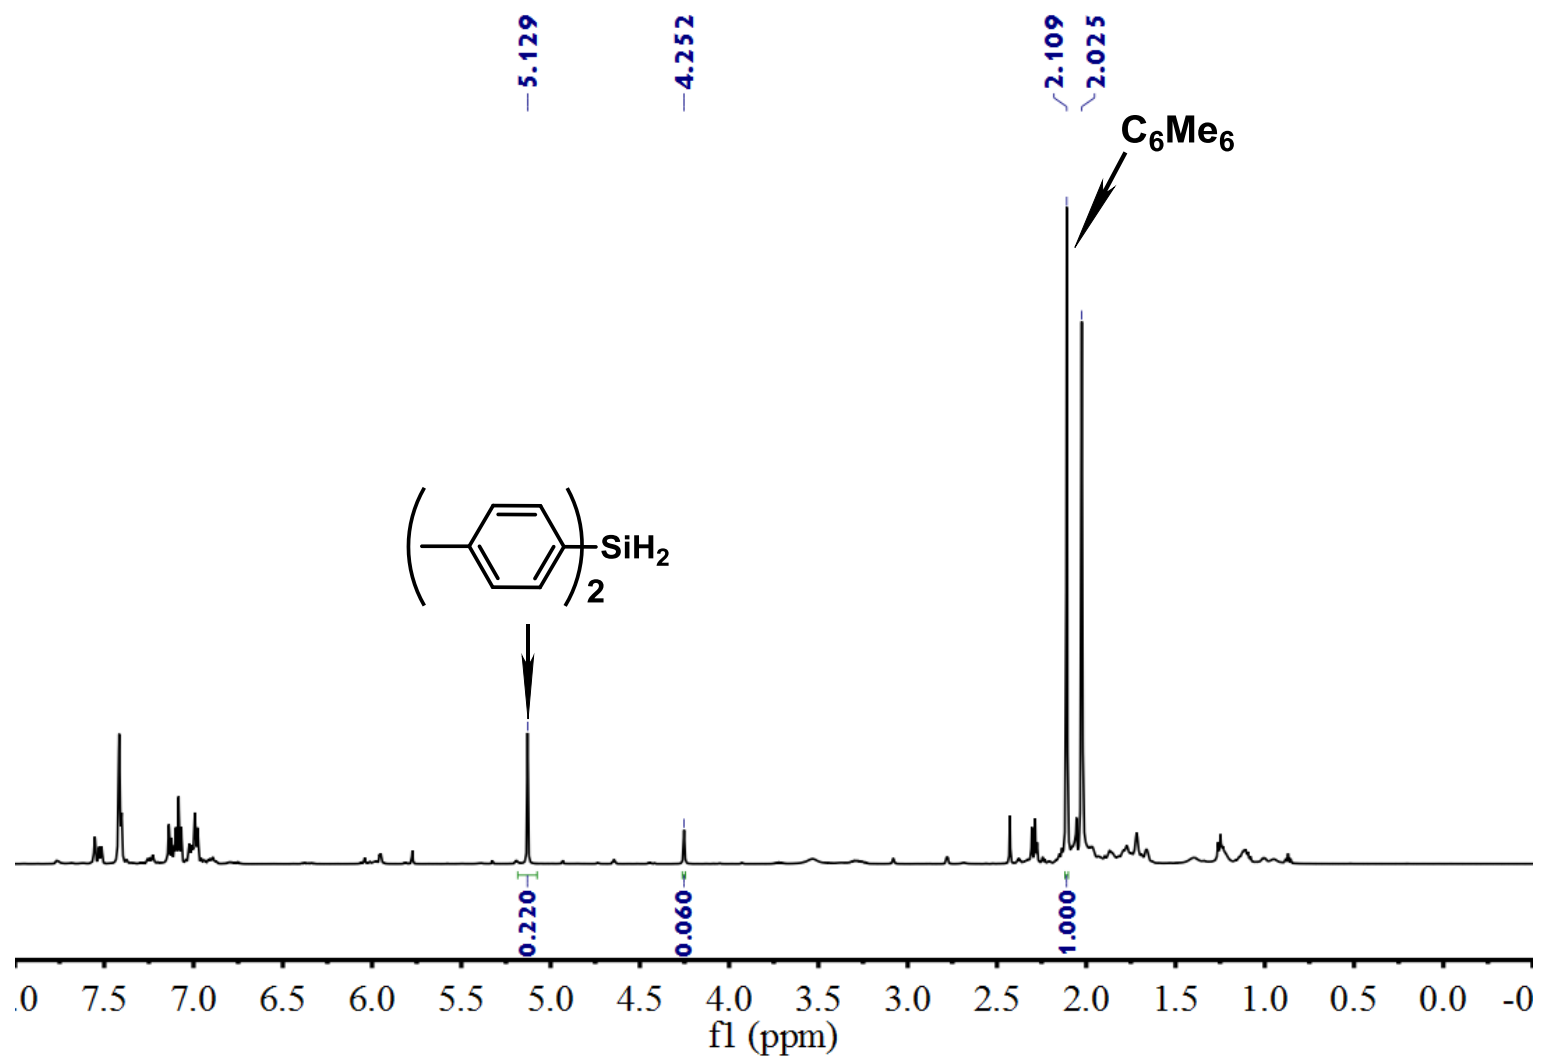

**Figure S8.** Quantitative  $^1\text{H}$  NMR spectrum of the products of redistribution of 4-Me-PhSiH<sub>3</sub> catalyzed by 5 mol% of **1** at r.t. in 10 min (Table 1, entry 4) (500 MHz, C<sub>6</sub>D<sub>6</sub>, 25 °C).

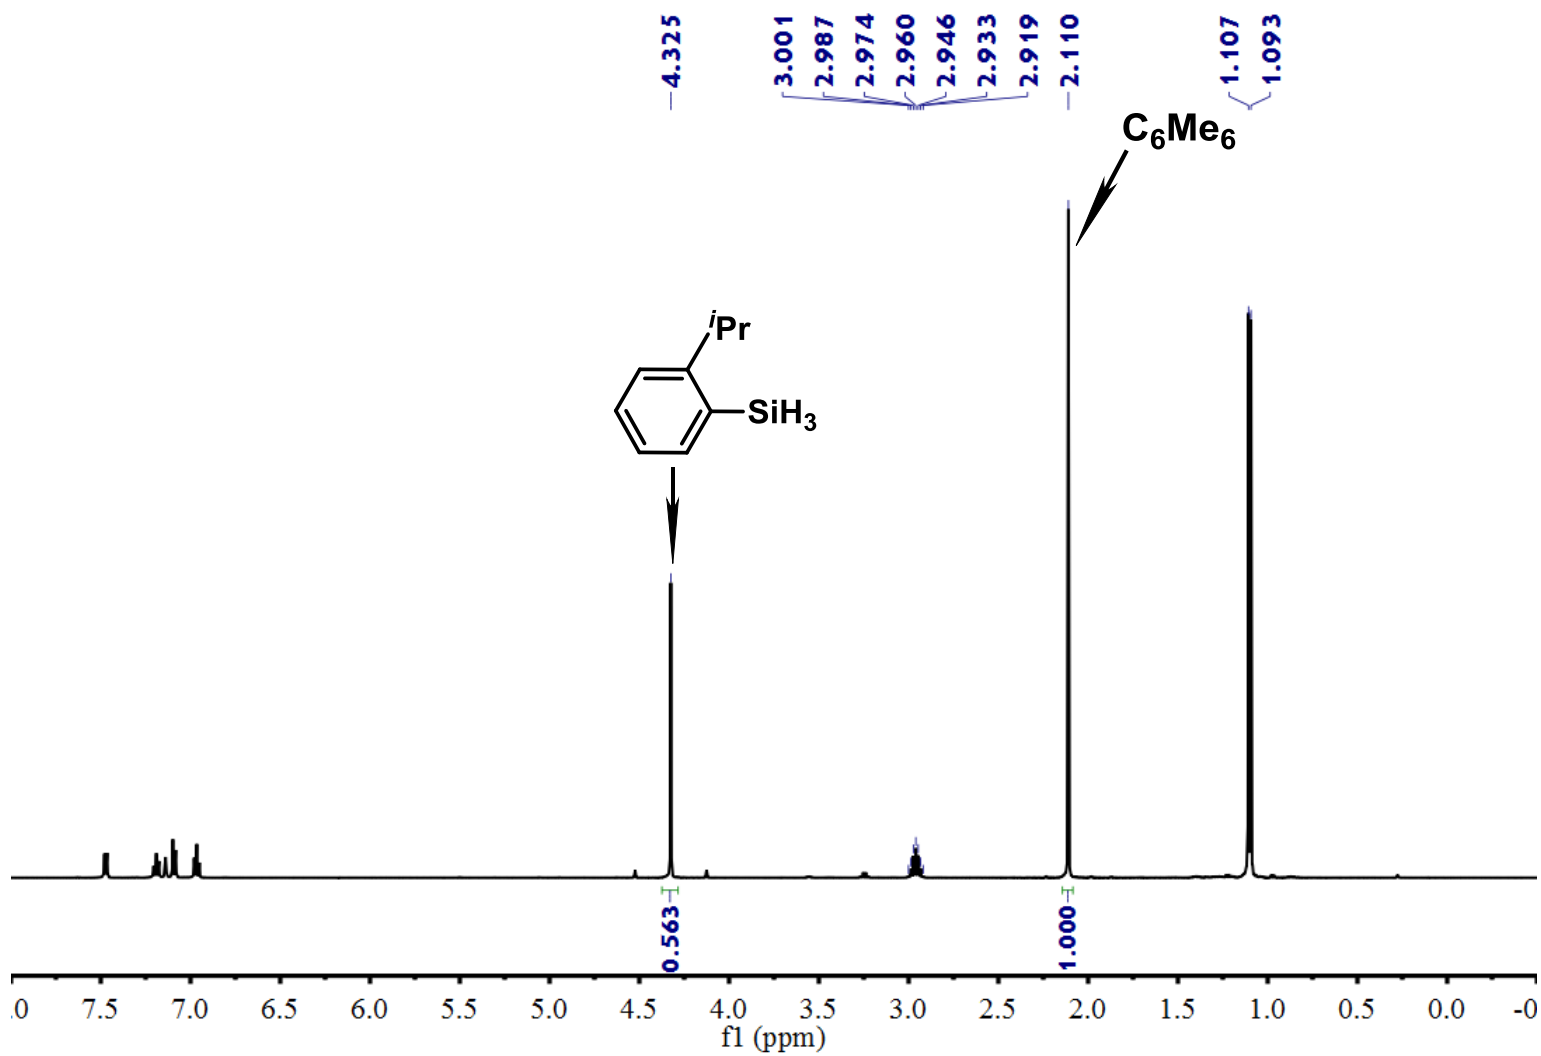

**Figure S9.** Quantitative  $^1\text{H}$  NMR spectrum of the  $\text{C}_6\text{D}_6$  solution of 2-*i*Pr-PhSiH $_3$  for the catalytic redistribution study with hexamethylbenzene as the internal standard (500 MHz,  $\text{C}_6\text{D}_6$ , 25  $^\circ\text{C}$ ).

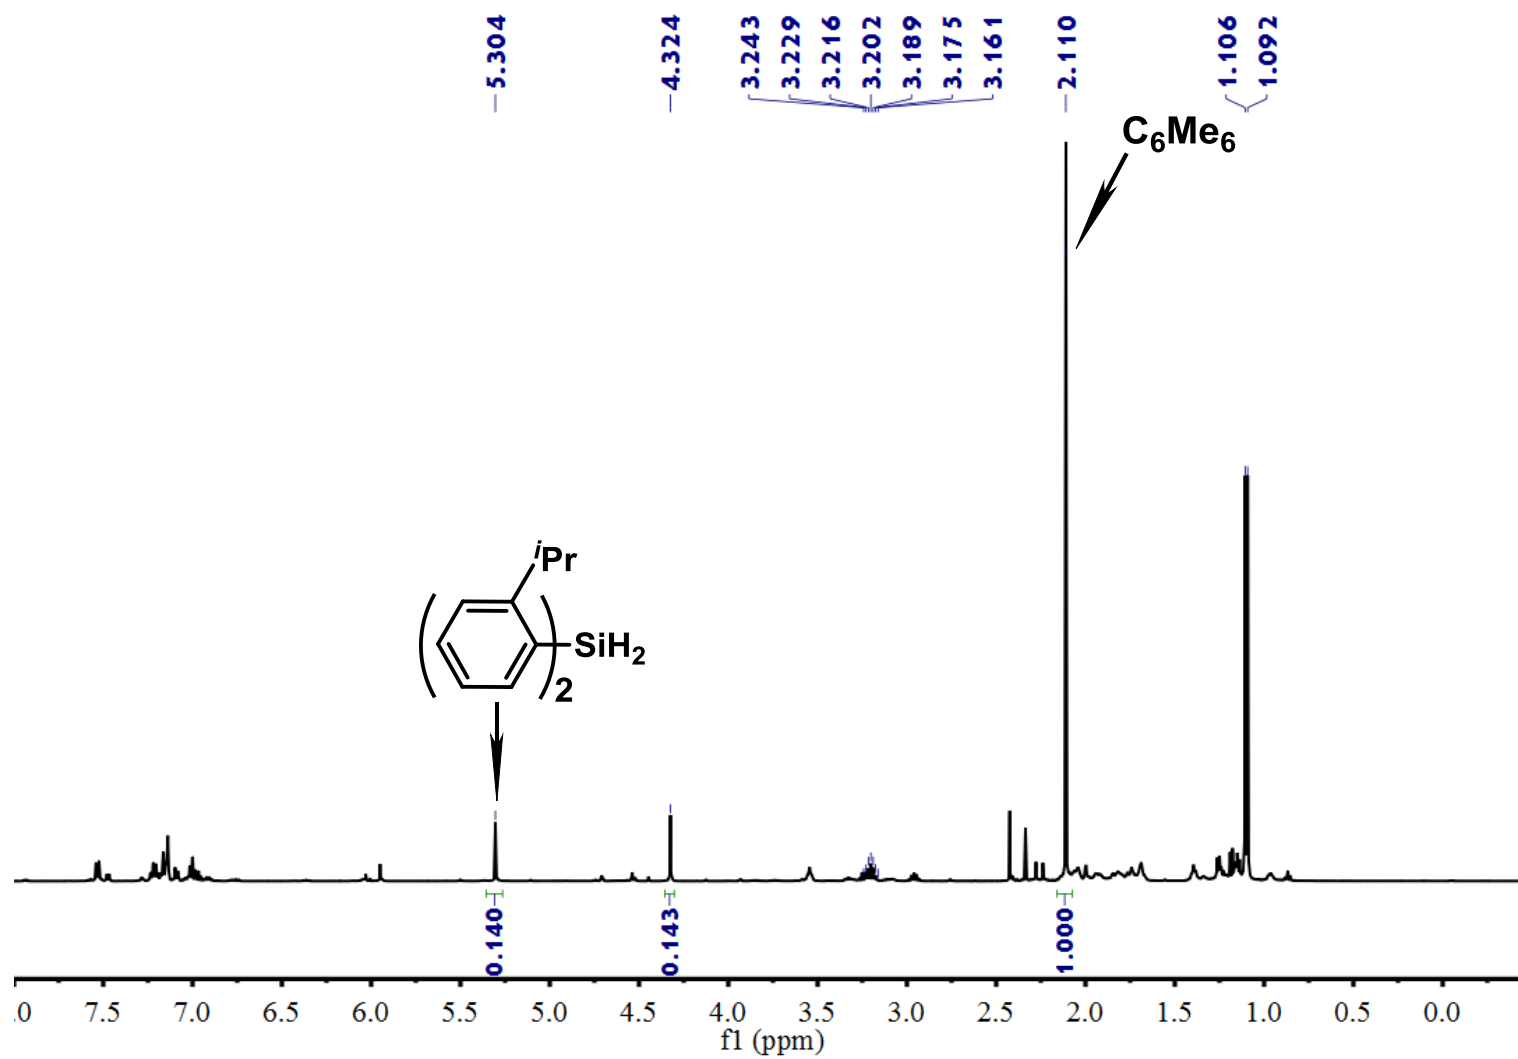

**Figure S10.** Quantitative <sup>1</sup>H NMR spectrum of the products of redistribution of 2-*i*Pr-PhSiH<sub>3</sub> catalyzed by 5 mol% of **1** at r.t. in 10 min (Table 1, entry 5) (500 MHz, C<sub>6</sub>D<sub>6</sub>, 25 °C).

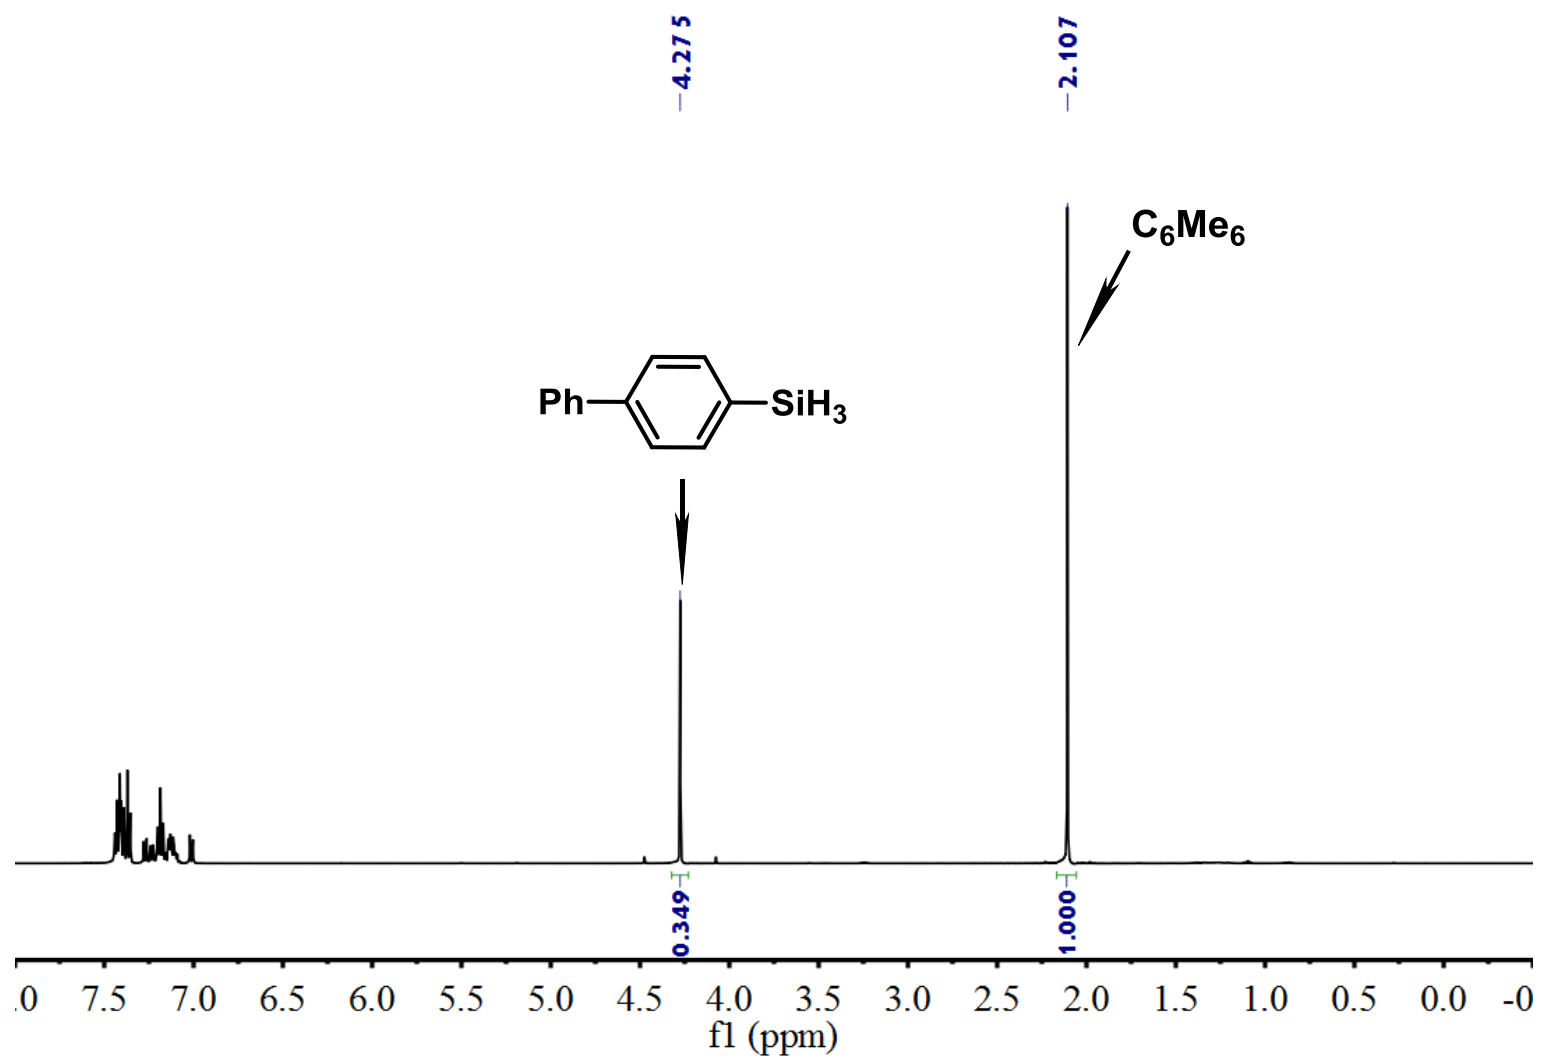

**Figure S11.** Quantitative  $^1\text{H}$  NMR spectrum of the  $\text{C}_6\text{D}_6$  solution of 4-Ph-PhSiH<sub>3</sub> for the catalytic redistribution study with hexamethylbenzene as the internal standard (500 MHz,  $\text{C}_6\text{D}_6$ , 25 °C).

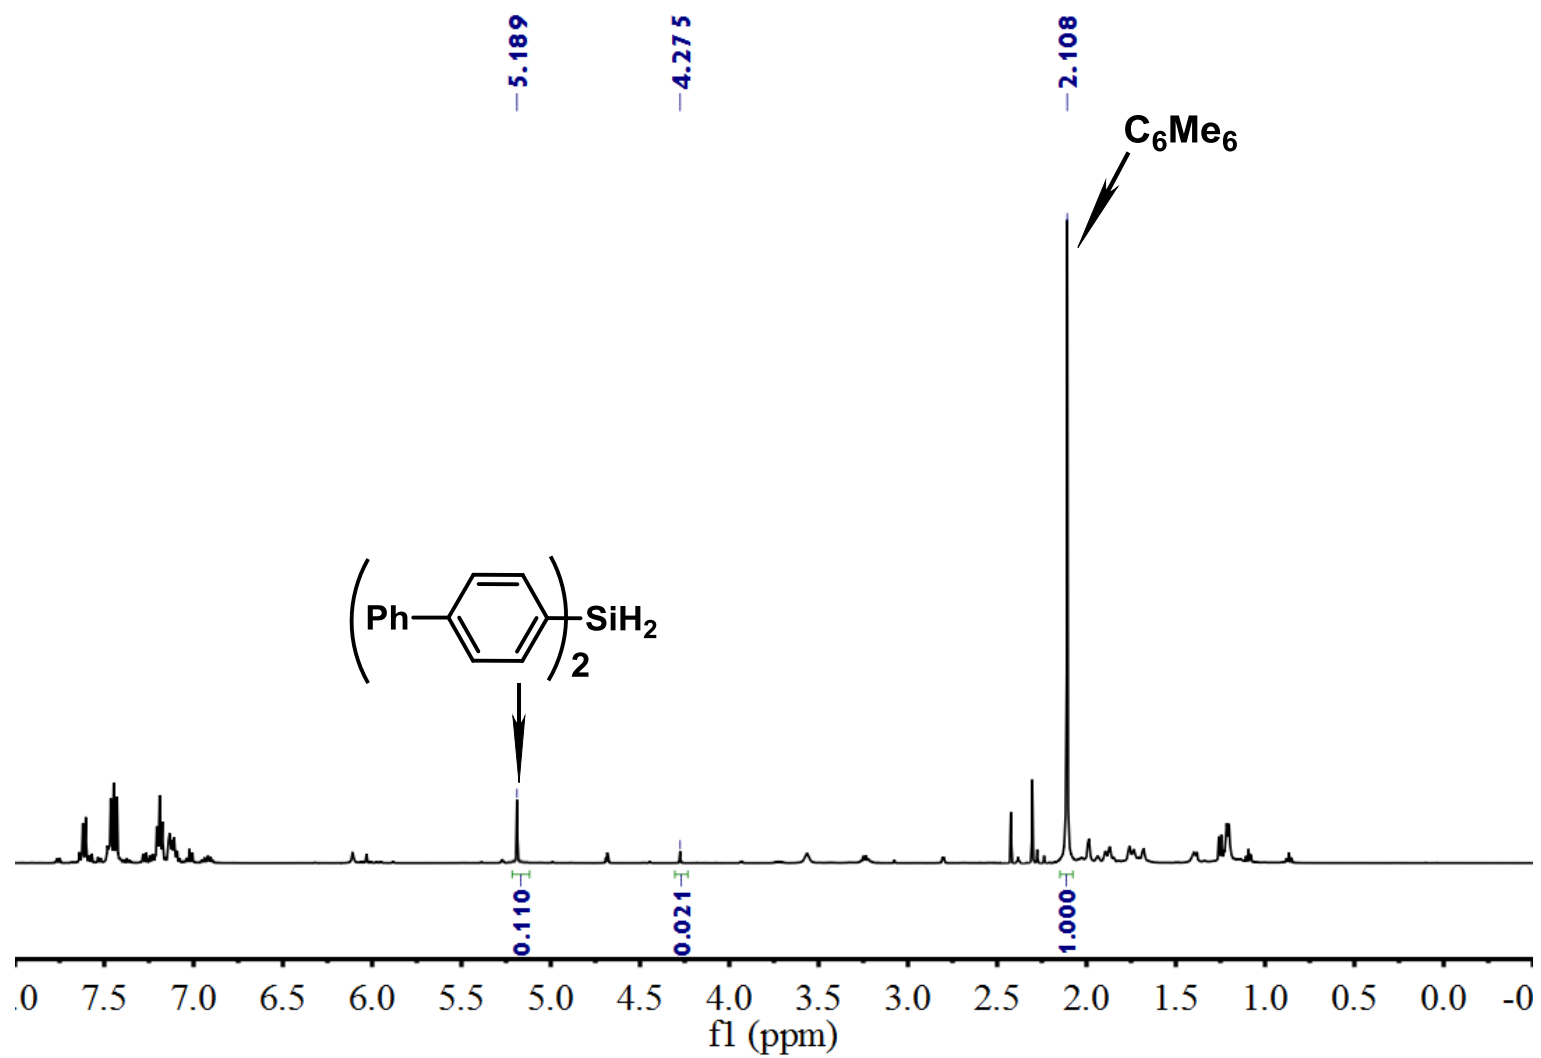

**Figure S12.** Quantitative  $^1\text{H}$  NMR spectrum of the products of redistribution of 4-Ph-PhSiH<sub>3</sub> catalyzed by 5 mol% of **1** at r.t. in 10 min (Table 1, entry 7) (500 MHz, C<sub>6</sub>D<sub>6</sub>, 25 °C).

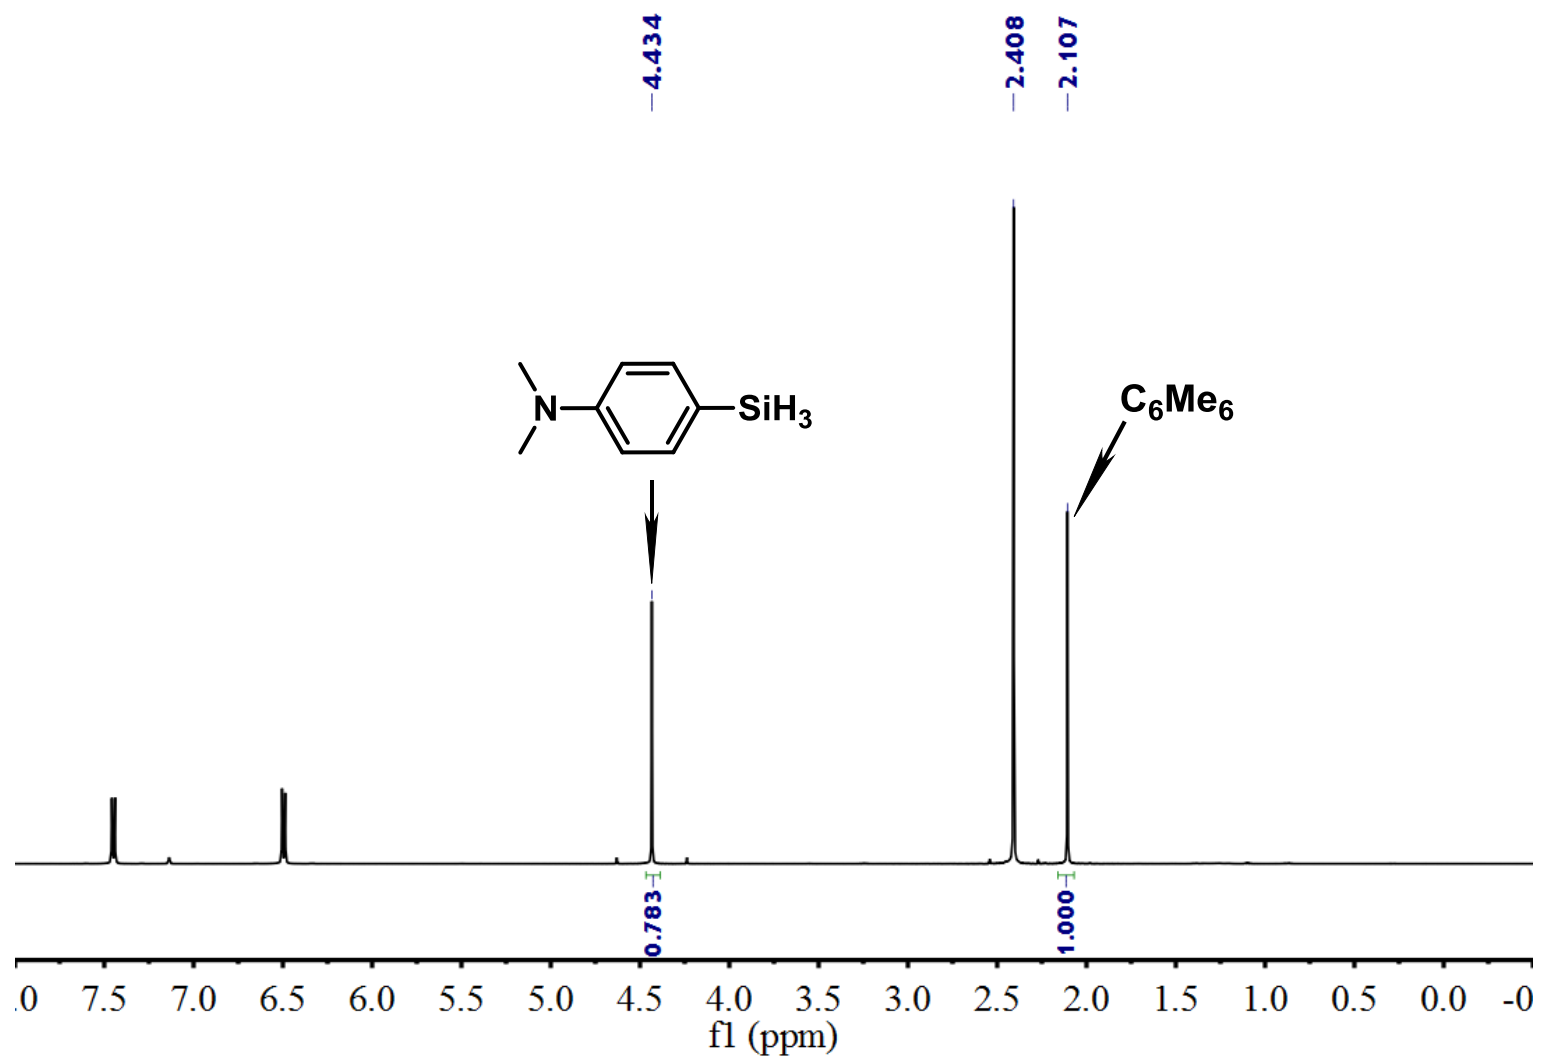

**Figure S13.** Quantitative  $^1\text{H}$  NMR spectrum of the  $\text{C}_6\text{D}_6$  solution of 4-NMe<sub>2</sub>-PhSiH<sub>3</sub> for the catalytic redistribution study with hexamethylbenzene as the internal standard (500 MHz,  $\text{C}_6\text{D}_6$ , 25 °C).

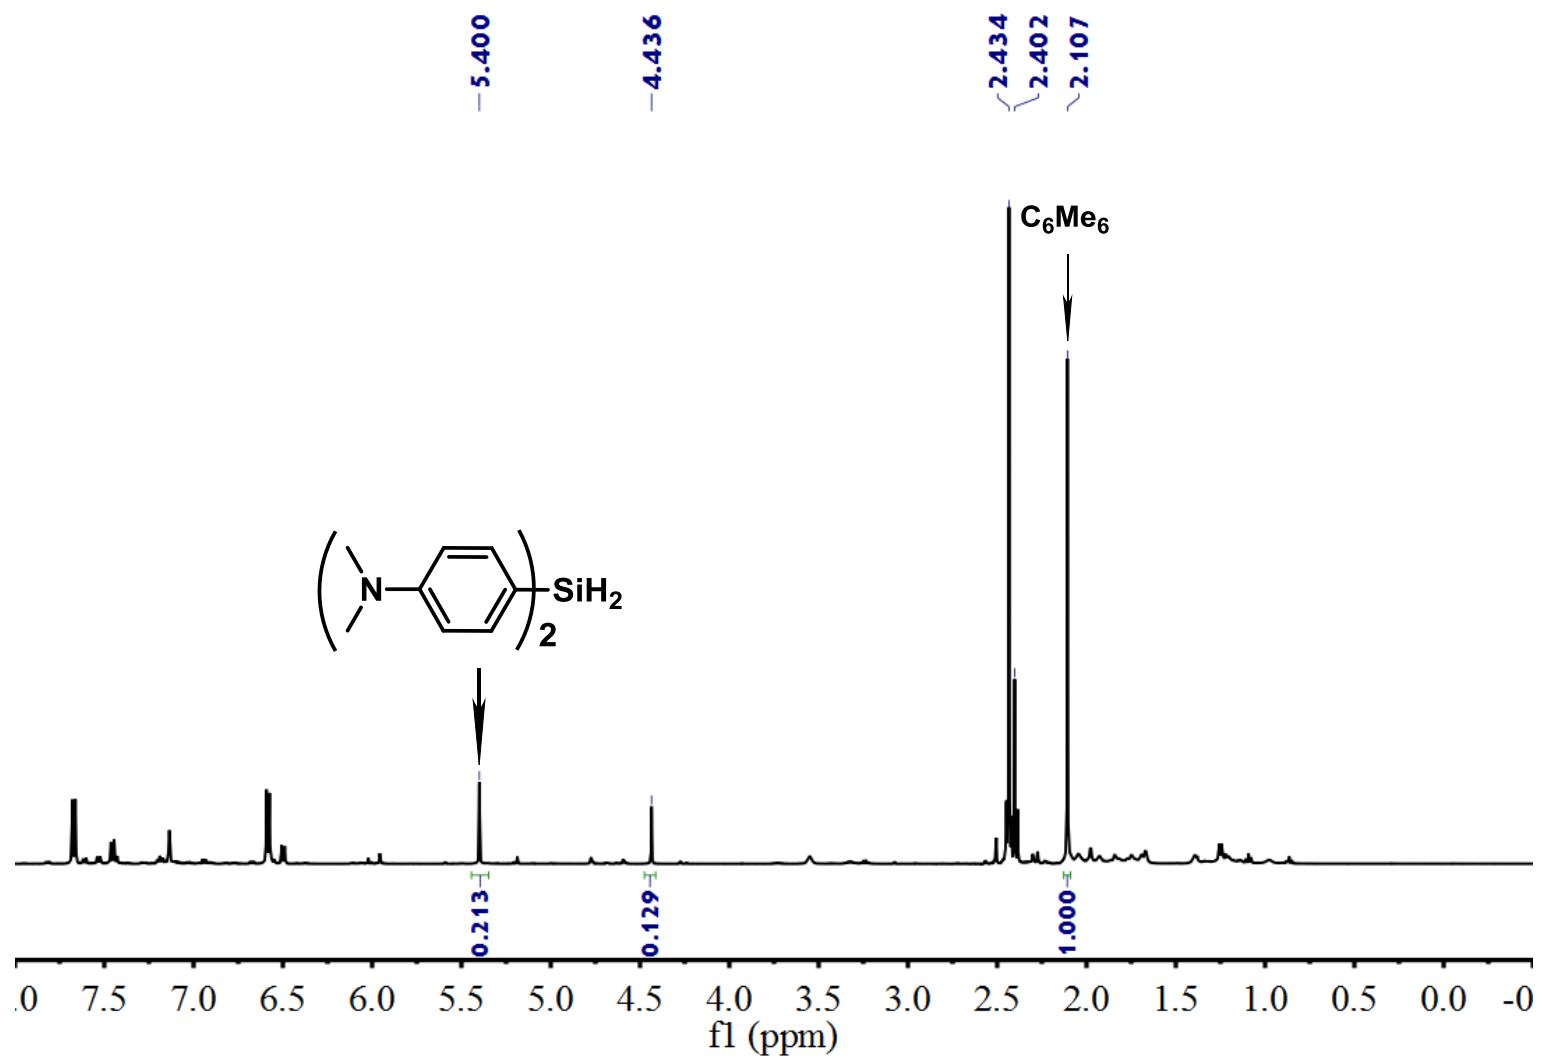

**Figure S14.** Quantitative <sup>1</sup>H NMR spectrum of the products of redistribution of 4-NMe<sub>2</sub>-PhSiH<sub>3</sub> catalyzed by 5 mol% of **1** at r.t. in 10 min (Table 1, entry 8) (500 MHz, C<sub>6</sub>D<sub>6</sub>, 25 °C).



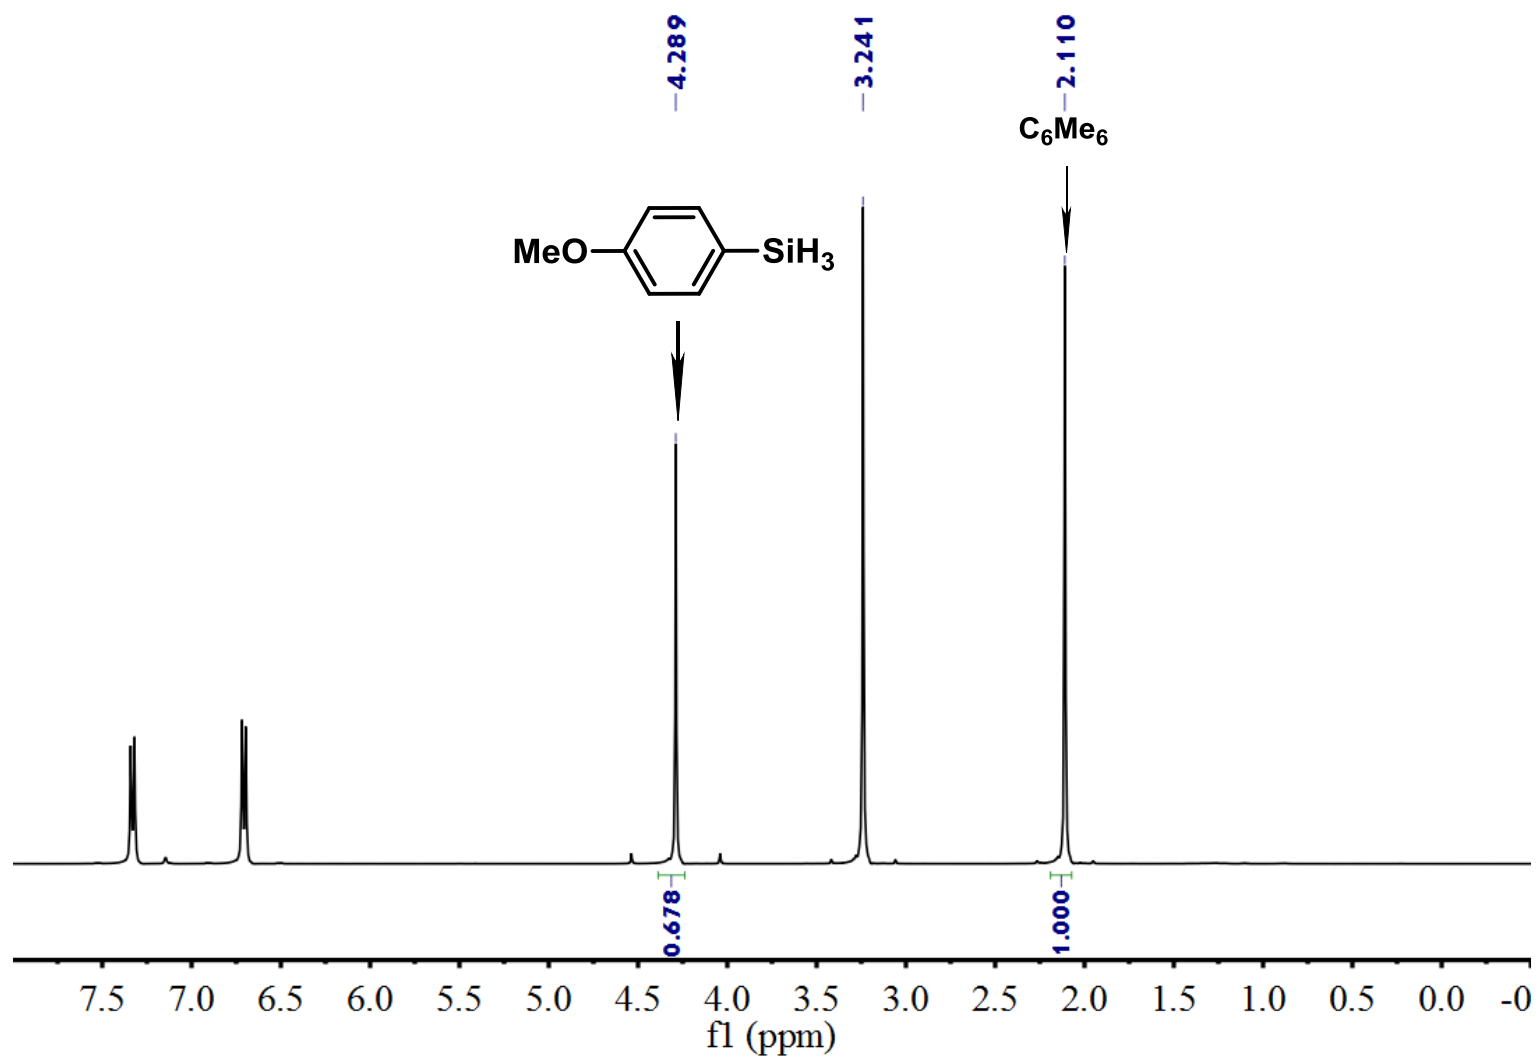

**Figure S15.** Quantitative <sup>1</sup>H NMR spectrum of the C<sub>6</sub>D<sub>6</sub> solution of 4-MeO-PhSiH<sub>3</sub> for the catalytic redistribution study with hexamethylbenzene as the internal standard (500 MHz, C<sub>6</sub>D<sub>6</sub>, 25 °C).

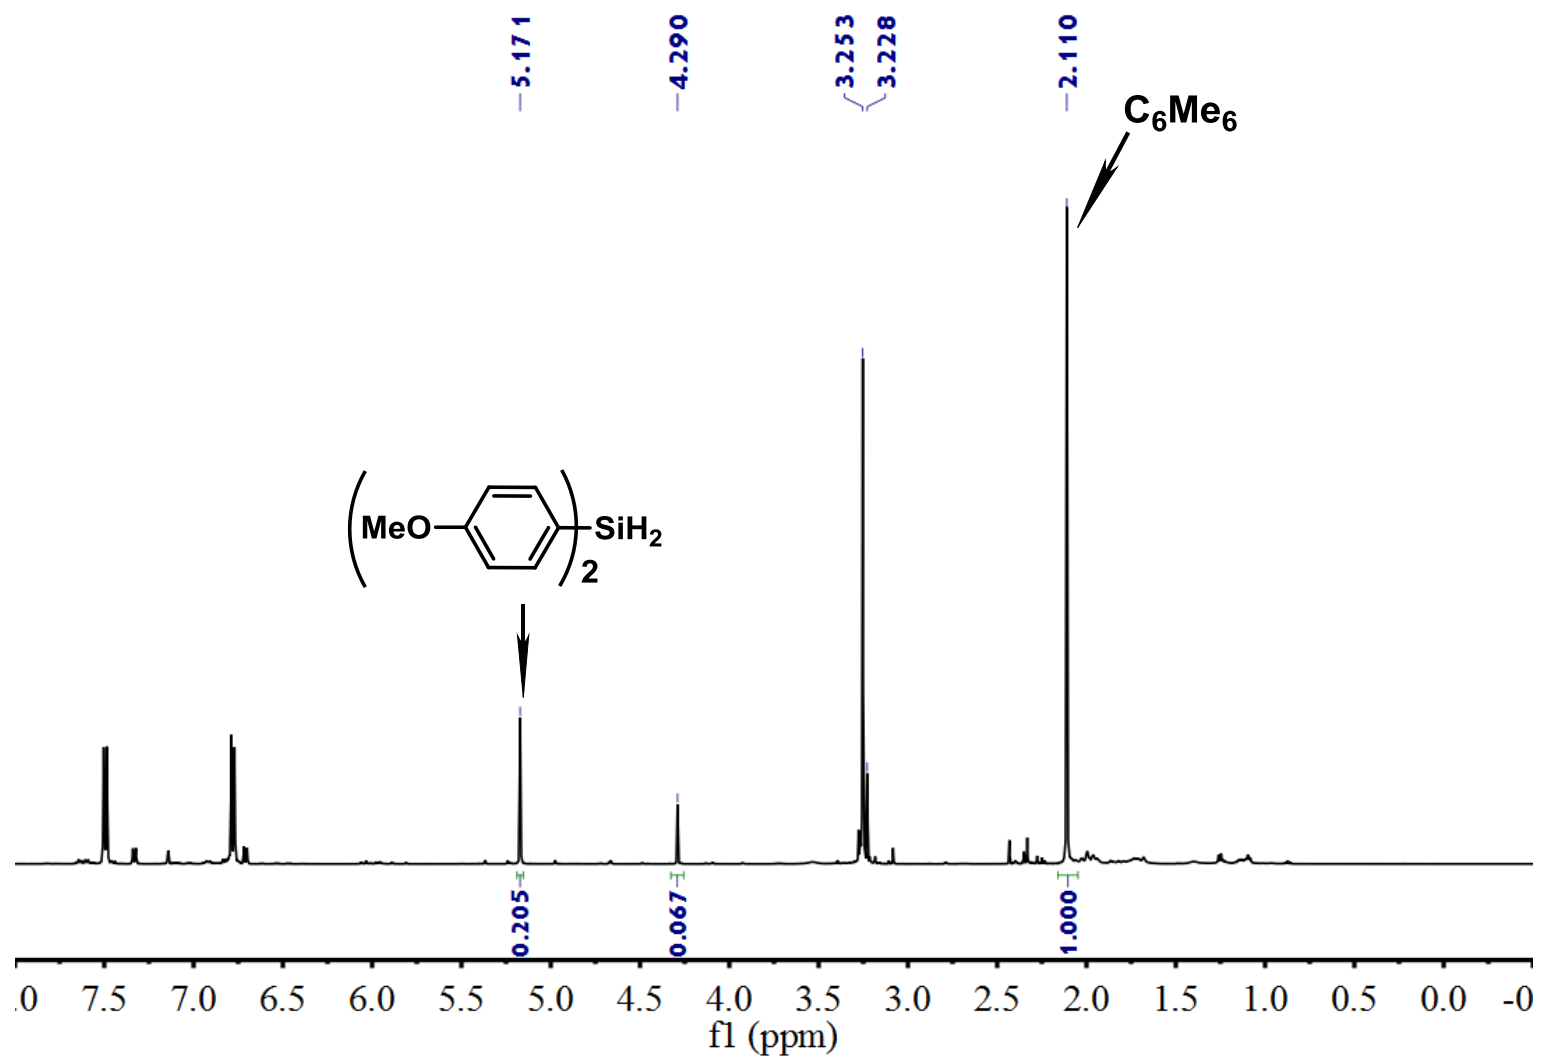

**Figure S16.** Quantitative <sup>1</sup>H NMR spectrum of the products of redistribution of 4-MeO-PhSiH<sub>3</sub> catalyzed by 5 mol% of **1** at r.t. in 10 min (Table 1, entry 9) (500 MHz, C<sub>6</sub>D<sub>6</sub>, 25 °C).

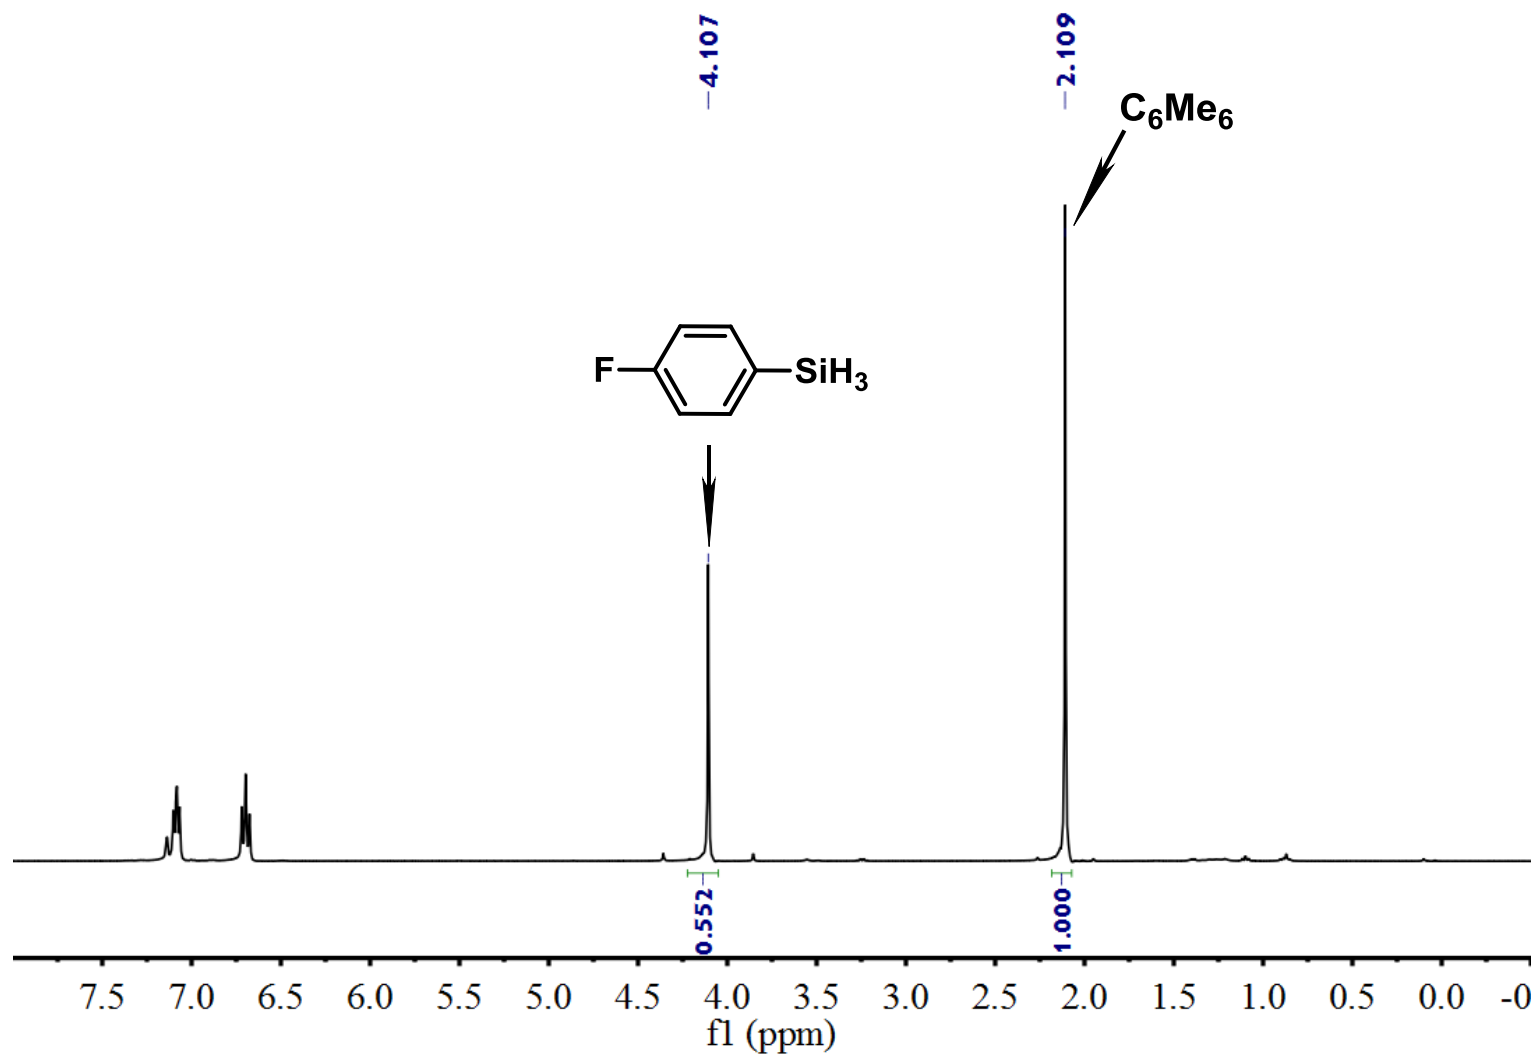

**Figure S17.** Quantitative <sup>1</sup>H NMR spectrum of the C<sub>6</sub>D<sub>6</sub> solution of 4-F-PhSiH<sub>3</sub> for the catalytic redistribution study with hexamethylbenzene as the internal standard (500 MHz, C<sub>6</sub>D<sub>6</sub>, 25 °C).

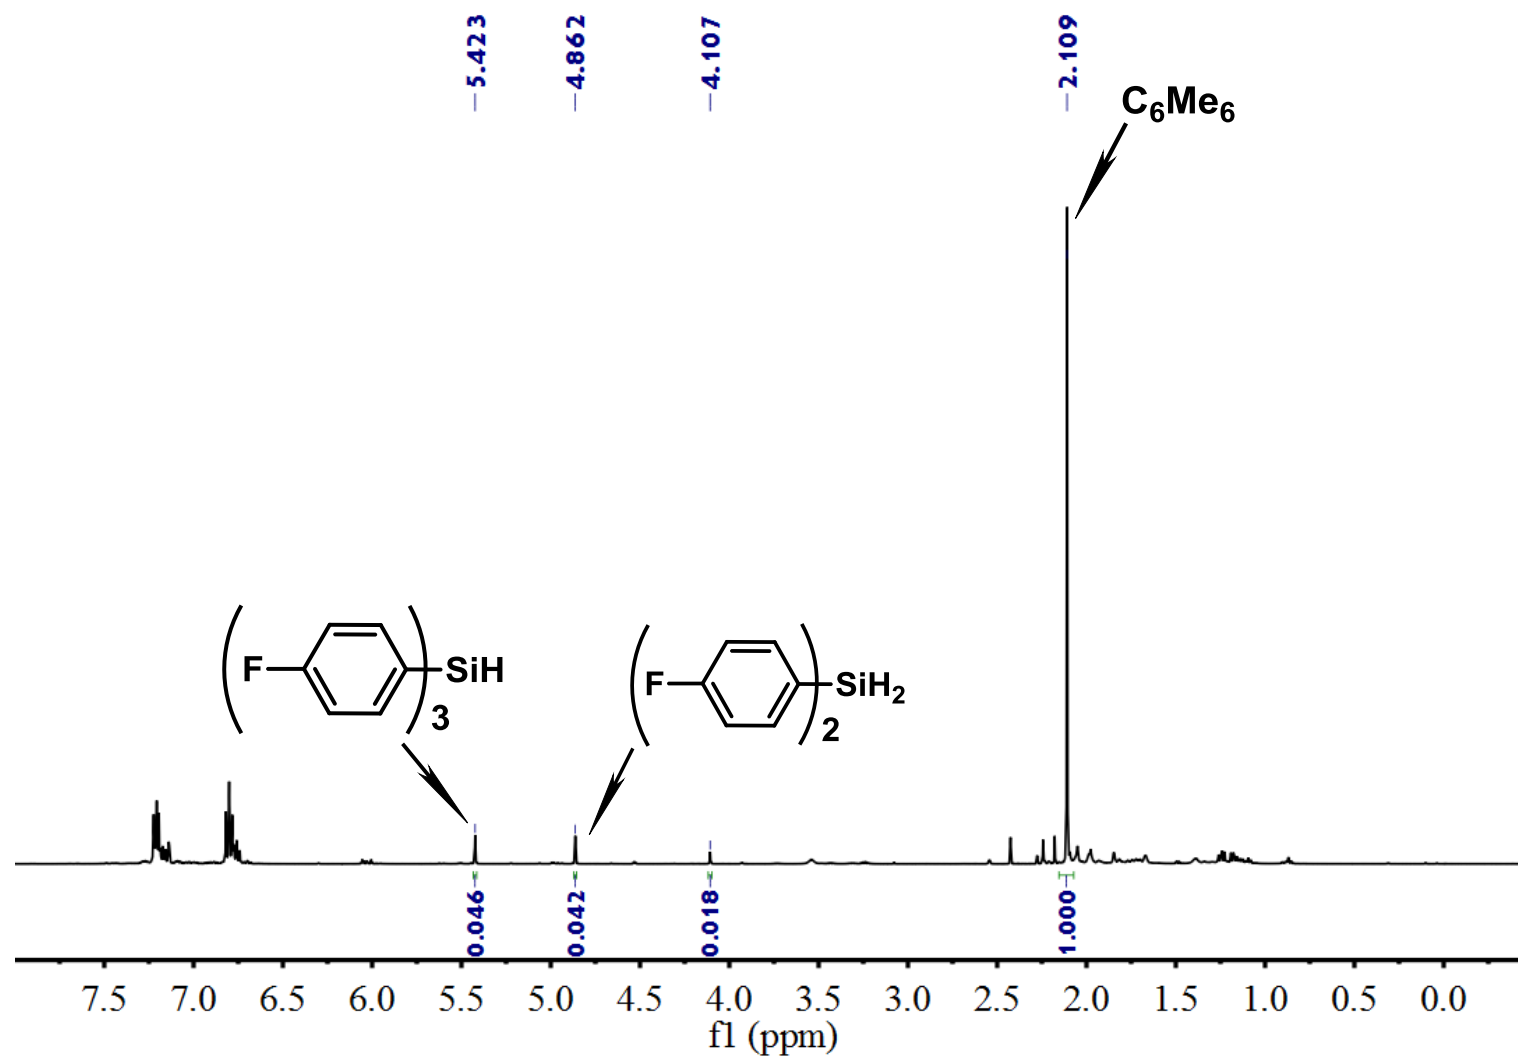

**Figure S18.** Quantitative  $^1\text{H}$  NMR spectrum of the products of redistribution of 4-F-PhSiH<sub>3</sub> catalyzed by 5 mol% of **1** at r.t. in 10 min (Table 1, entry 10) (500 MHz, C<sub>6</sub>D<sub>6</sub>, 25 °C).

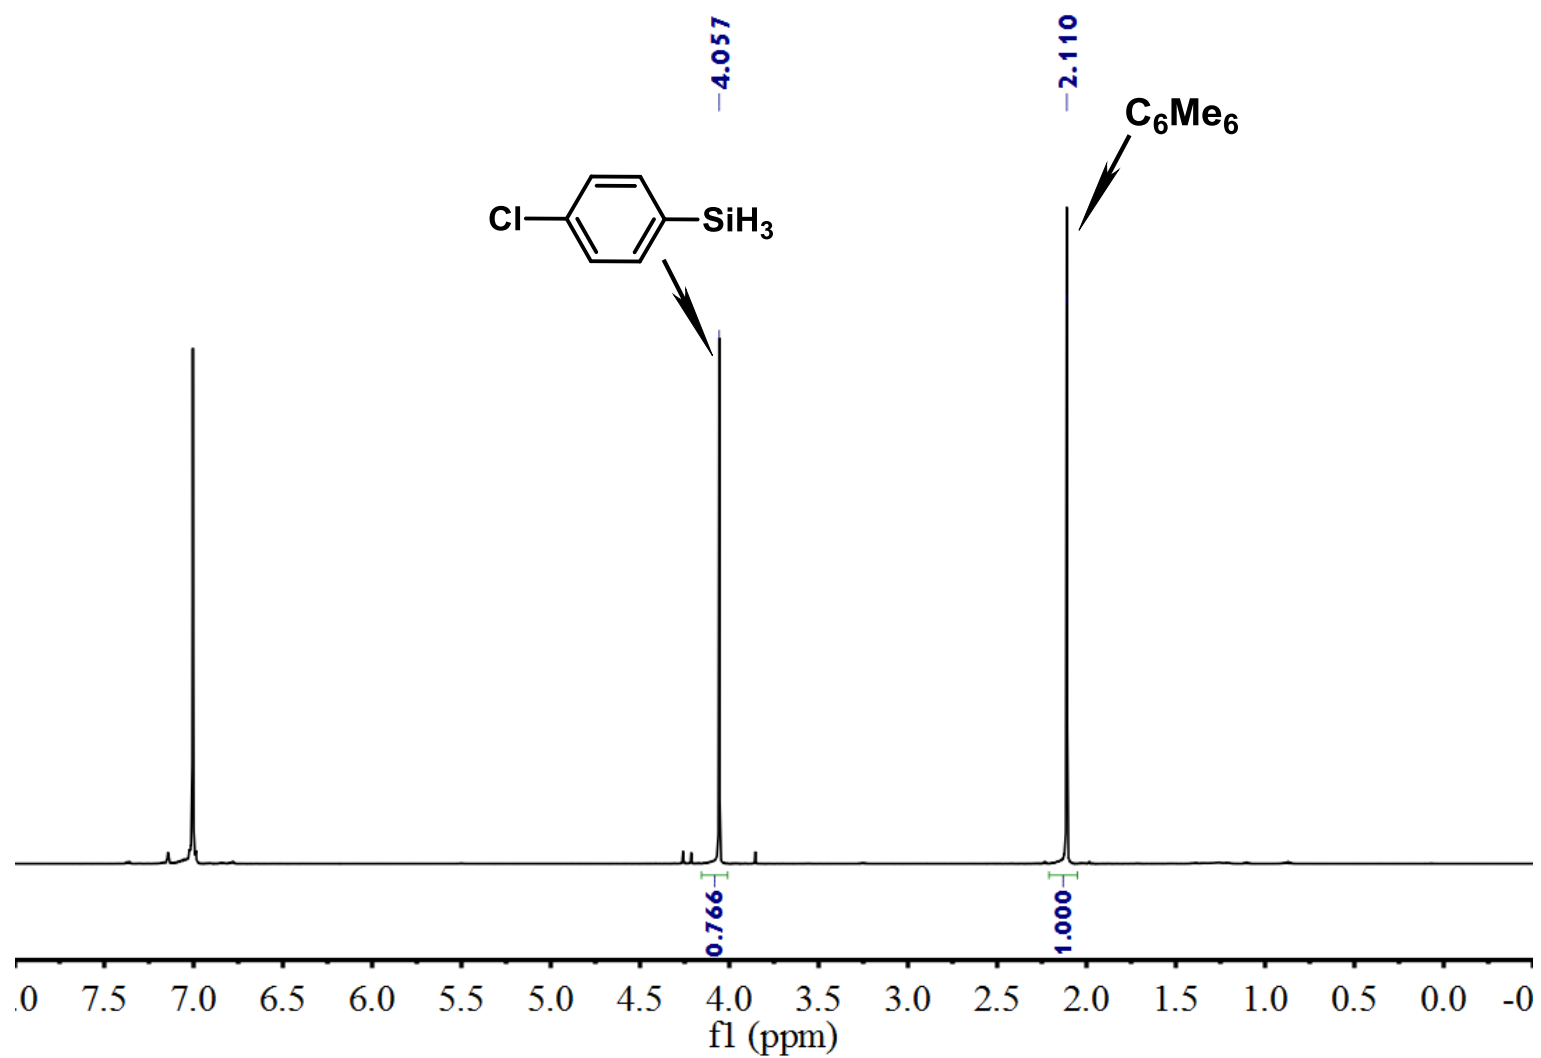

**Figure S19.** Quantitative <sup>1</sup>H NMR spectrum of the C<sub>6</sub>D<sub>6</sub> solution of 4-Cl-PhSiH<sub>3</sub> for the catalytic redistribution study with hexamethylbenzene as the internal standard (500 MHz, C<sub>6</sub>D<sub>6</sub>, 25 °C).

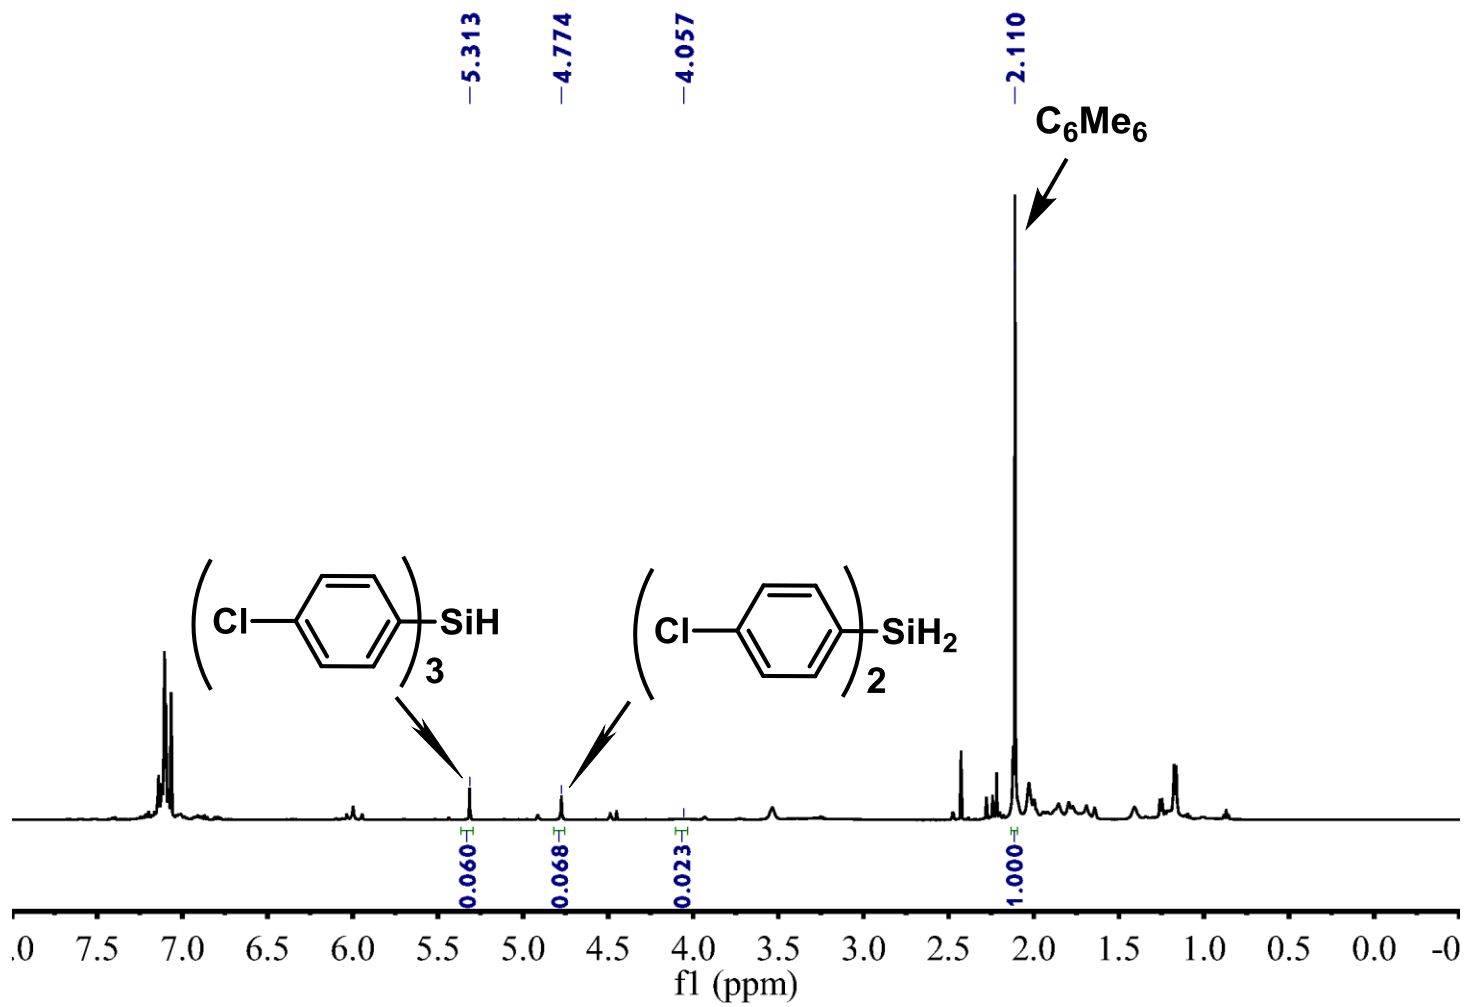

**Figure S20.** Quantitative  $^1\text{H}$  NMR spectrum of the products of redistribution of 4-Cl-PhSiH<sub>3</sub> catalyzed by 5 mol% of **1** at r.t. in 10 min (Table 1, entry 11) (500 MHz, C<sub>6</sub>D<sub>6</sub>, 25 °C).

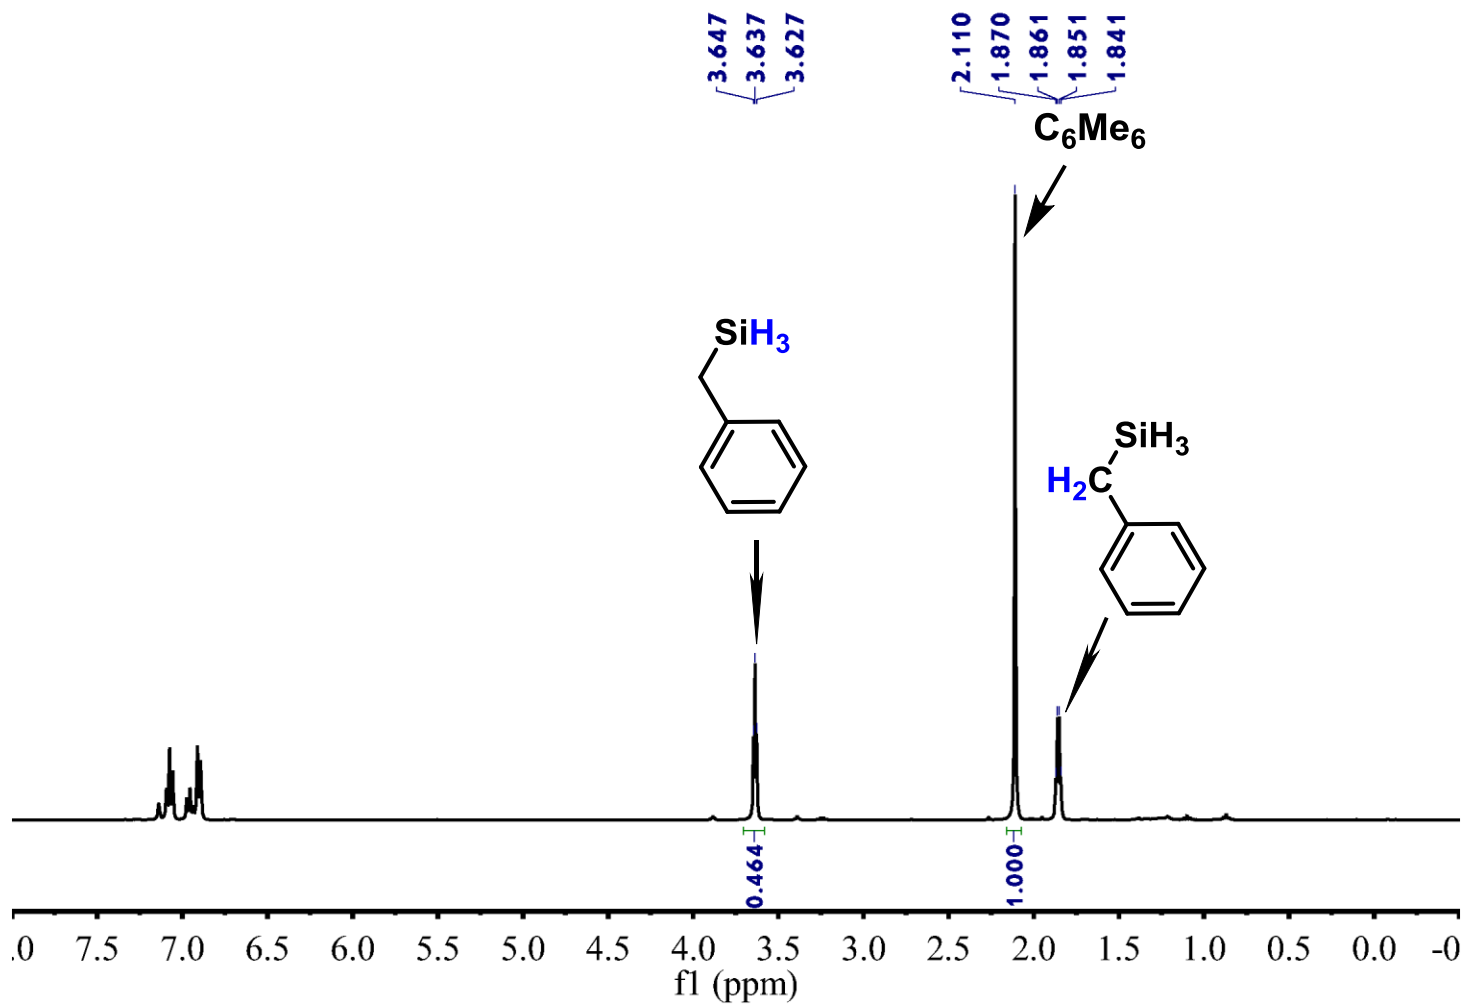

**Figure S21.** Quantitative  $^1\text{H}$  NMR spectrum of the  $\text{C}_6\text{D}_6$  solution of benzylsilane for the catalytic redistribution study with hexamethylbenzene as the internal standard (500 MHz,  $\text{C}_6\text{D}_6$ , 25  $^\circ\text{C}$ ).

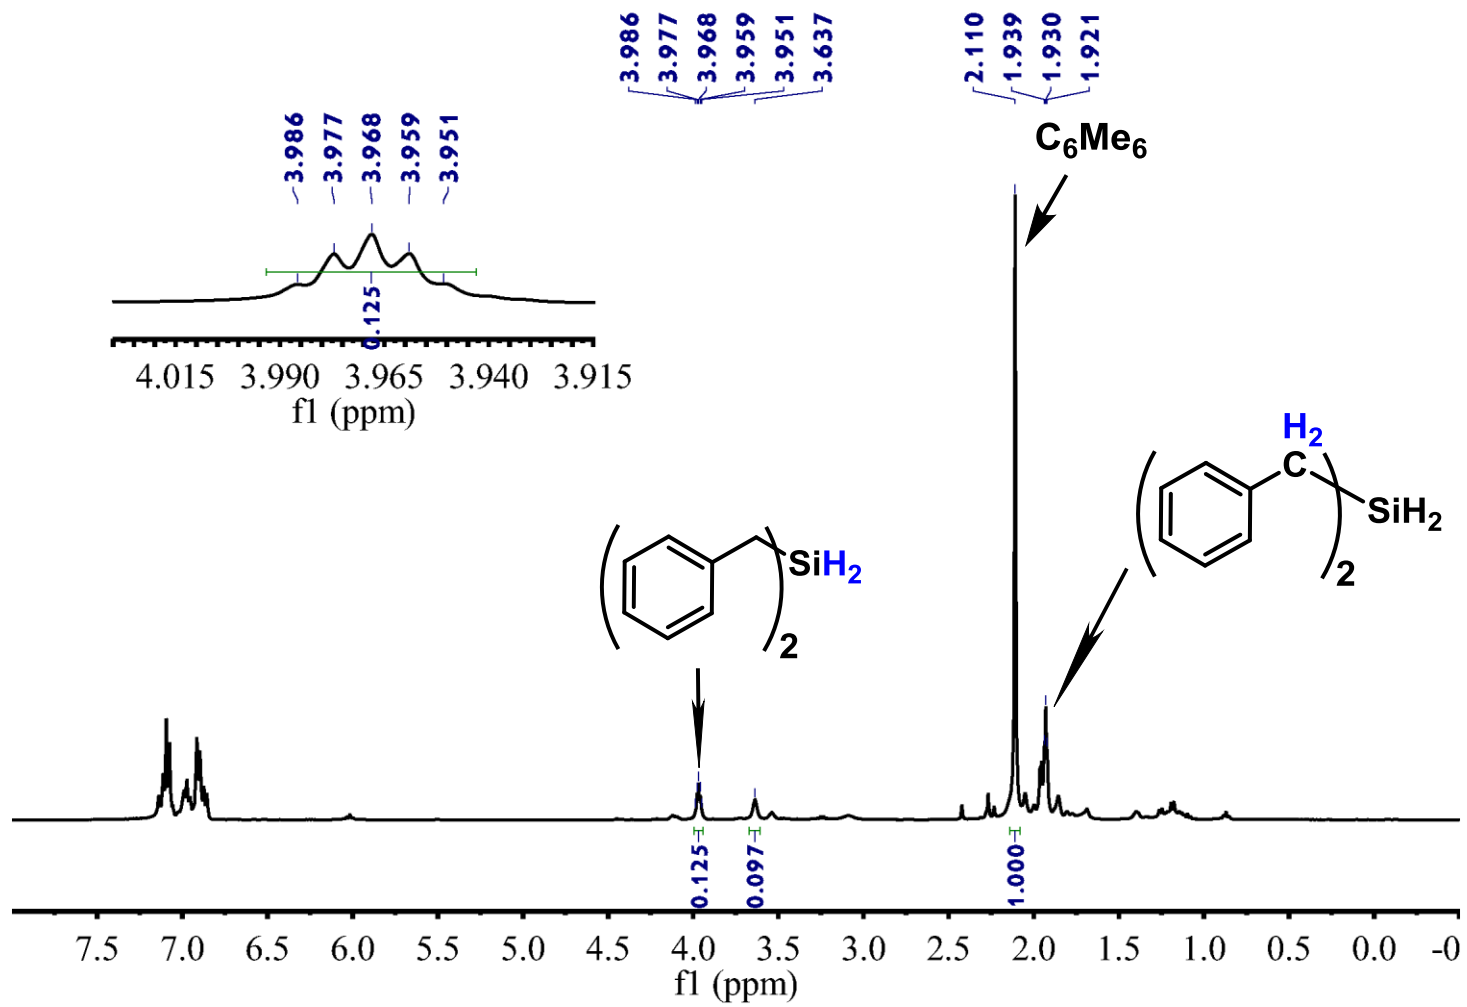

**Figure S22.** Quantitative <sup>1</sup>H NMR spectrum of the products of redistribution of benzylsilane catalyzed by 5 mol% of **1** at r.t. in 10 min (Table 1, entry 13) (500 MHz, C<sub>6</sub>D<sub>6</sub>, 25 °C).



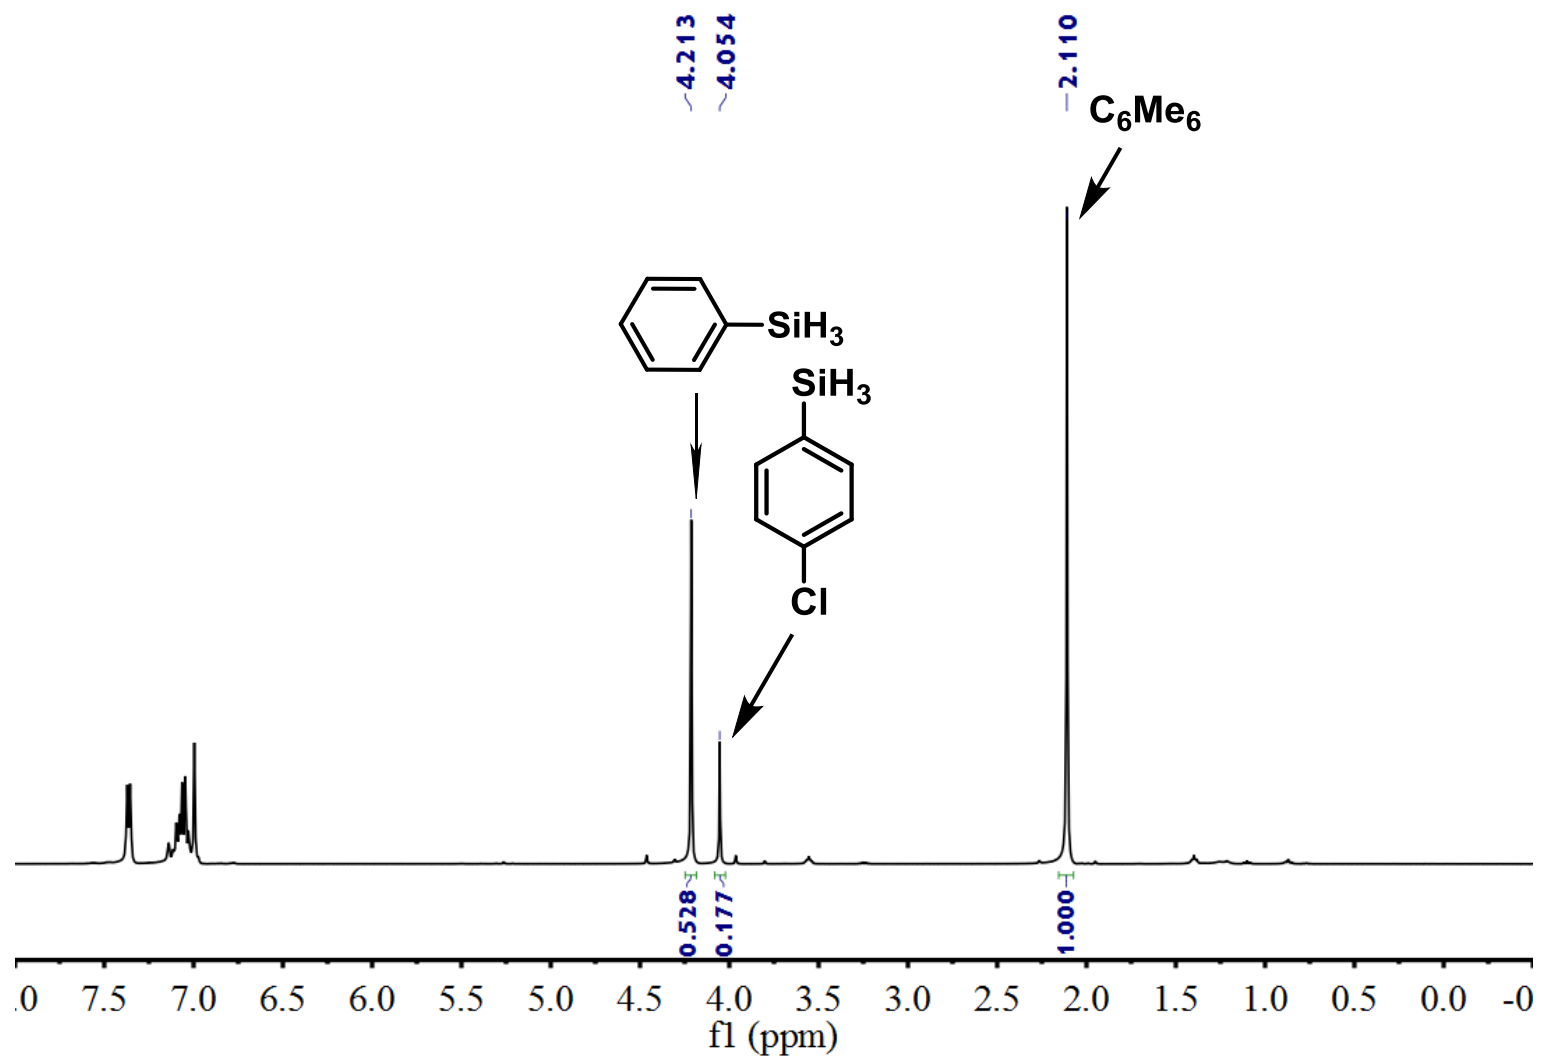

**Figure S23** Quantitative  $^1\text{H}$  NMR spectrum of the  $\text{C}_6\text{D}_6$  solution of 4-Cl-PhSiH<sub>3</sub> and PhSiH<sub>3</sub> (~3 equiv.) for the cross-desilacoupling catalyzed by **1** with hexamethylbenzene as the internal standard (500 MHz,  $\text{C}_6\text{D}_6$ , 25 °C).

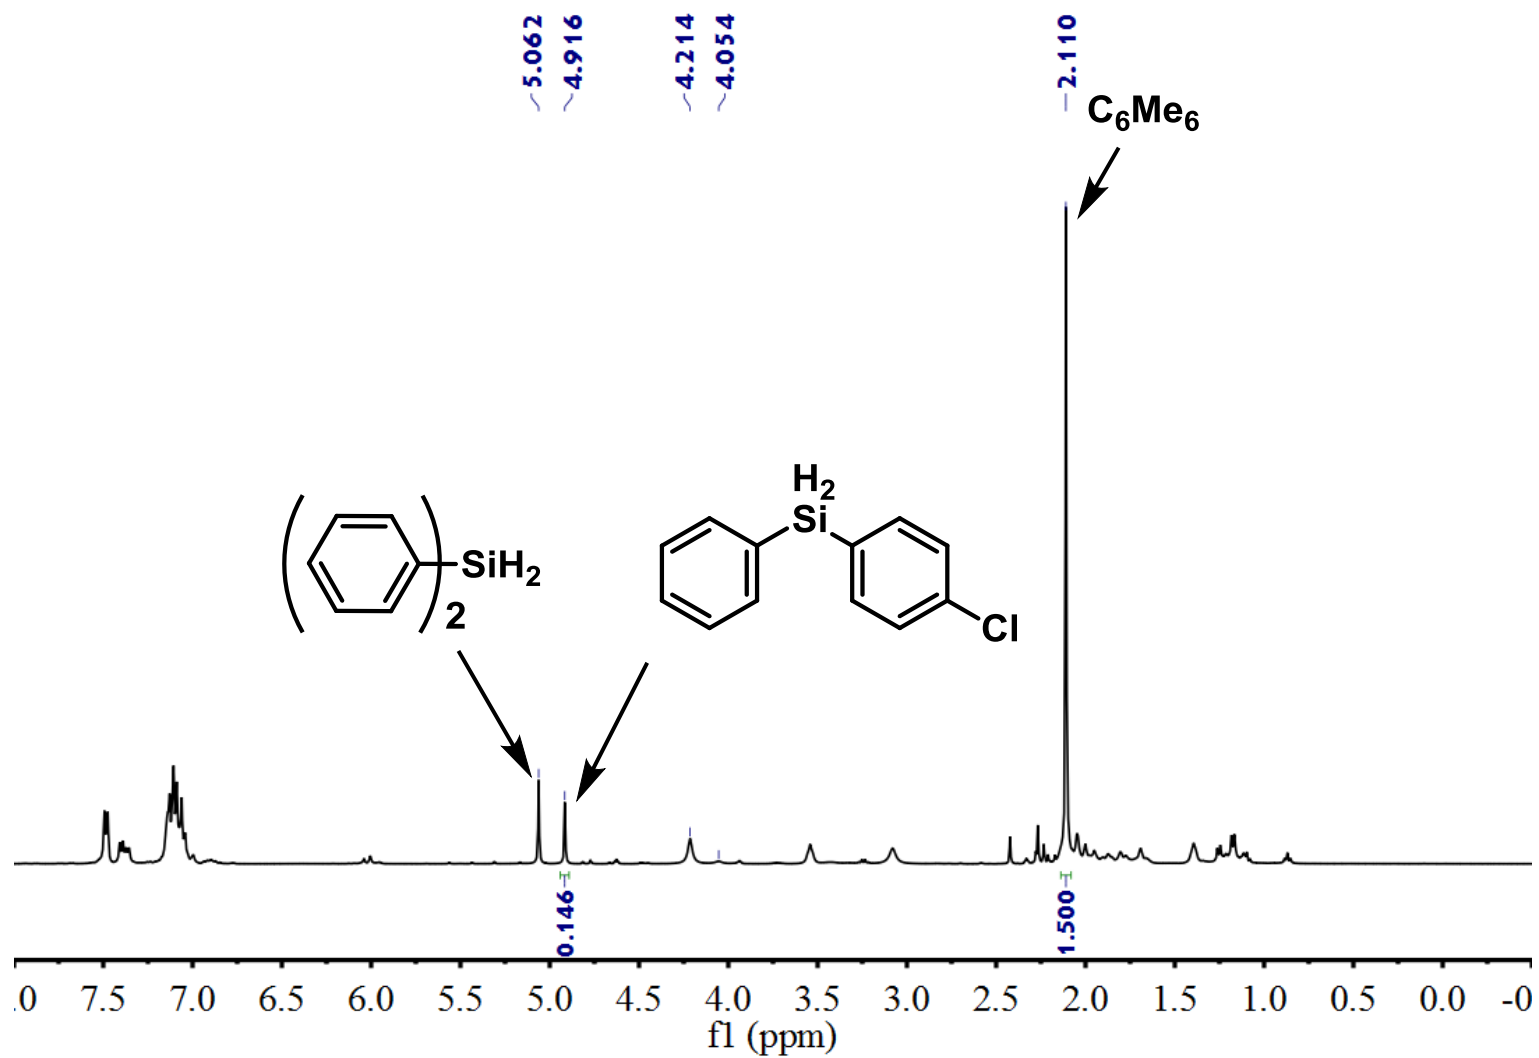

**Figure S24.** Quantitative  $^1\text{H}$  NMR spectrum of the products of the cross-desilacoupling of 4-Cl-PhSiH<sub>3</sub> and PhSiH<sub>3</sub> (~3 equiv.) catalyzed by **1** at r.t. in 5 min (Table 2) (500 MHz, C<sub>6</sub>D<sub>6</sub>, 25 °C).

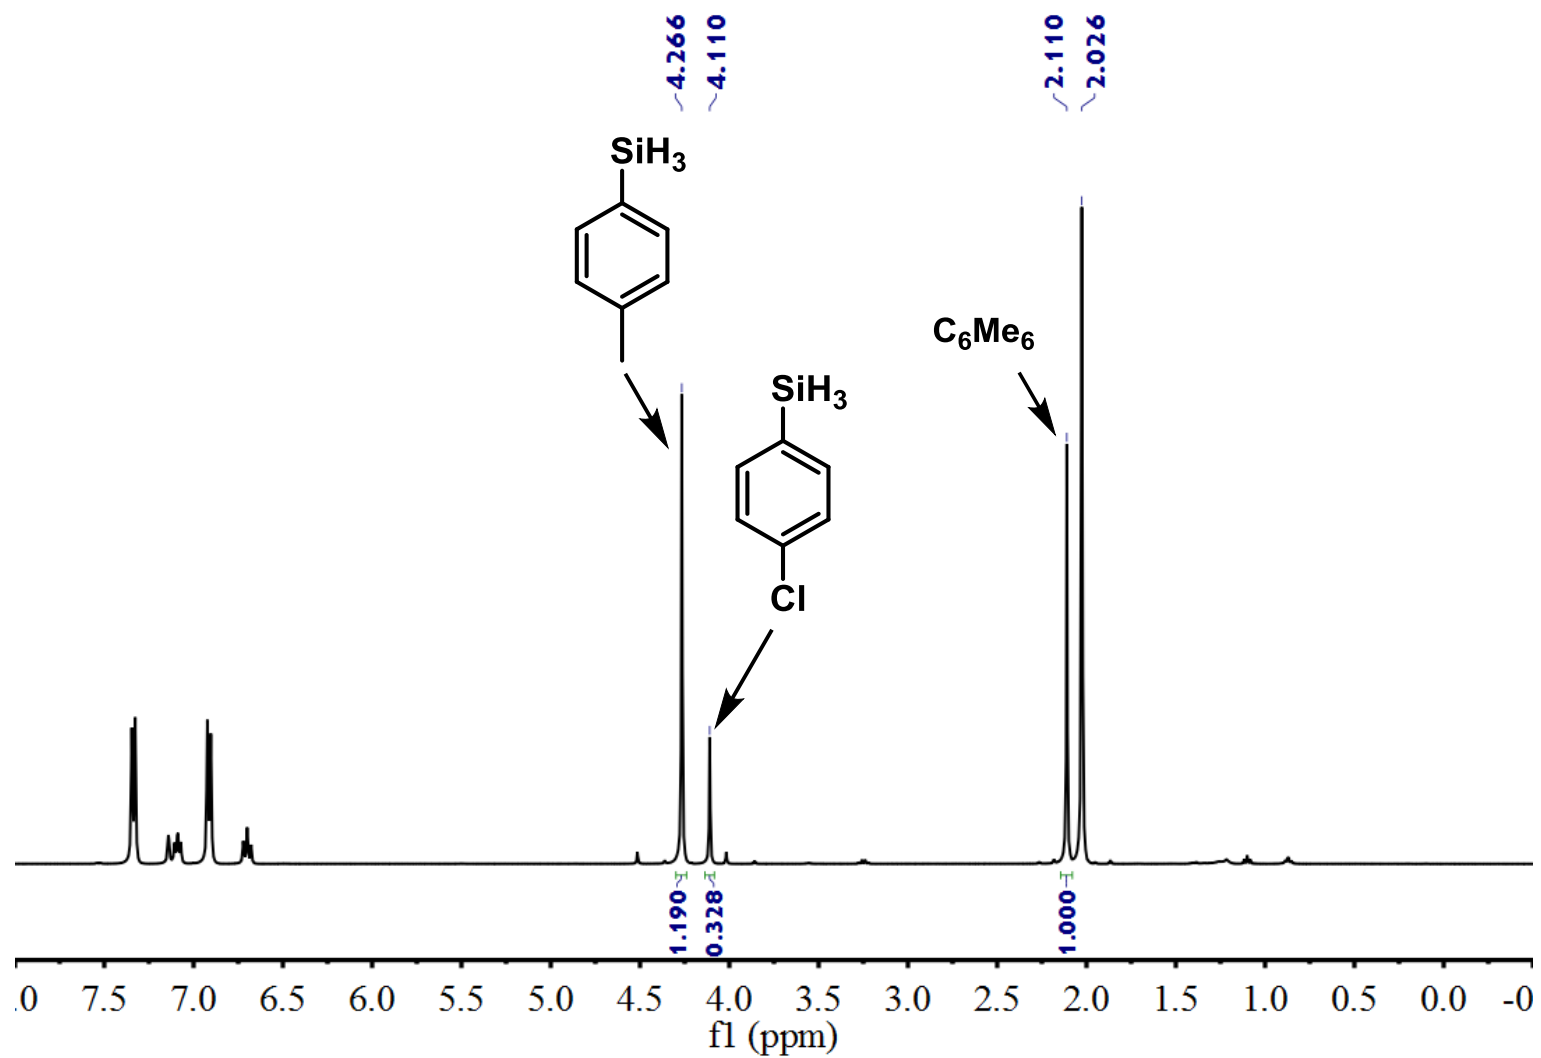

**Figure S25.** Quantitative  $^1\text{H}$  NMR spectrum of the  $\text{C}_6\text{D}_6$  solution of 4-Cl-PhSiH<sub>3</sub> and 4-Me-PhSiH<sub>3</sub> (~3 equiv.) for the cross-desilacoupling catalyzed by **1** with hexamethylbenzene as the internal standard (500 MHz,  $\text{C}_6\text{D}_6$ , 25 °C).

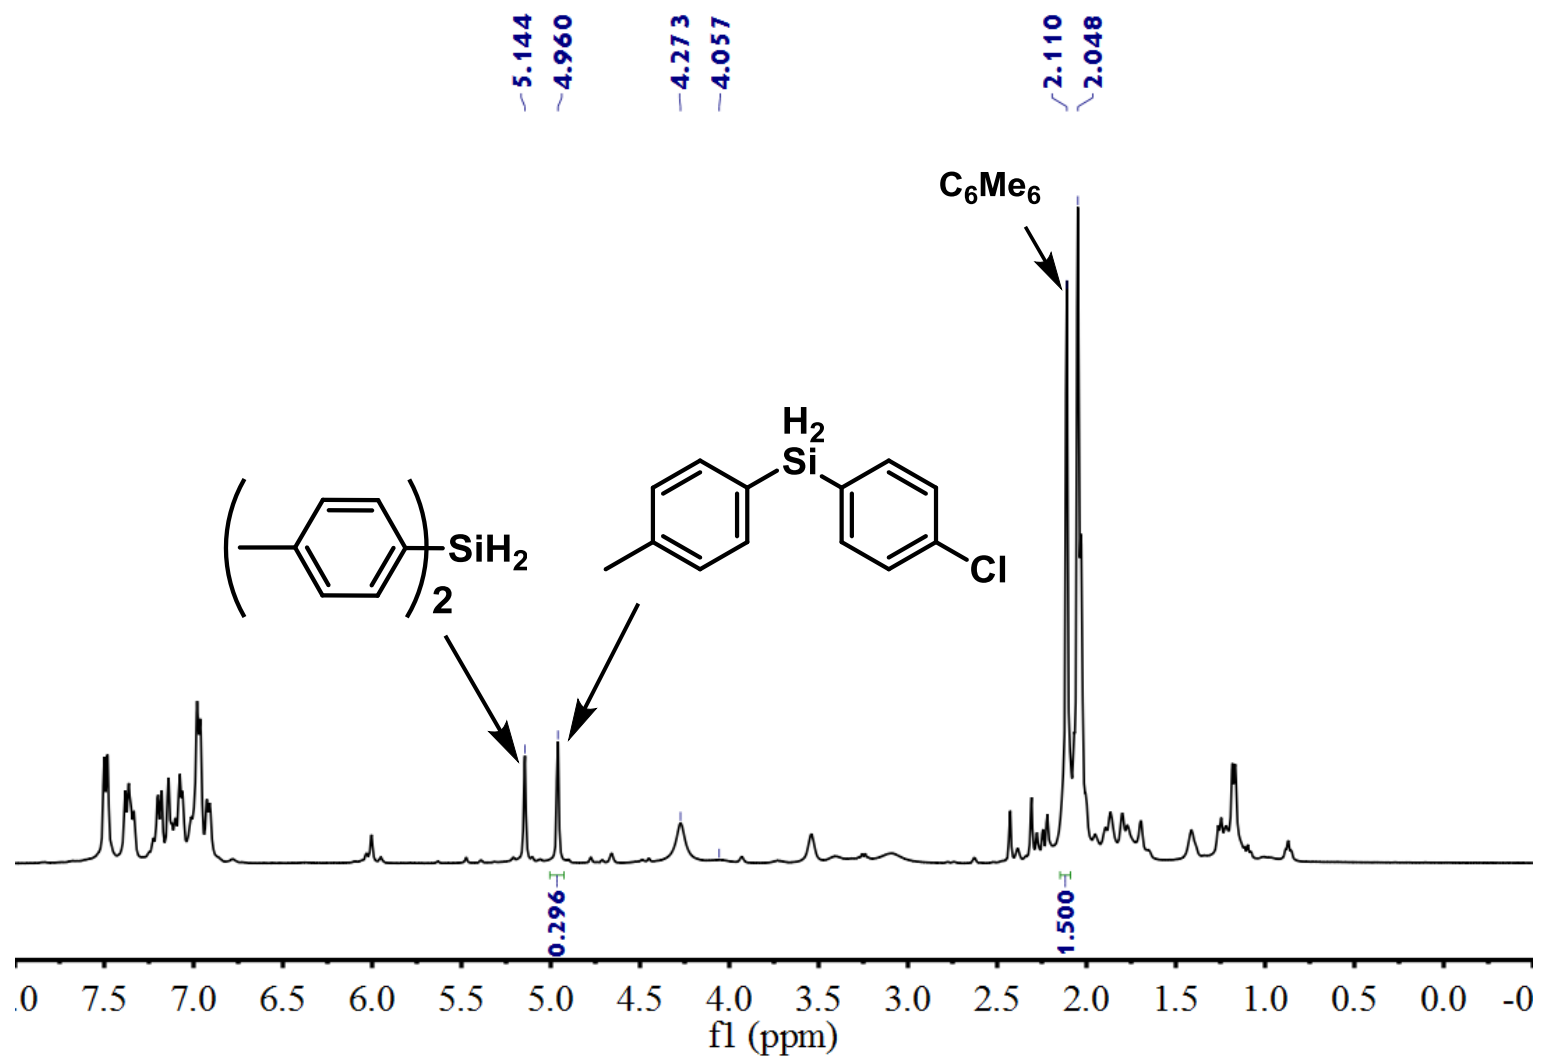

**Figure S26.** Quantitative  $^1\text{H}$  NMR spectrum of the products of the cross-desilacoupling of 4-Cl-PhSiH<sub>3</sub> and 4-Me-PHSiH<sub>3</sub> (~3 equiv.) catalyzed by **1** at r.t. in 5 min (Table 2) (500 MHz, C<sub>6</sub>D<sub>6</sub>, 25 °C).

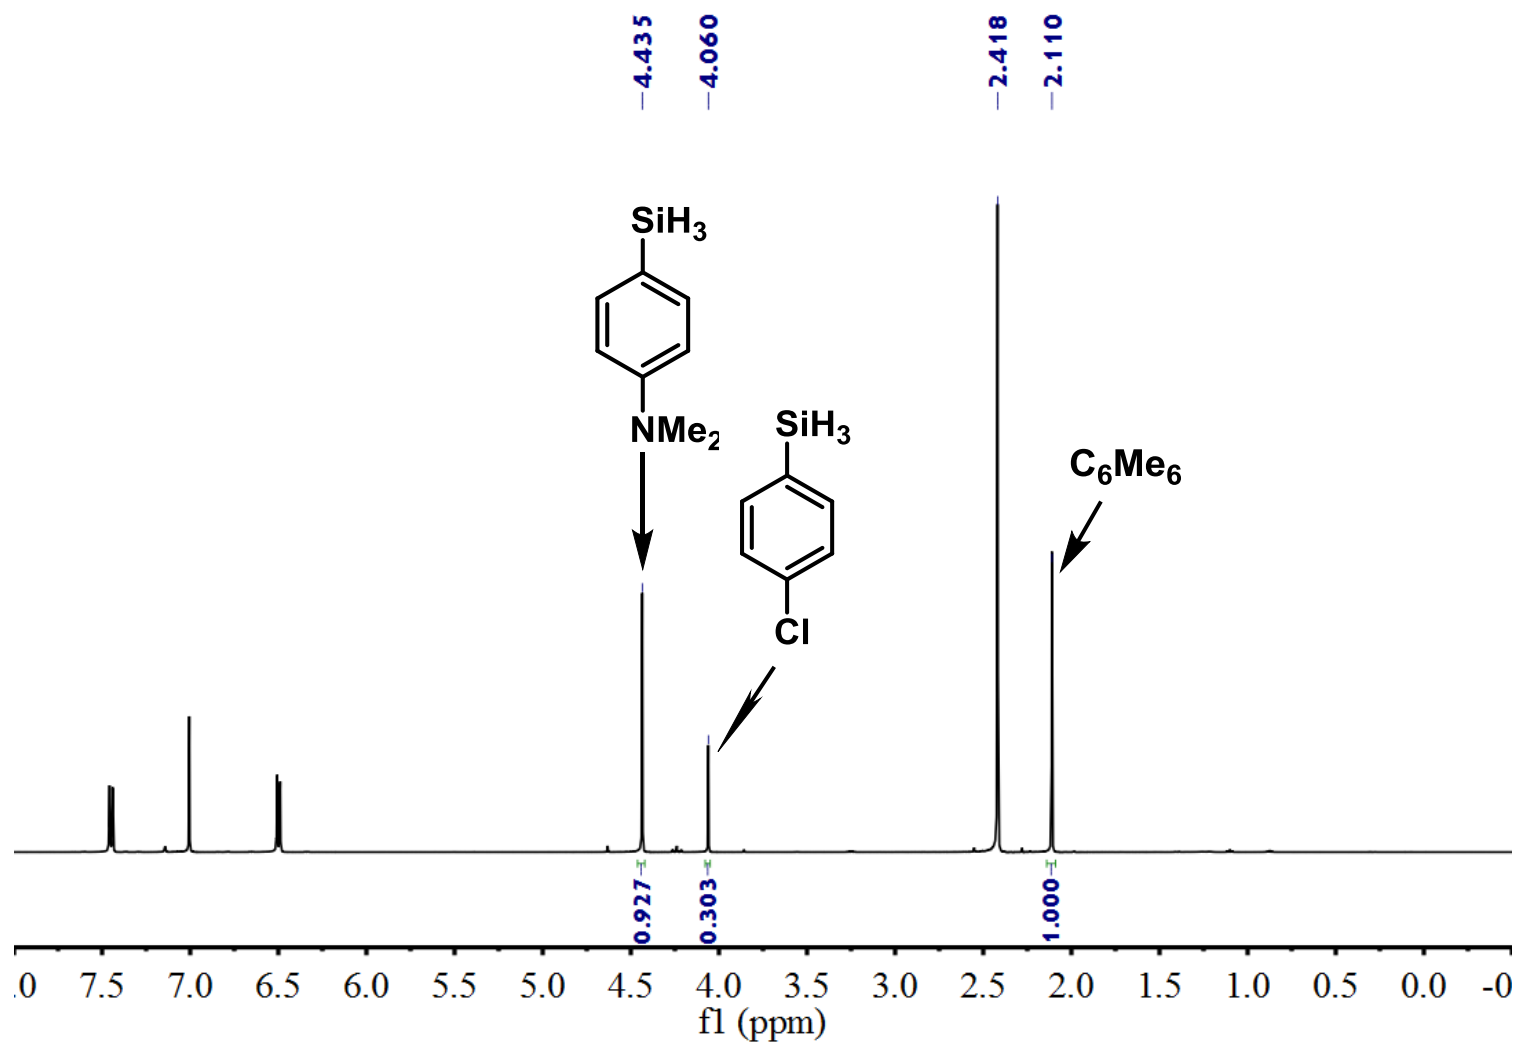

**Figure S27.** Quantitative  $^1\text{H}$  NMR spectrum of the  $\text{C}_6\text{D}_6$  solution of 4-Cl-PhSiH<sub>3</sub> and 4-NMe<sub>2</sub>-PhSiH<sub>3</sub> (~3 equiv.) for the cross-desilacoupling catalyzed by **1** with hexamethylbenzene as the internal standard (500 MHz,  $\text{C}_6\text{D}_6$ , 25 °C).

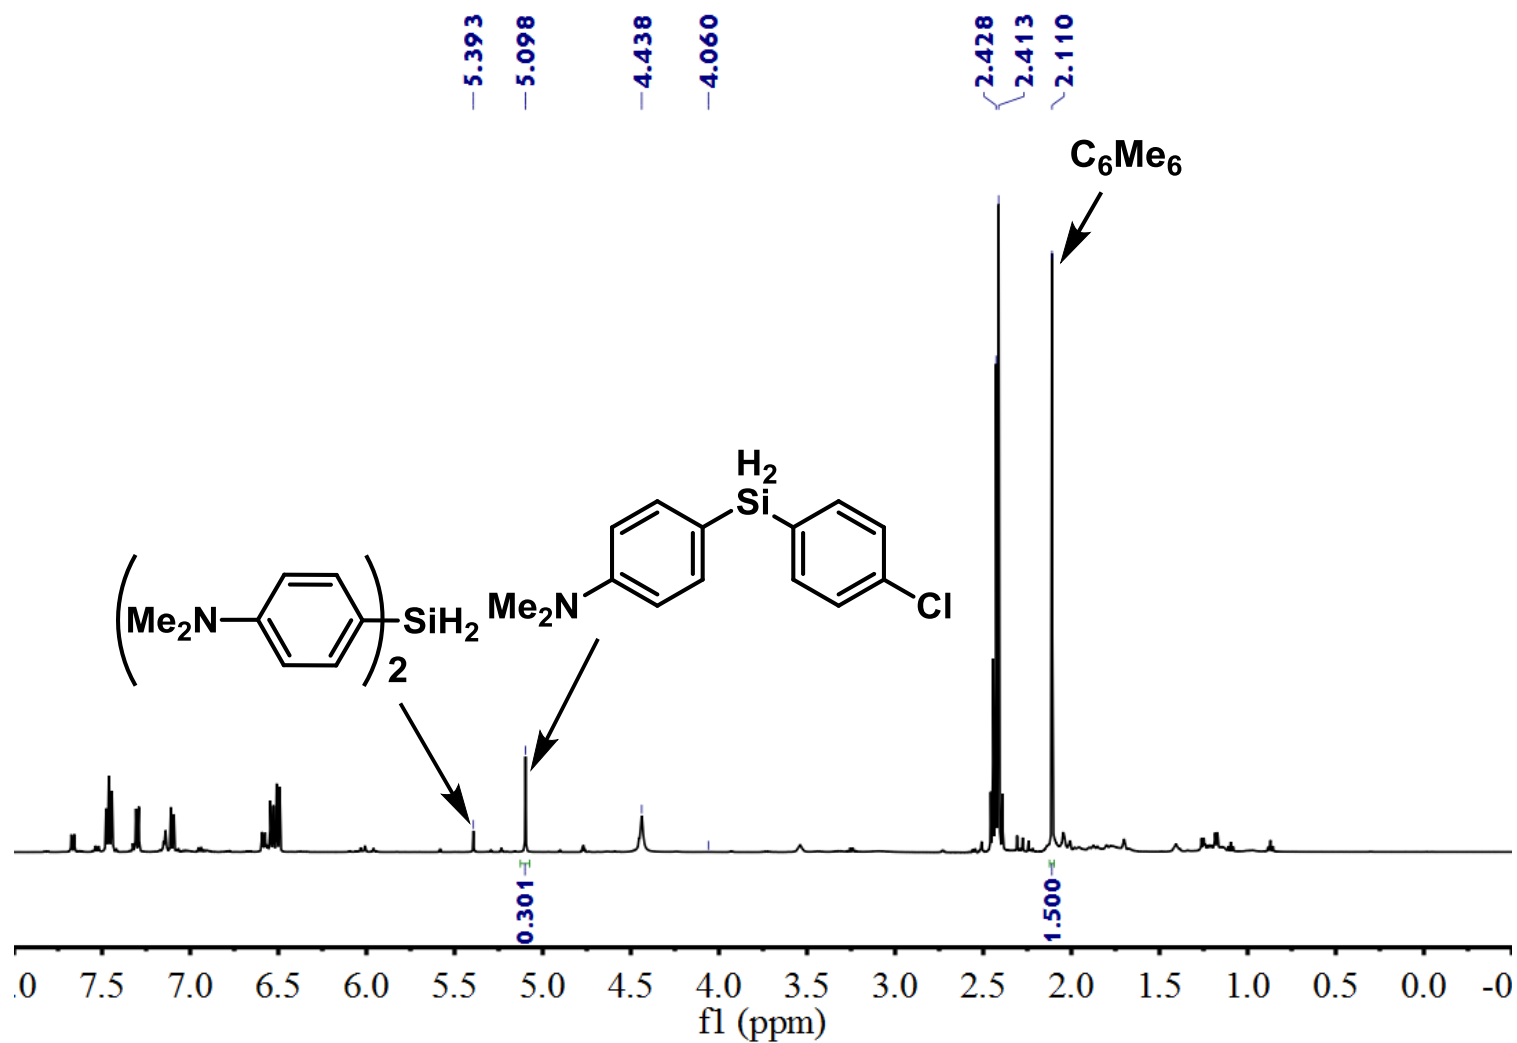

**Figure S28.** Quantitative  $^1\text{H}$  NMR spectrum of the products of the cross-desilacoupling of 4-Cl-PhSiH<sub>3</sub> and 4-NMe<sub>2</sub>-PhSiH<sub>3</sub> (~3 equiv.) catalyzed by **1** at r.t. in 5 min (Table 2) (500 MHz, C<sub>6</sub>D<sub>6</sub>, 25 °C).

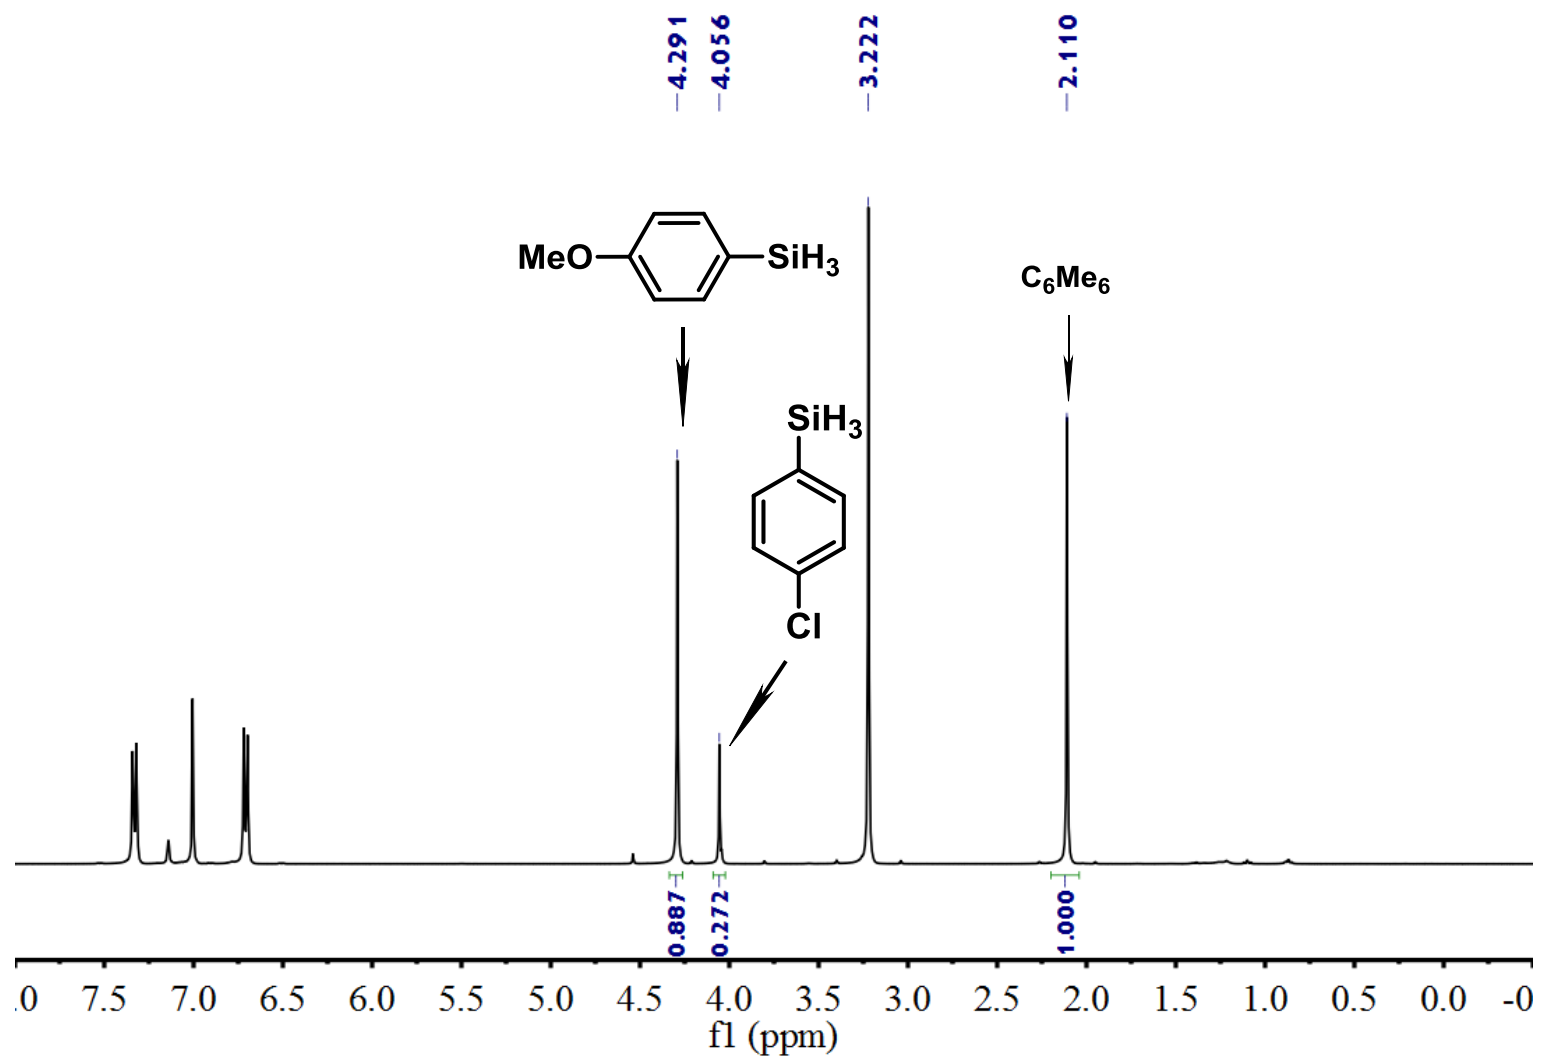

**Figure S29.** Quantitative  $^1\text{H}$  NMR spectrum of the  $\text{C}_6\text{D}_6$  solution of 4-Cl-PhSiH<sub>3</sub> and 4-MeO-PhSiH<sub>3</sub> (~3 equiv.) for the cross-desilacoupling catalyzed by **1** with hexamethylbenzene as the internal standard (500 MHz,  $\text{C}_6\text{D}_6$ , 25 °C).

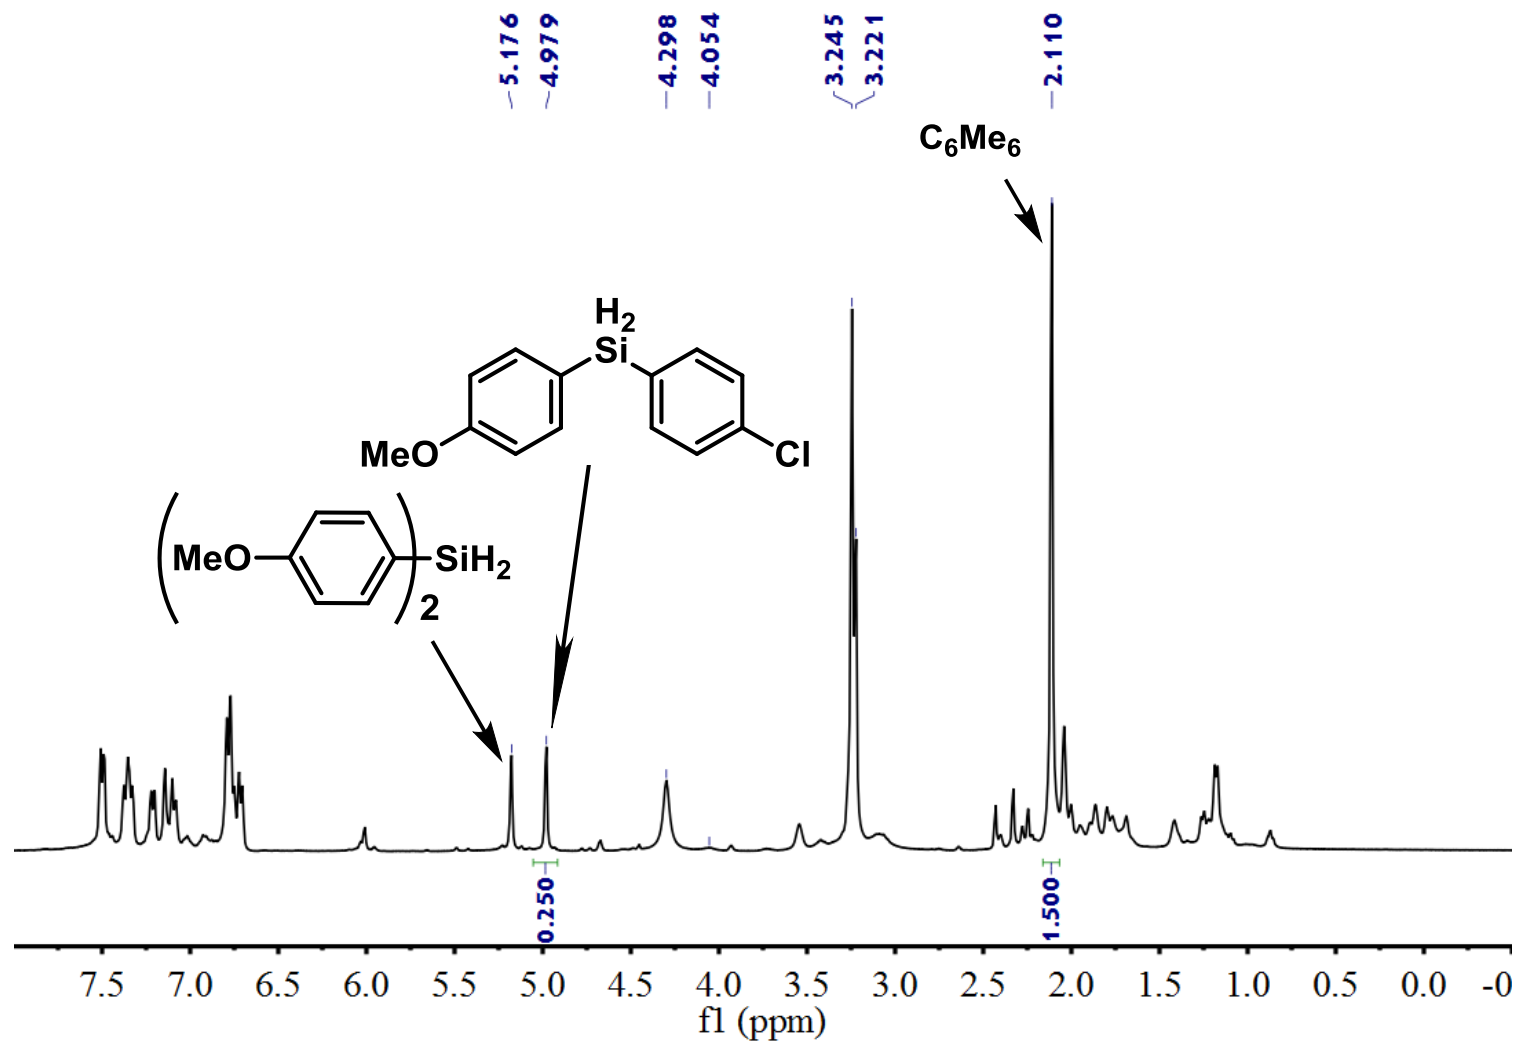

**Figure S30.** Quantitative <sup>1</sup>H NMR spectrum of the products of the cross-desilacoupling of 4-Cl-PhSiH<sub>3</sub> and 4-MeO-PhSiH<sub>3</sub> (~3 equiv.) catalyzed by **1** at r.t. in 5 min (Table 2) (500 MHz, C<sub>6</sub>D<sub>6</sub>, 25 °C).



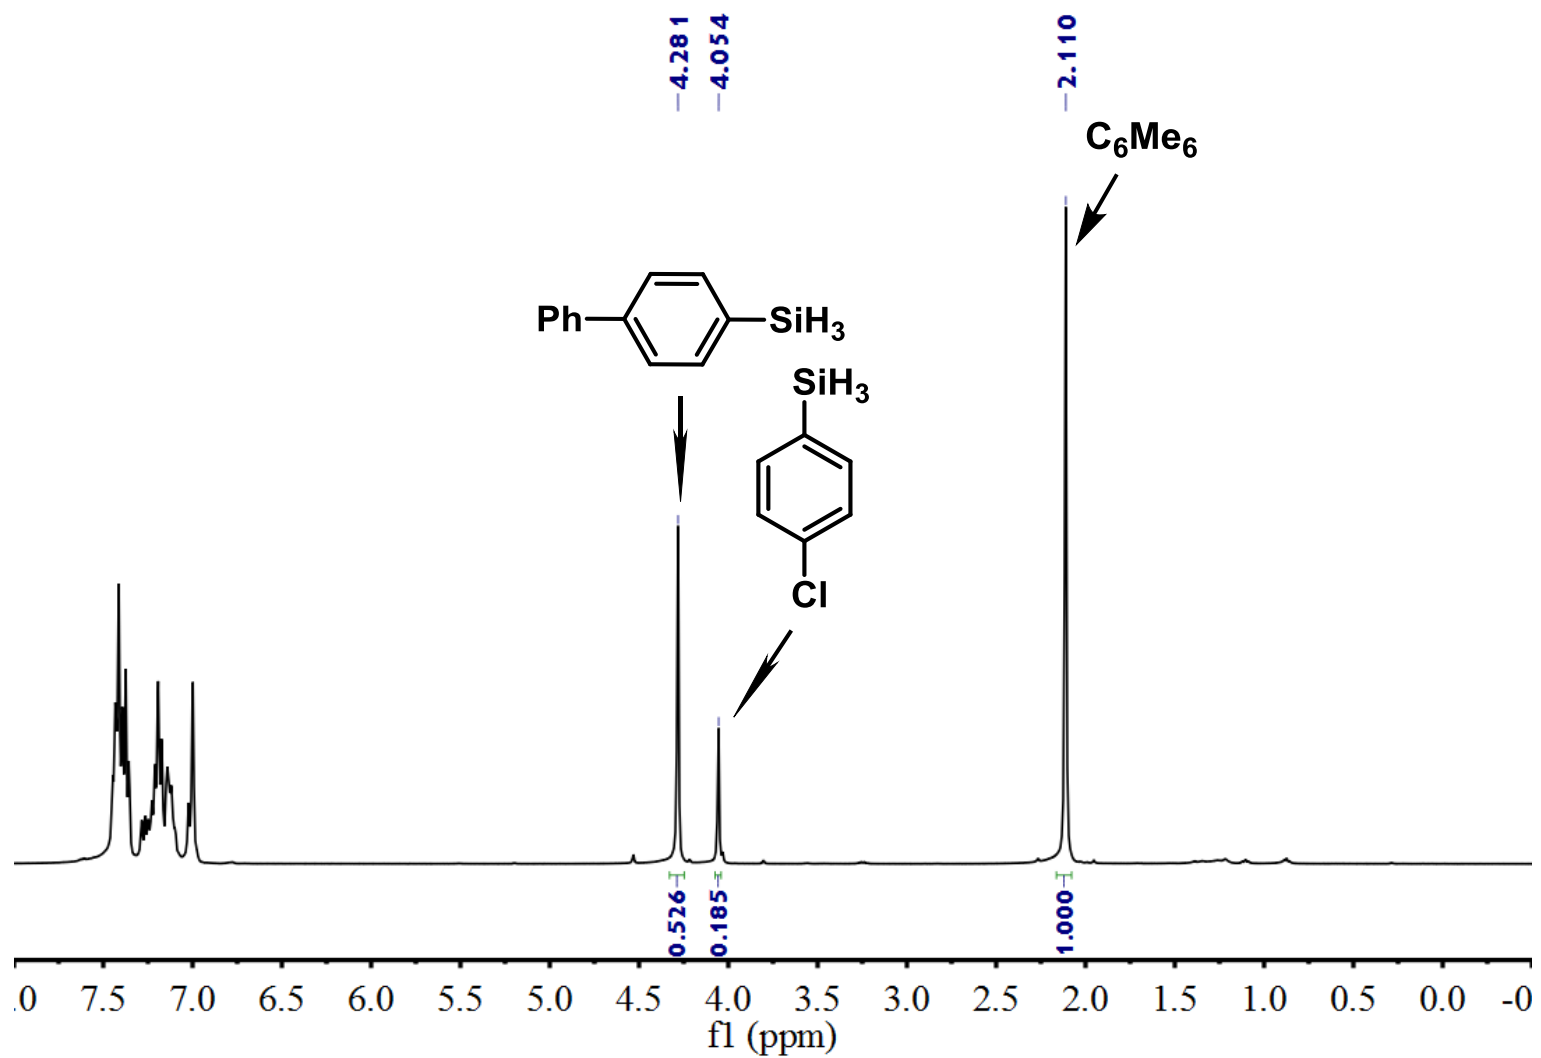

**Figure S31.** Quantitative  $^1\text{H}$  NMR spectrum of the  $\text{C}_6\text{D}_6$  solution of 4-Cl-PhSiH<sub>3</sub> and 4-Ph-PhSiH<sub>3</sub> (~3 equiv.) for the cross-desilacoupling catalyzed by **1** with hexamethylbenzene as the internal standard (500 MHz,  $\text{C}_6\text{D}_6$ , 25 °C).

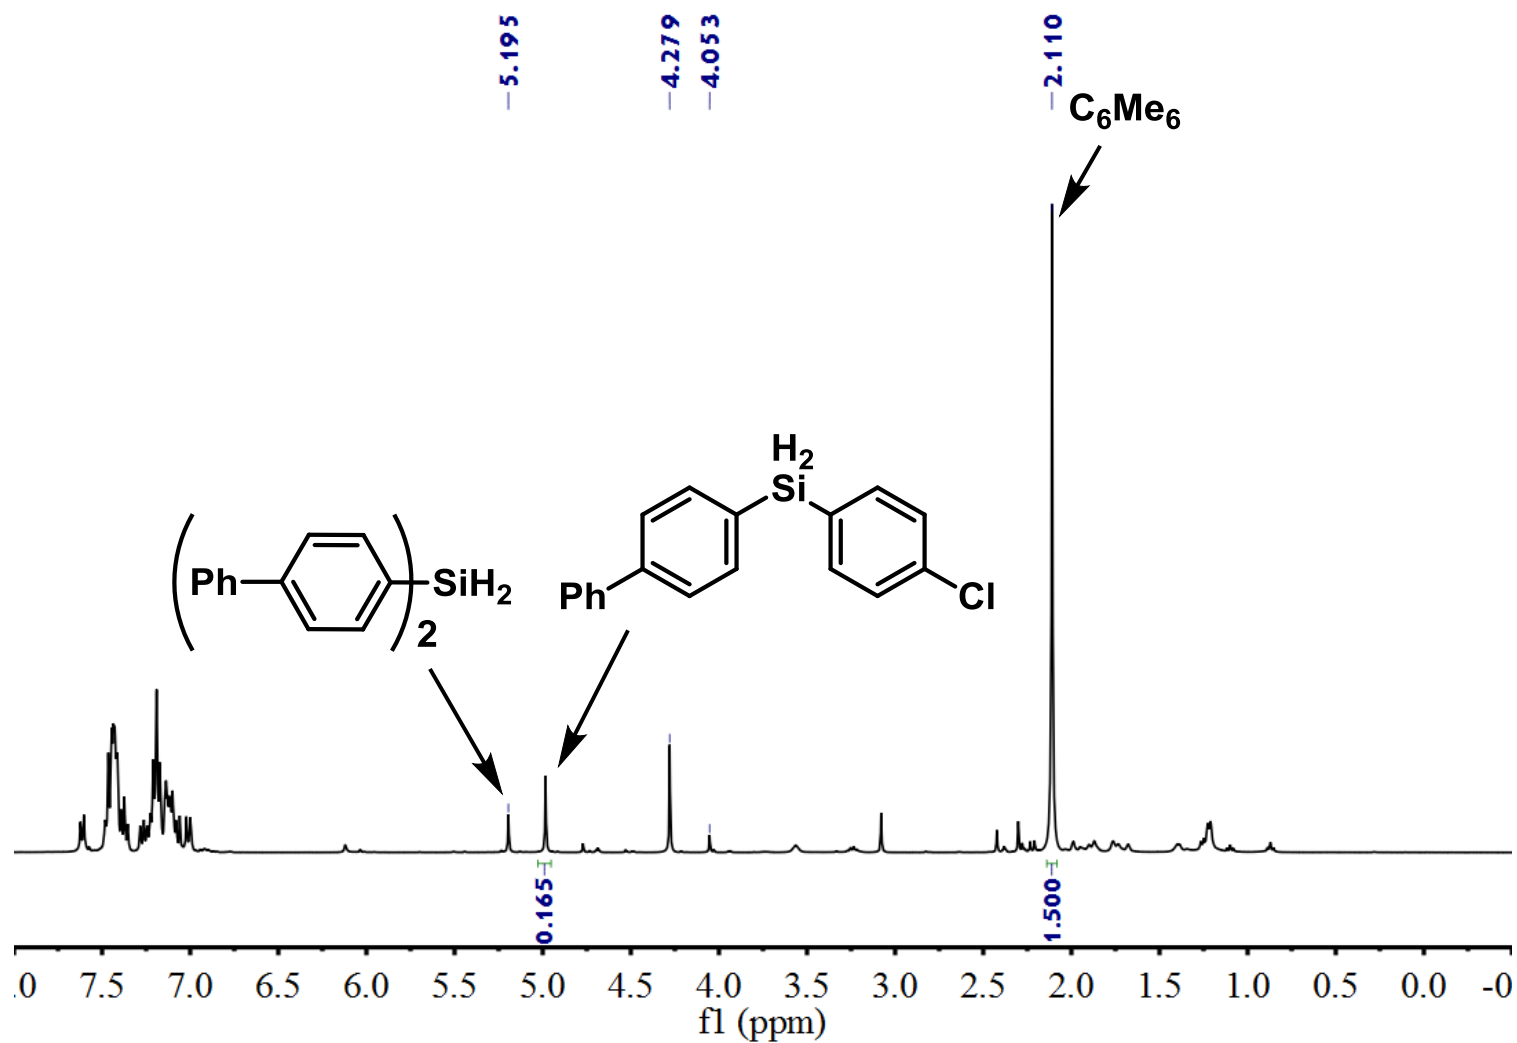

**Figure S32.** Quantitative  $^1\text{H}$  NMR spectrum of the products of the cross-desilacoupling of 4-Cl-PhSiH<sub>3</sub> and 4-Ph-PhSiH<sub>3</sub> (~3 equiv.) catalyzed by **1** at r.t. in 5 min (Table 2) (500 MHz, C<sub>6</sub>D<sub>6</sub>, 25 °C).

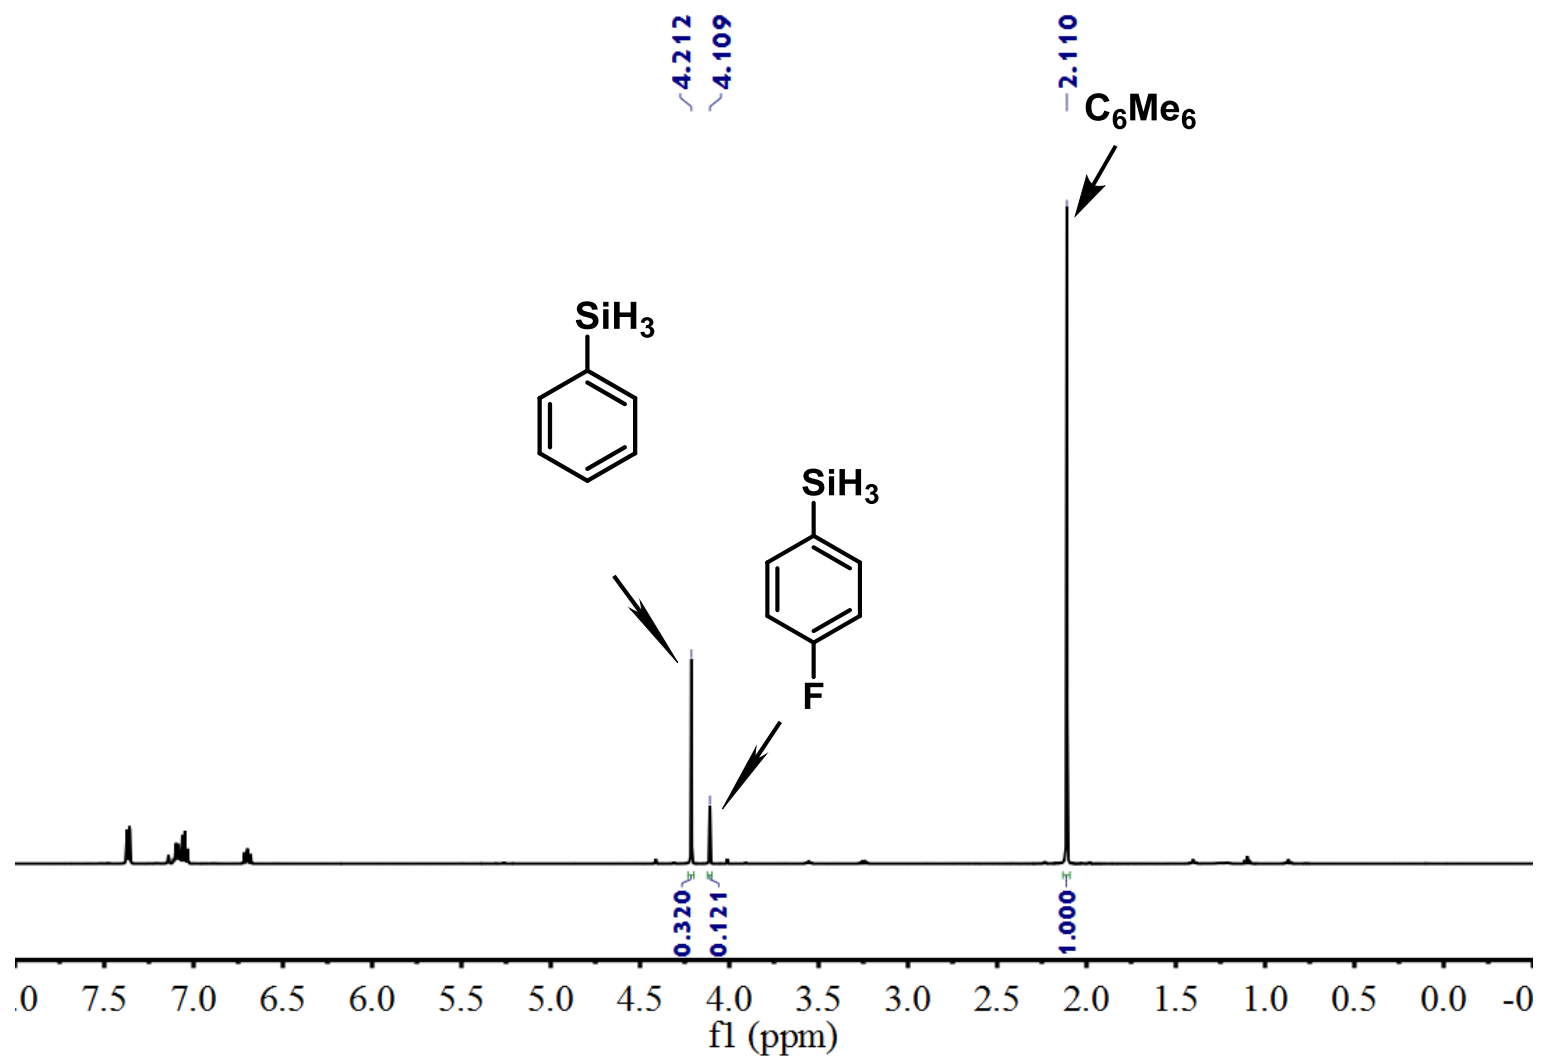

**Figure S33.** Quantitative  $^1\text{H}$  NMR spectrum of the  $\text{C}_6\text{D}_6$  solution of  $4\text{-F-PhSiH}_3$  and  $\text{PhSiH}_3$  (~3 equiv.) for the cross-desilacoupling catalyzed by **1** with hexamethylbenzene as the internal standard (500 MHz,  $\text{C}_6\text{D}_6$ , 25  $^\circ\text{C}$ ).

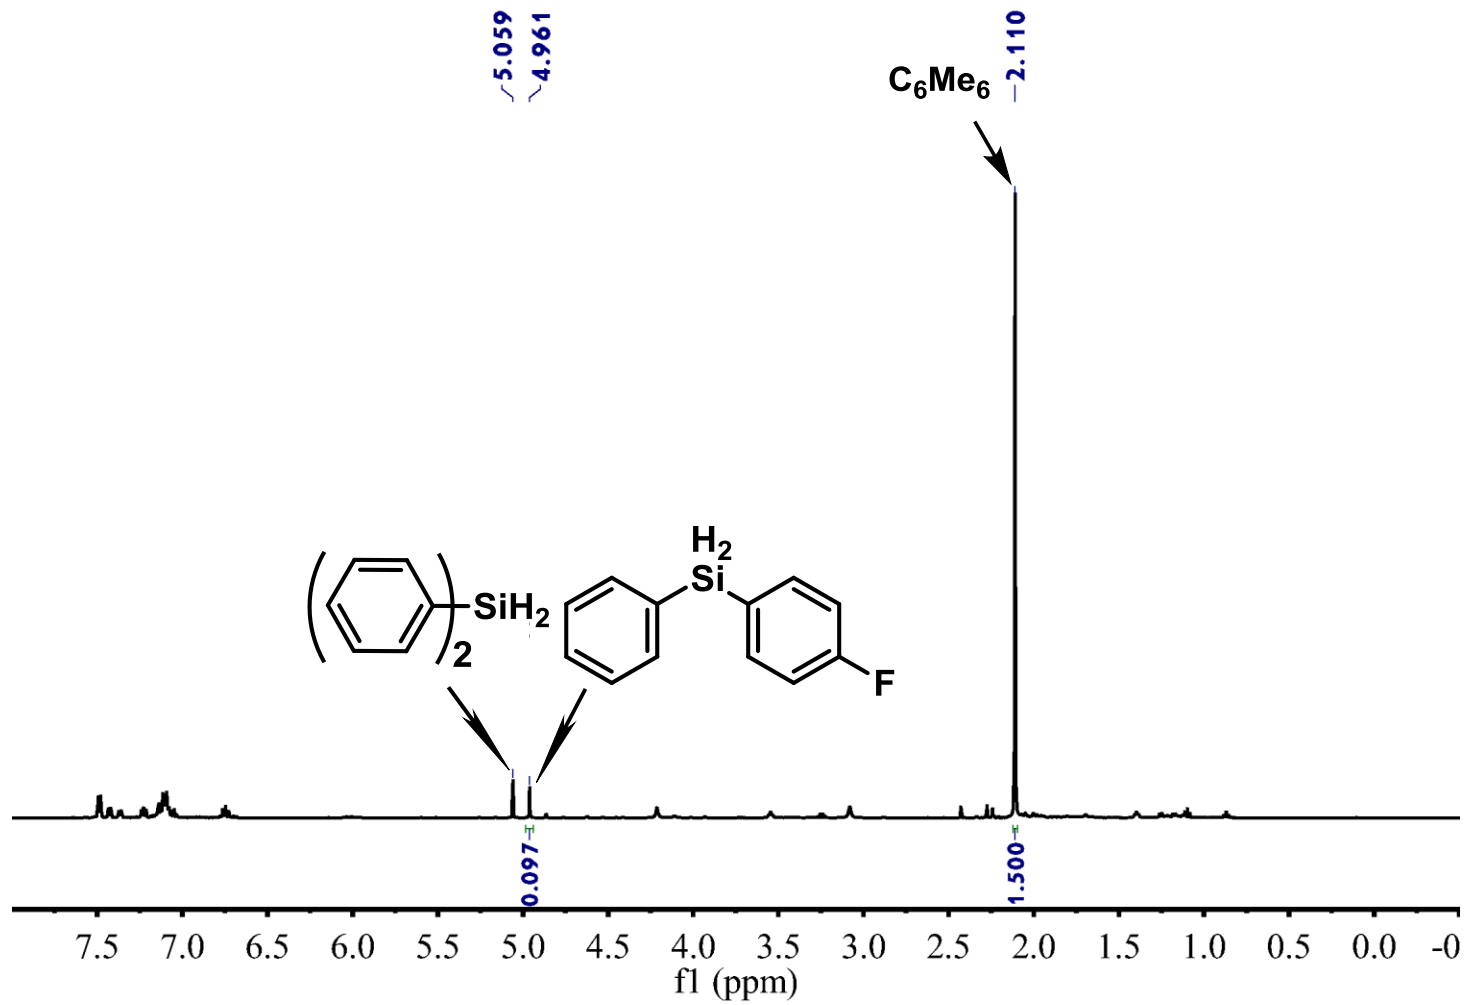

**Figure S34.** Quantitative  $^1\text{H}$  NMR spectrum of the products of the cross-desilacoupling of 4-F-PhSiH<sub>3</sub> and PhSiH<sub>3</sub> (~3 equiv.) catalyzed by **1** at r.t. in 5 min (Table 2) (500 MHz, C<sub>6</sub>D<sub>6</sub>, 25 °C).

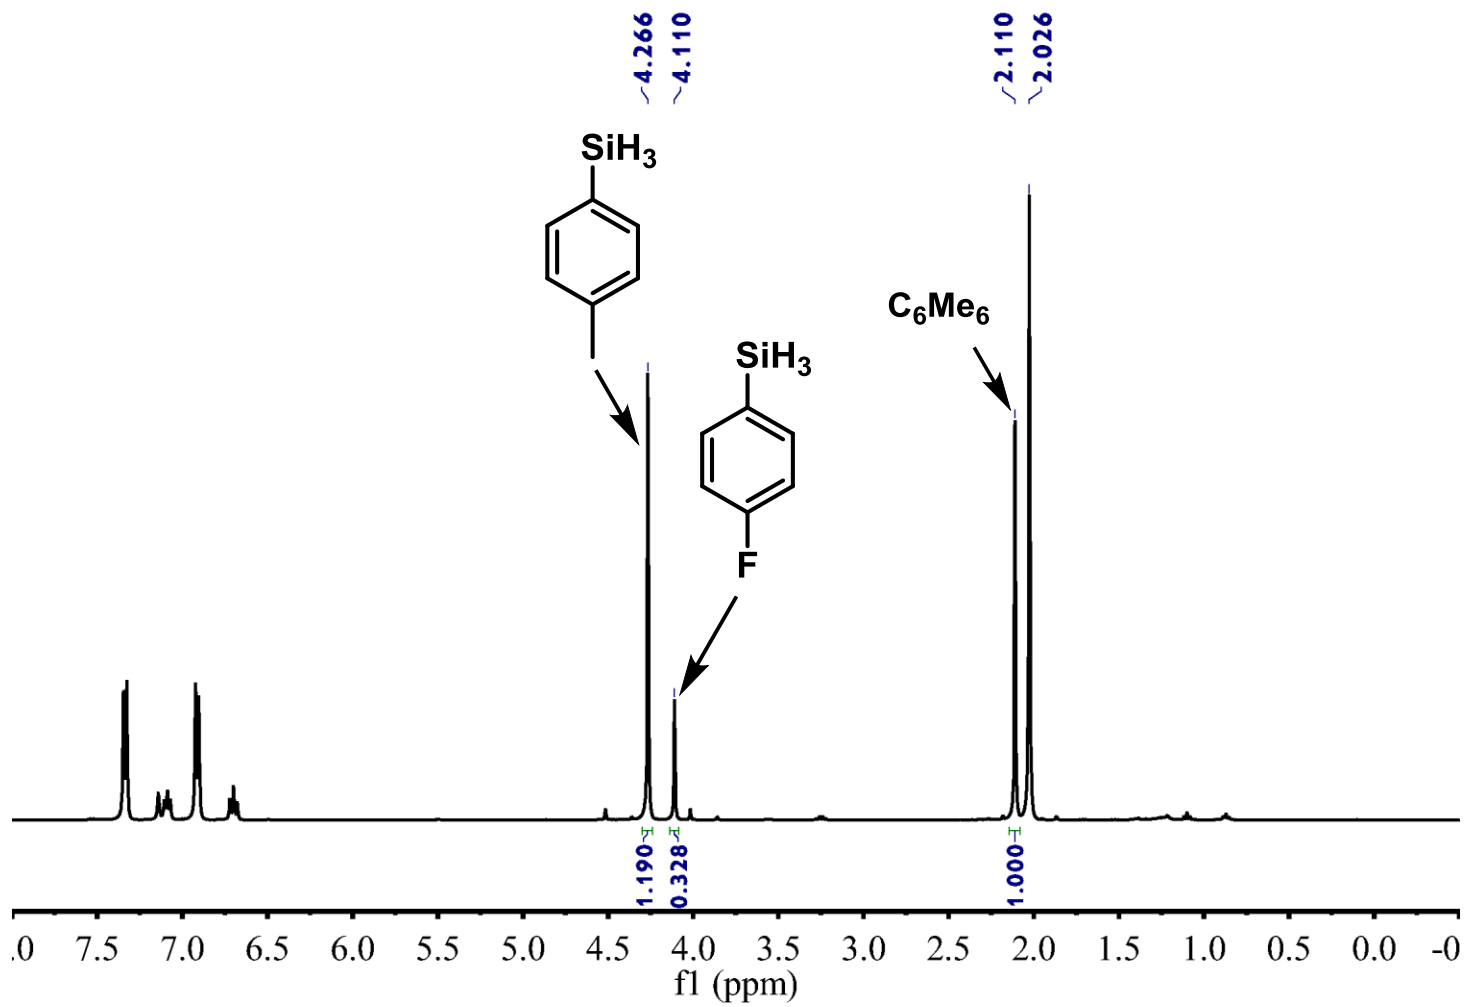

**Figure S35.** Quantitative  $^1\text{H}$  NMR spectrum of the  $\text{C}_6\text{D}_6$  solution of 4-F-PhSiH<sub>3</sub> and 4-Me-PhSiH<sub>3</sub> (~3 equiv.) for the cross-desilacoupling catalyzed by **1** with hexamethylbenzene as the internal standard (500 MHz,  $\text{C}_6\text{D}_6$ , 25 °C).

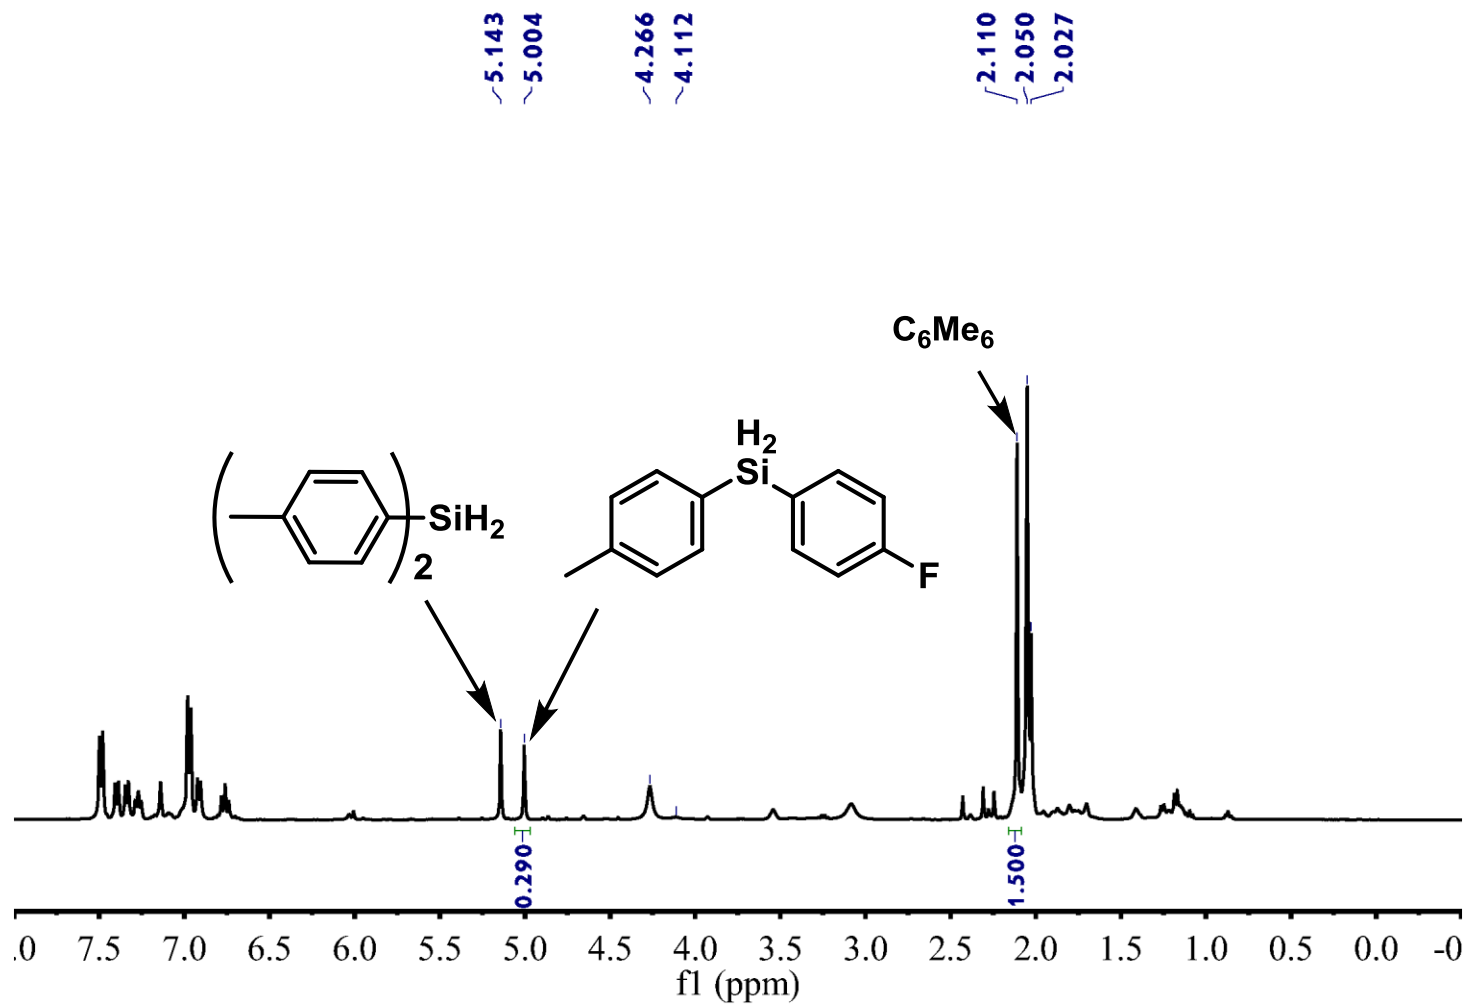

**Figure S36.** Quantitative  $^1\text{H}$  NMR spectrum of the products of the cross-desilacoupling of 4-F-PhSiH<sub>3</sub> and 4-Me-PhSiH<sub>3</sub> (~3 equiv.) catalyzed by **1** at r.t. in 5 min (Table 2) (500 MHz, C<sub>6</sub>D<sub>6</sub>, 25 °C).

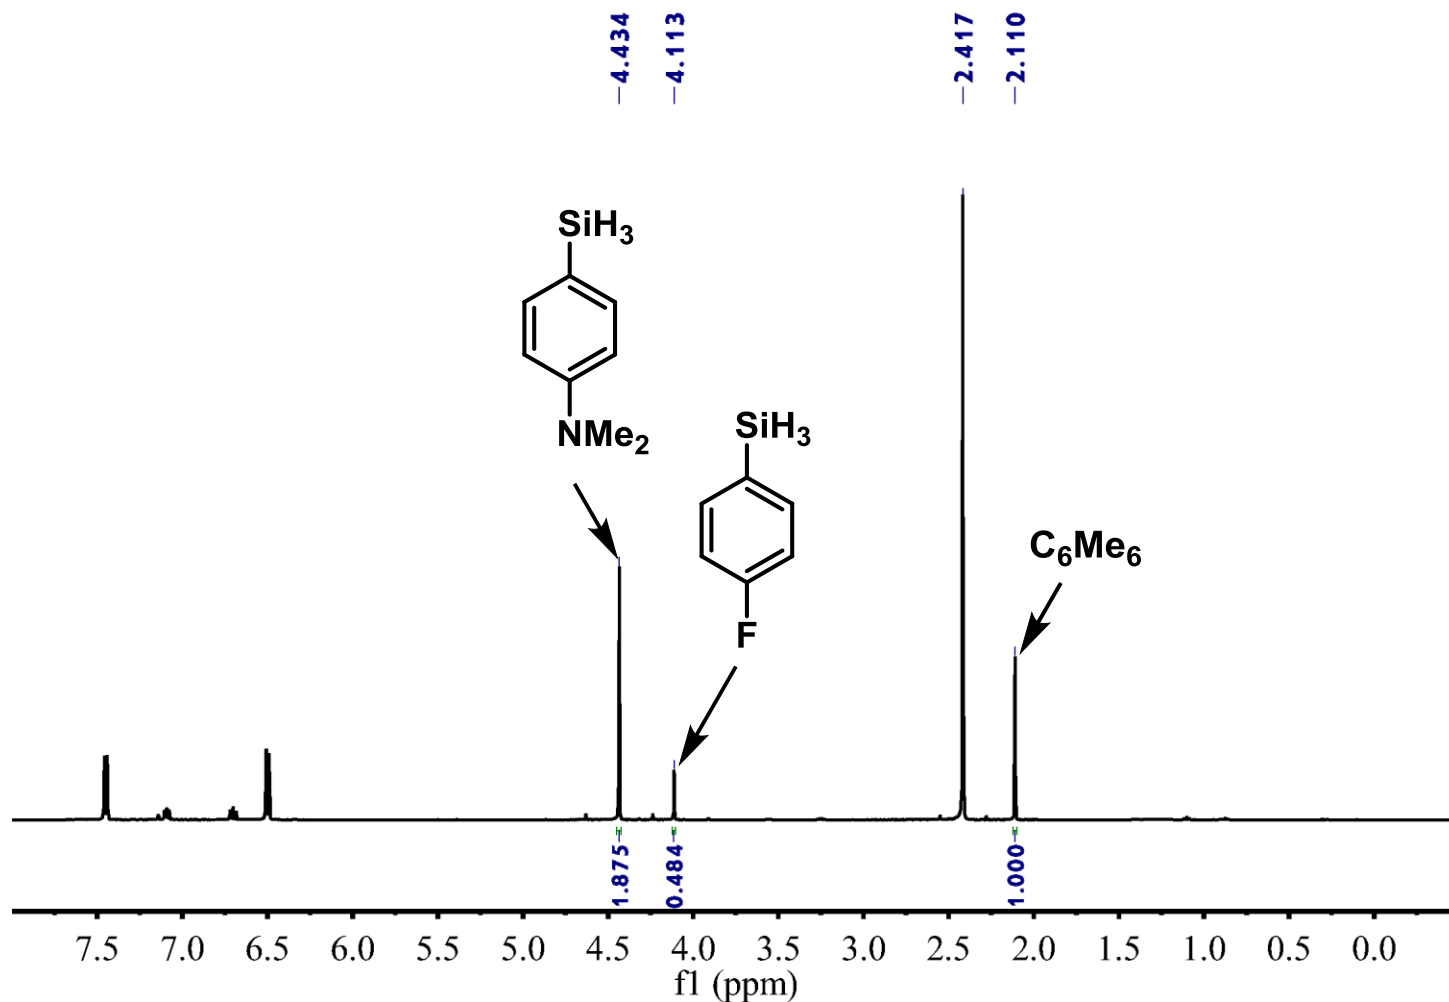

**Figure S37.** Quantitative  $^1\text{H}$  NMR spectrum of the  $\text{C}_6\text{D}_6$  solution of 4-F-PhSiH<sub>3</sub> and 4-NMe<sub>2</sub>-PhSiH<sub>3</sub> (~3 equiv.) for the cross-desilacoupling catalyzed by **1** with hexamethylbenzene as the internal standard (500 MHz,  $\text{C}_6\text{D}_6$ , 25 °C).

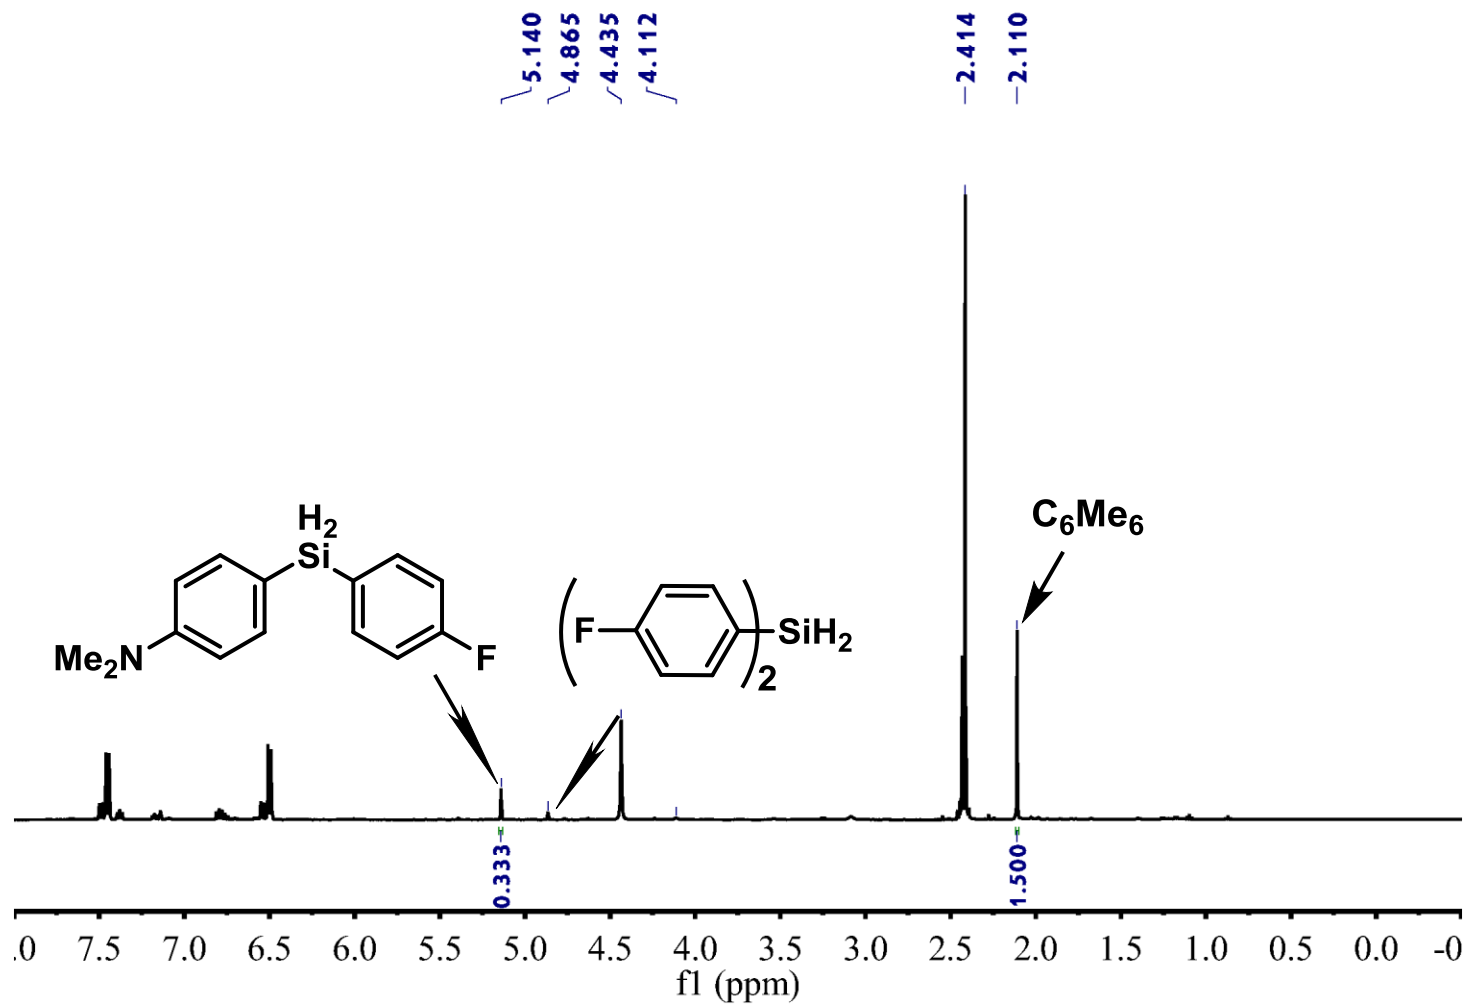

**Figure S38.** Quantitative  $^1\text{H}$  NMR spectrum of the products of the cross-desilacoupling of 4-F-PhSiH<sub>3</sub> and 4-NMe<sub>2</sub>-PhSiH<sub>3</sub> (~3 equiv.) catalyzed by **1** at r.t. in 5 min (Table 2) (500 MHz, C<sub>6</sub>D<sub>6</sub>, 25 °C).



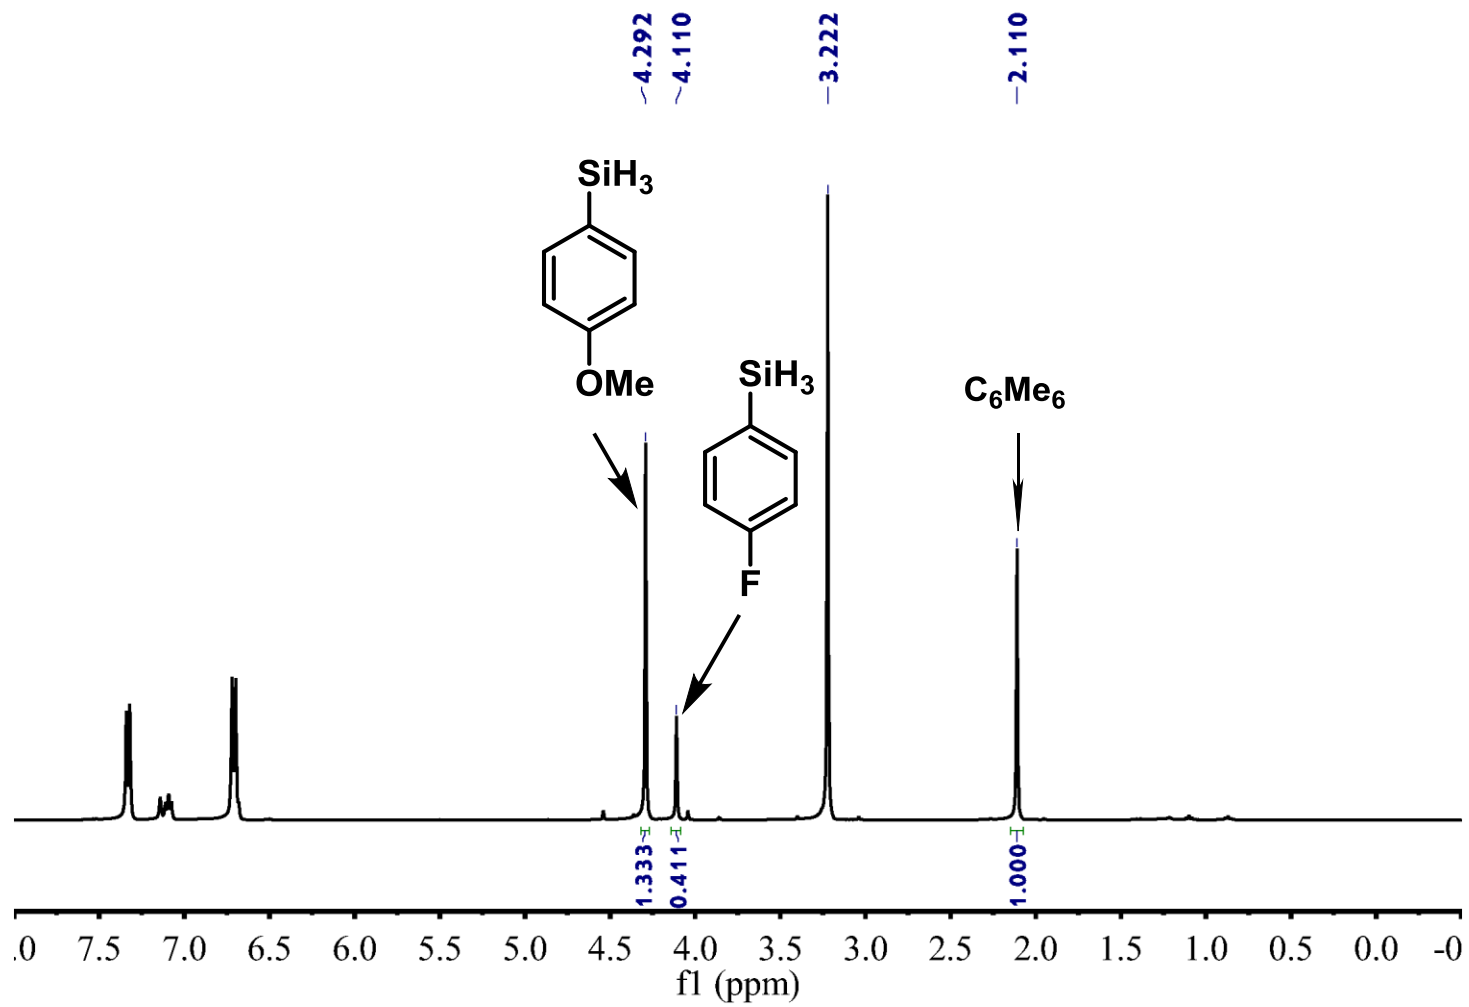

**Figure S39.** Quantitative  $^1\text{H}$  NMR spectrum of the  $\text{C}_6\text{D}_6$  solution of 4-F-PhSiH<sub>3</sub> and 4-MeO-PhSiH<sub>3</sub> (~3 equiv.) for the cross-desilacoupling catalyzed by **1** with hexamethylbenzene as the internal standard (500 MHz,  $\text{C}_6\text{D}_6$ , 25 °C).

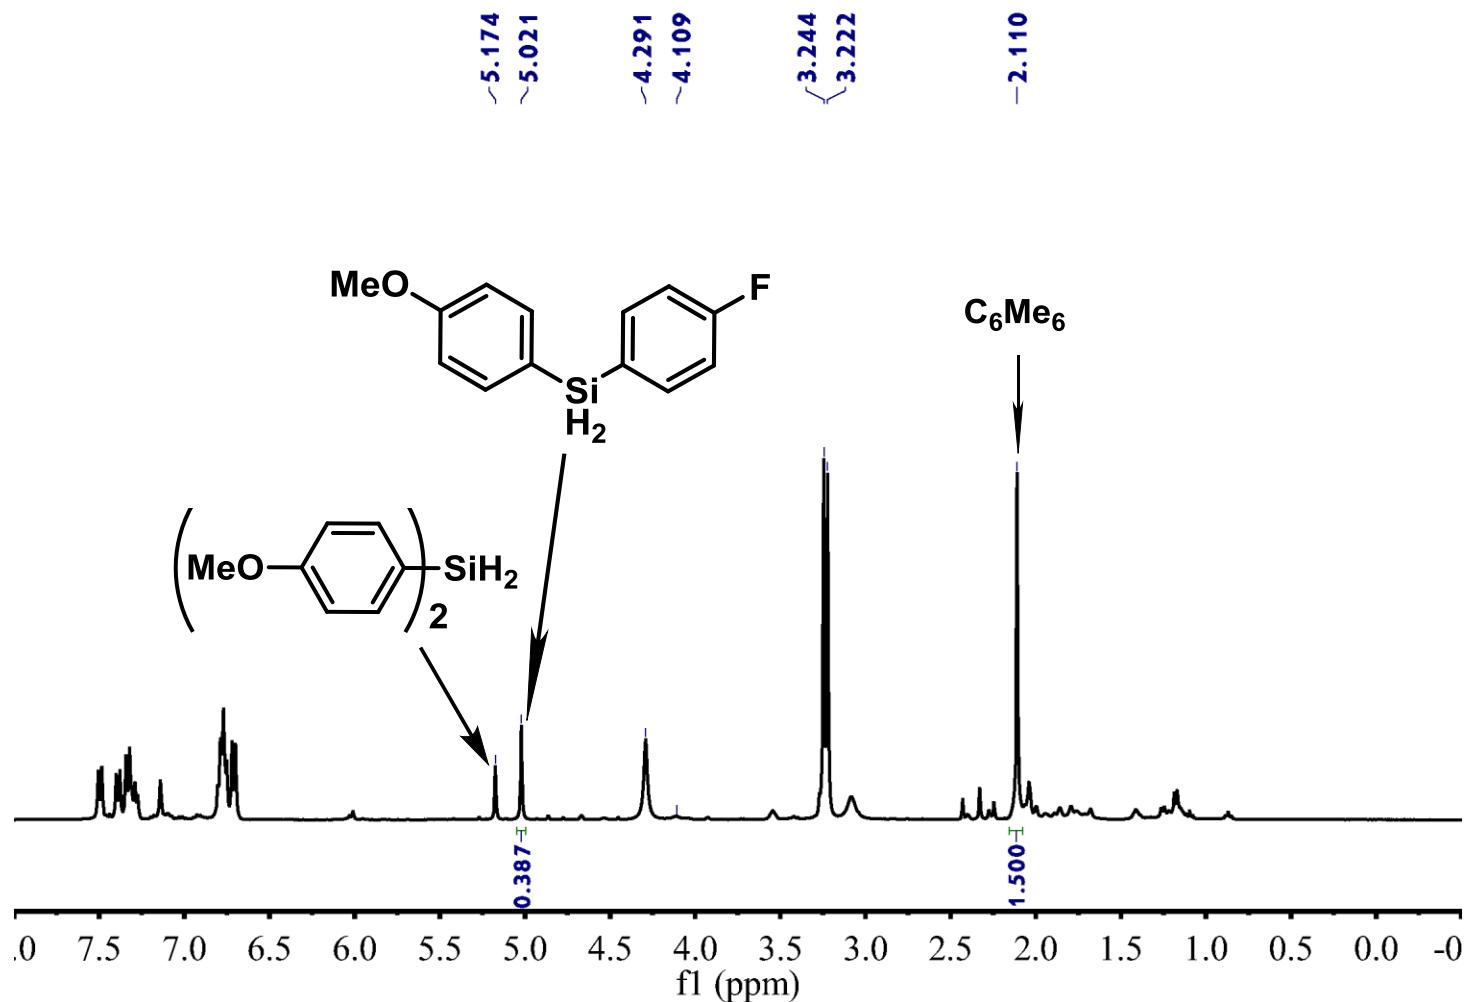

**Figure S40.** Quantitative <sup>1</sup>H NMR spectrum of the products of the cross-desilacoupling of 4-F-PhSiH<sub>3</sub> and 4-MeO-PhSiH<sub>3</sub> (~3 equiv.) catalyzed by **1** at r.t. in 5 min (Table 2) (500 MHz, C<sub>6</sub>D<sub>6</sub>, 25 °C).

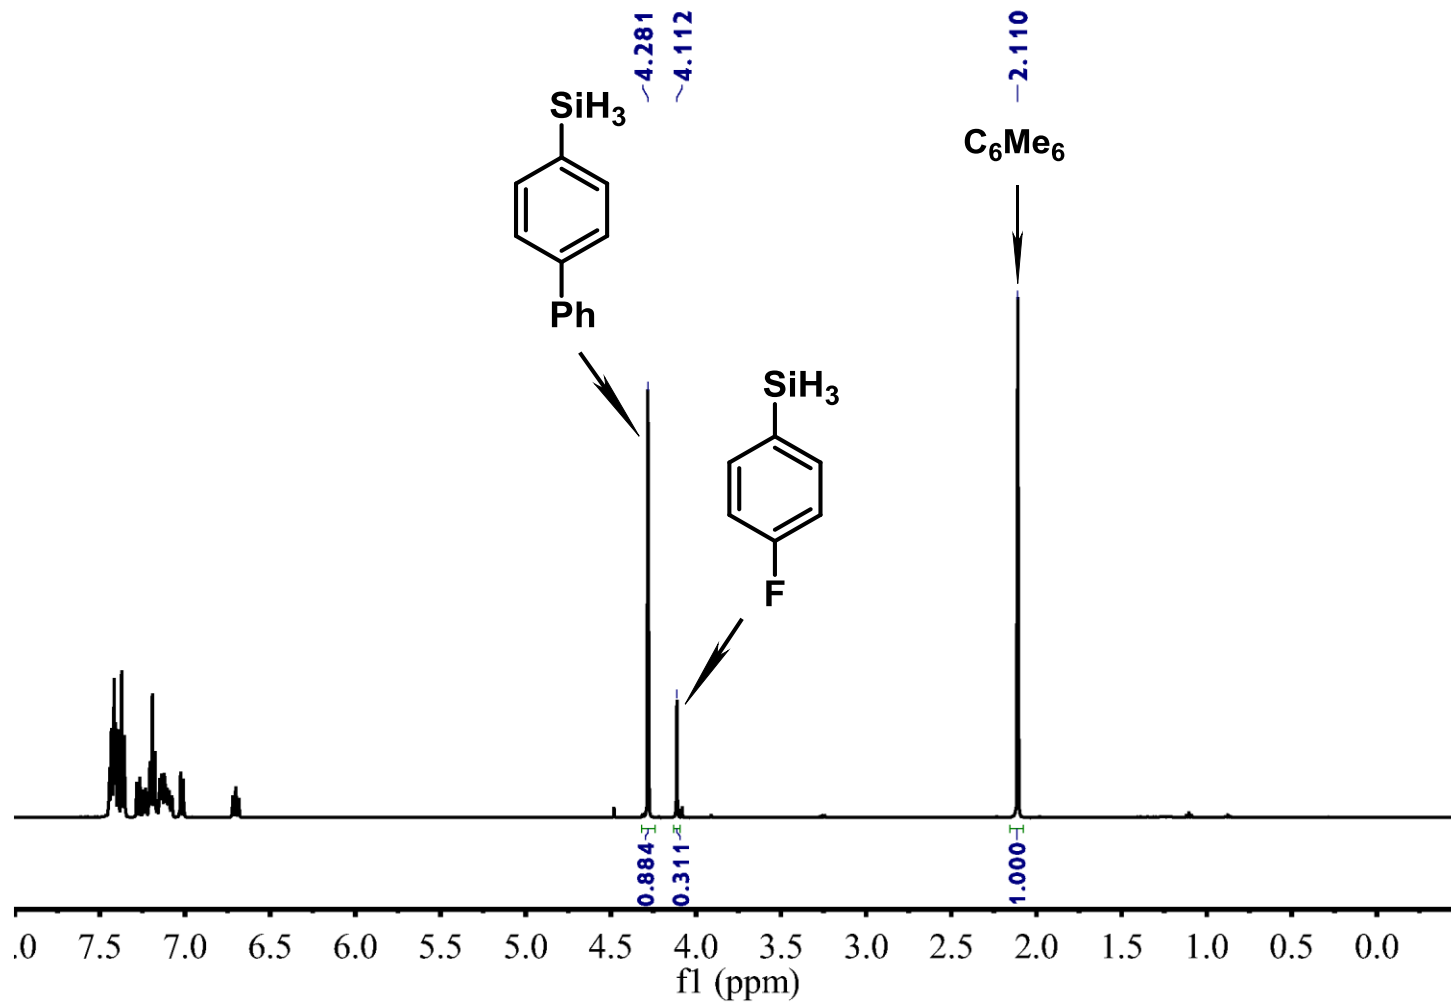

**Figure S41.** Quantitative  $^1\text{H}$  NMR spectrum of the  $\text{C}_6\text{D}_6$  solution of 4-F-PhSiH<sub>3</sub> and 4-Ph-PhSiH<sub>3</sub> (~3 equiv.) for the cross-desilacoupling catalyzed by **1** with hexamethylbenzene as the internal standard (500 MHz,  $\text{C}_6\text{D}_6$ , 25 °C).

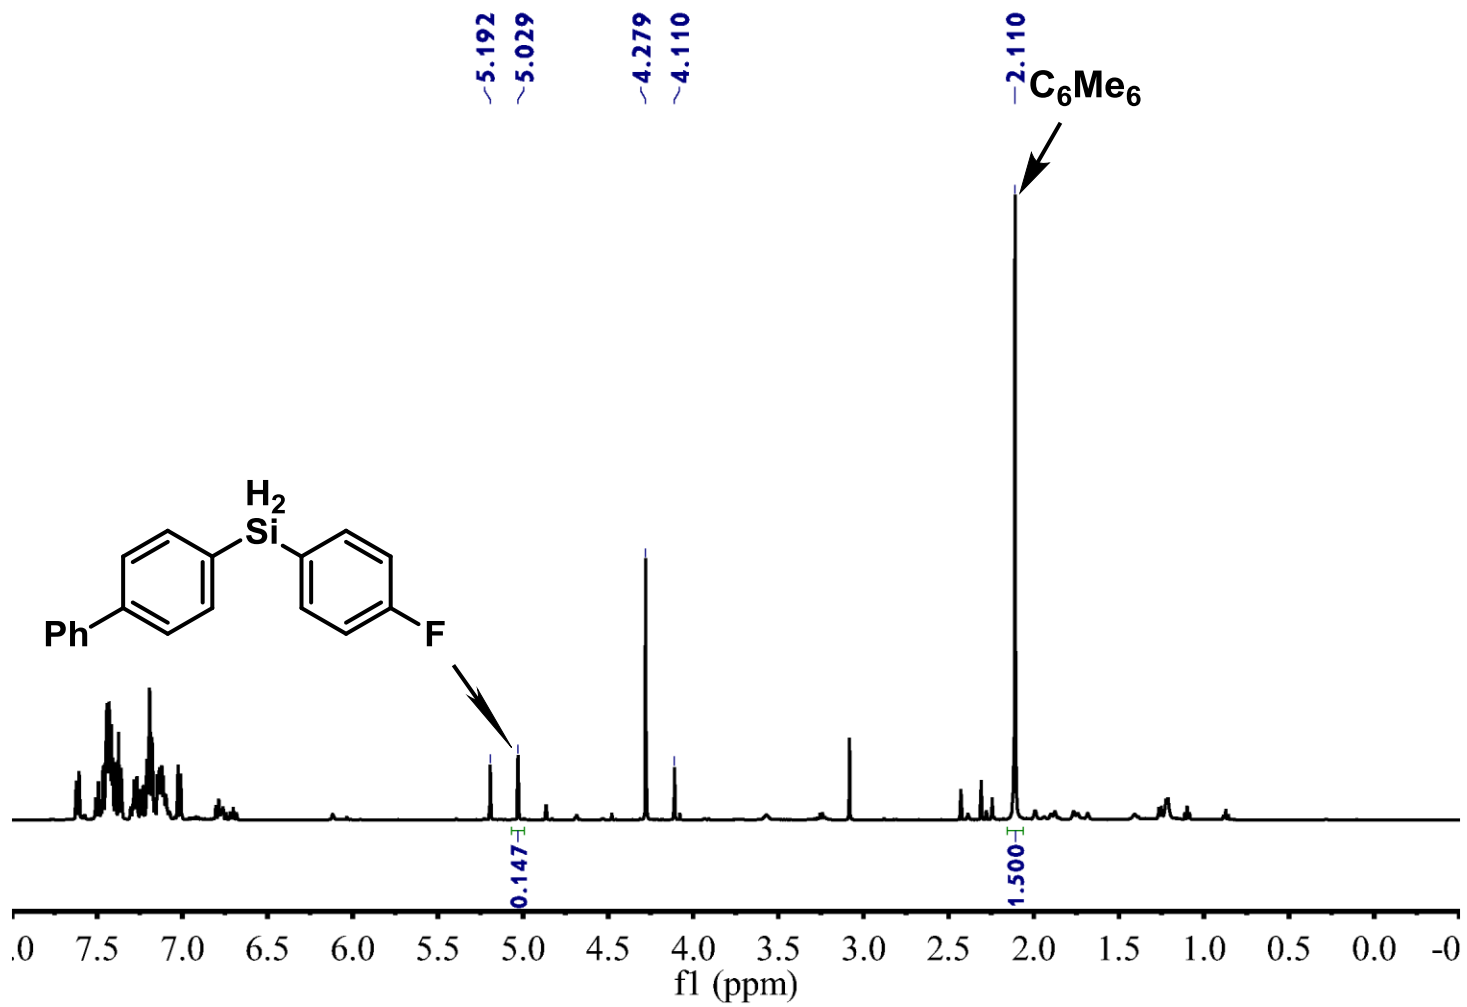

**Figure S42.** Quantitative  $^1\text{H}$  NMR spectrum of the products of the cross-desilacoupling of 4-F-PhSiH<sub>3</sub> and 4-Ph-PhSiH<sub>3</sub> (~3 equiv.) catalyzed by **1** at r.t. in 5 min (Table 2) (500 MHz, C<sub>6</sub>D<sub>6</sub>, 25 °C).

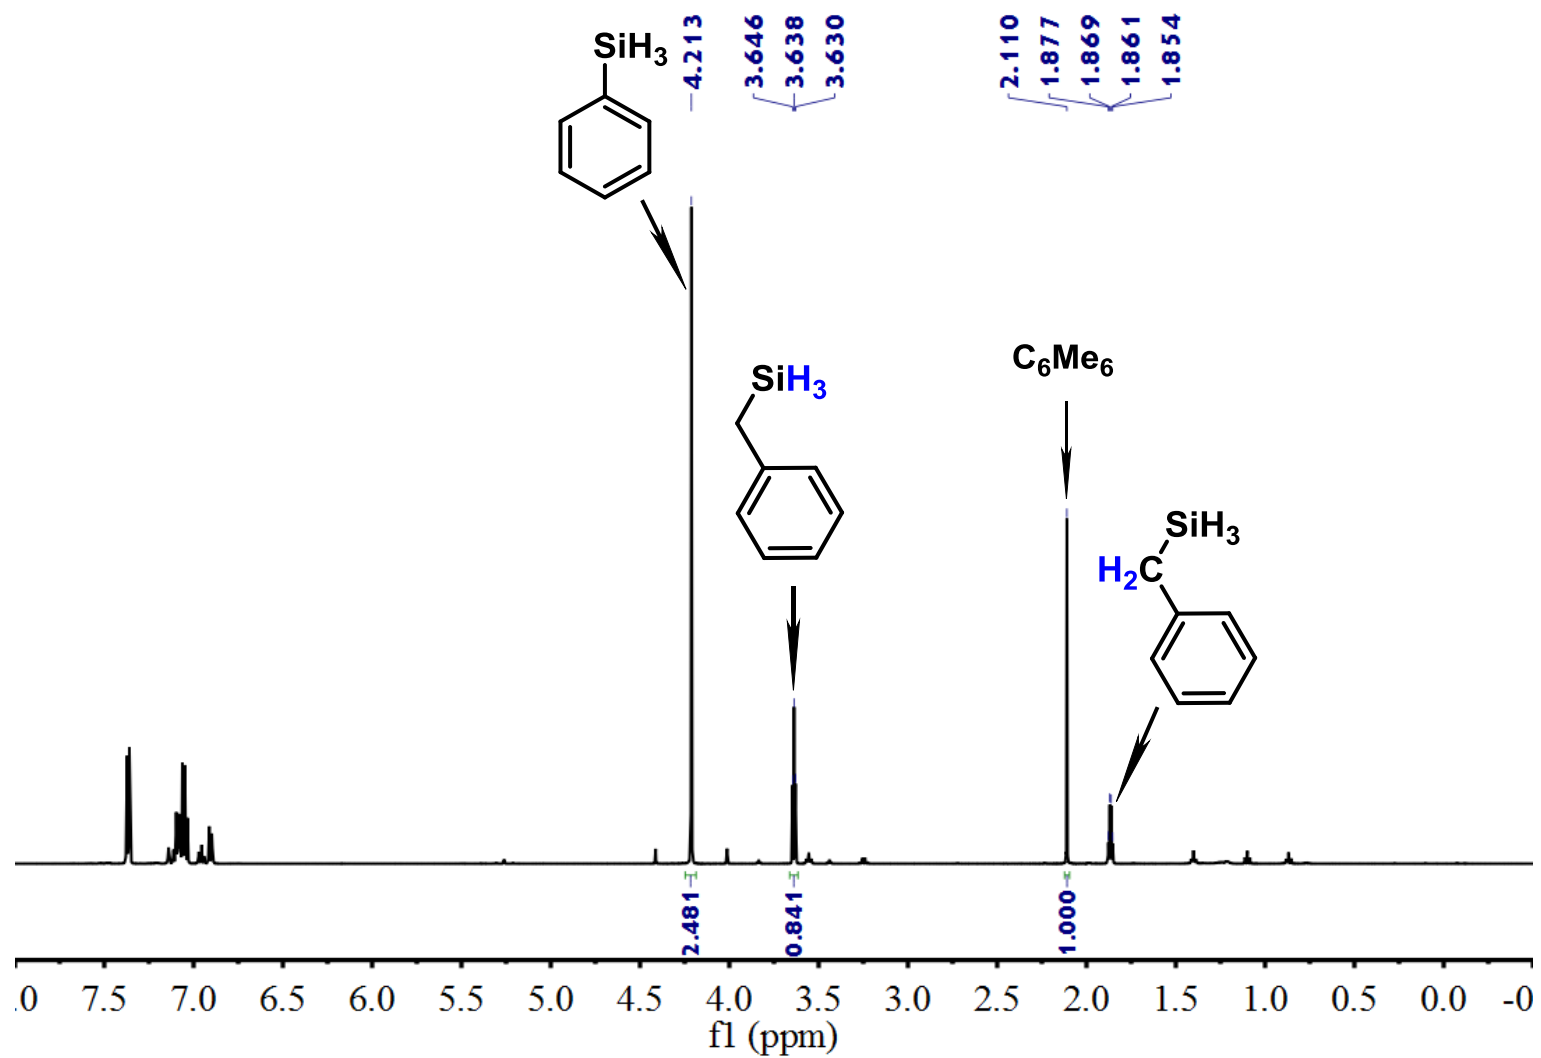

**Figure S43.** Quantitative  $^1\text{H}$  NMR spectrum of the  $\text{C}_6\text{D}_6$  solution of benzylsilane and  $\text{PhSiH}_3$  (~3 equiv.) for the cross-desilacoupling catalyzed by **1** with hexamethylbenzene as the internal standard (500 MHz,  $\text{C}_6\text{D}_6$ , 25 °C).

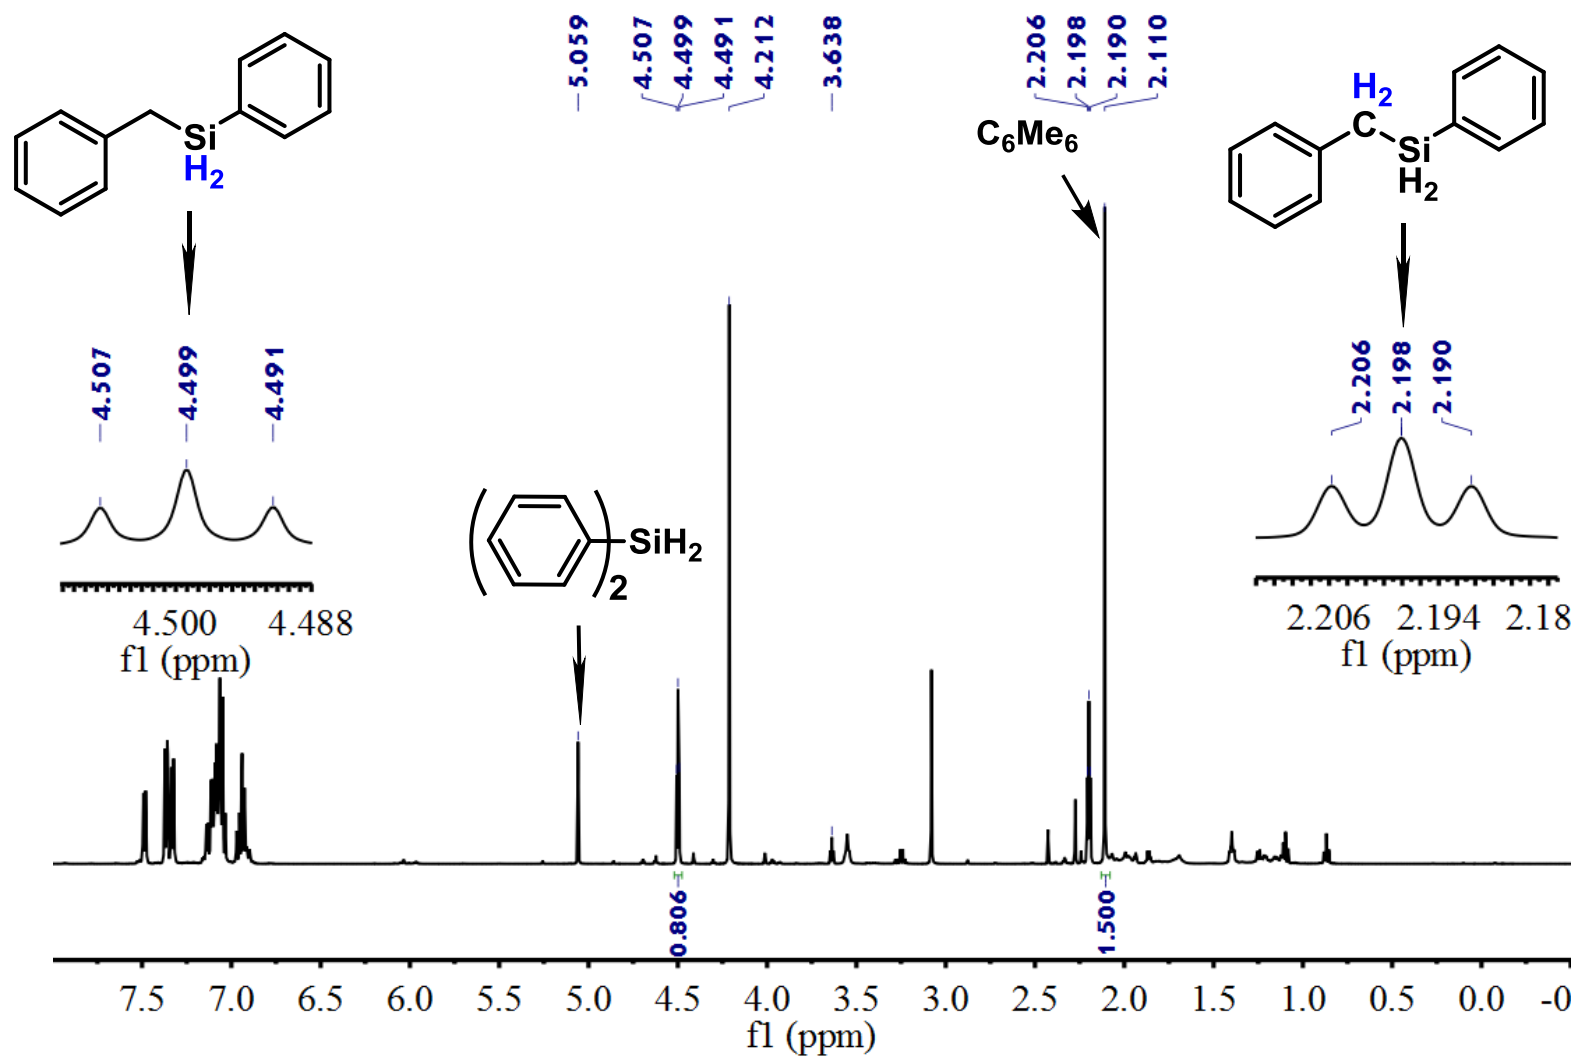

**Figure S44.** Quantitative  $^1\text{H}$  NMR spectrum of the products of the cross-desilacoupling of benzylsilane and  $\text{PhSiH}_3$  (~3 equiv.) catalyzed by **1** at r.t. in 10 min (Table 3) (500 MHz,  $\text{C}_6\text{D}_6$ , 25  $^\circ\text{C}$ ).

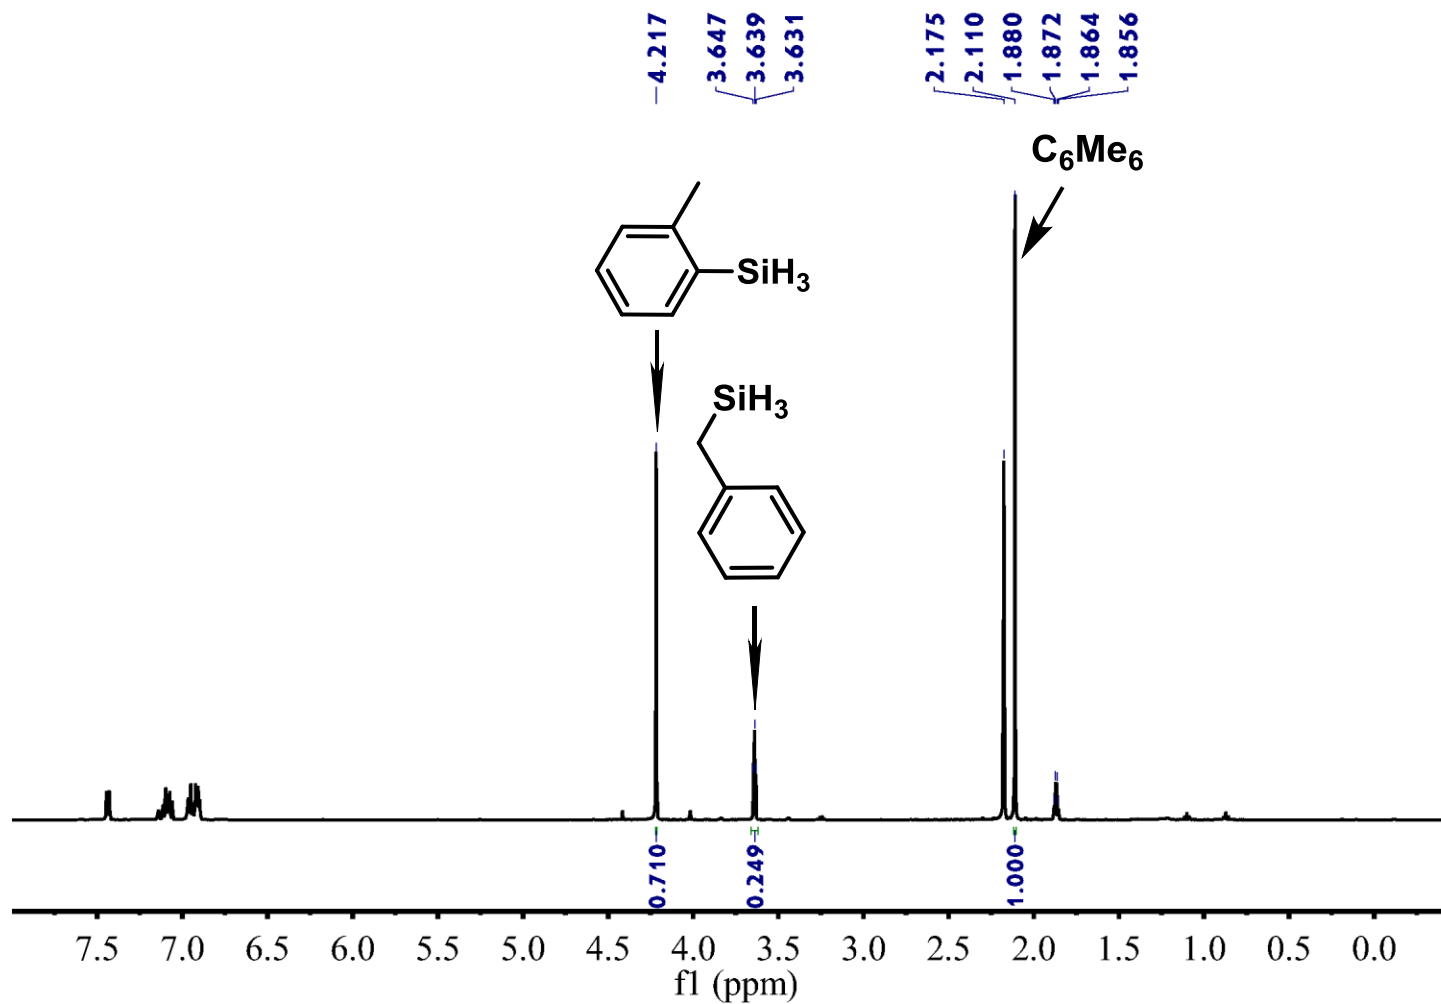

**Figure S45.** Quantitative  $^1\text{H}$  NMR spectrum of the  $\text{C}_6\text{D}_6$  solution of benzylsilane and 2-Me-PhSiH $_3$  (~3 equiv.) for the cross-desilacoupling catalyzed by **1** with hexamethylbenzene as the internal standard (500 MHz,  $\text{C}_6\text{D}_6$ , 25  $^\circ\text{C}$ ).

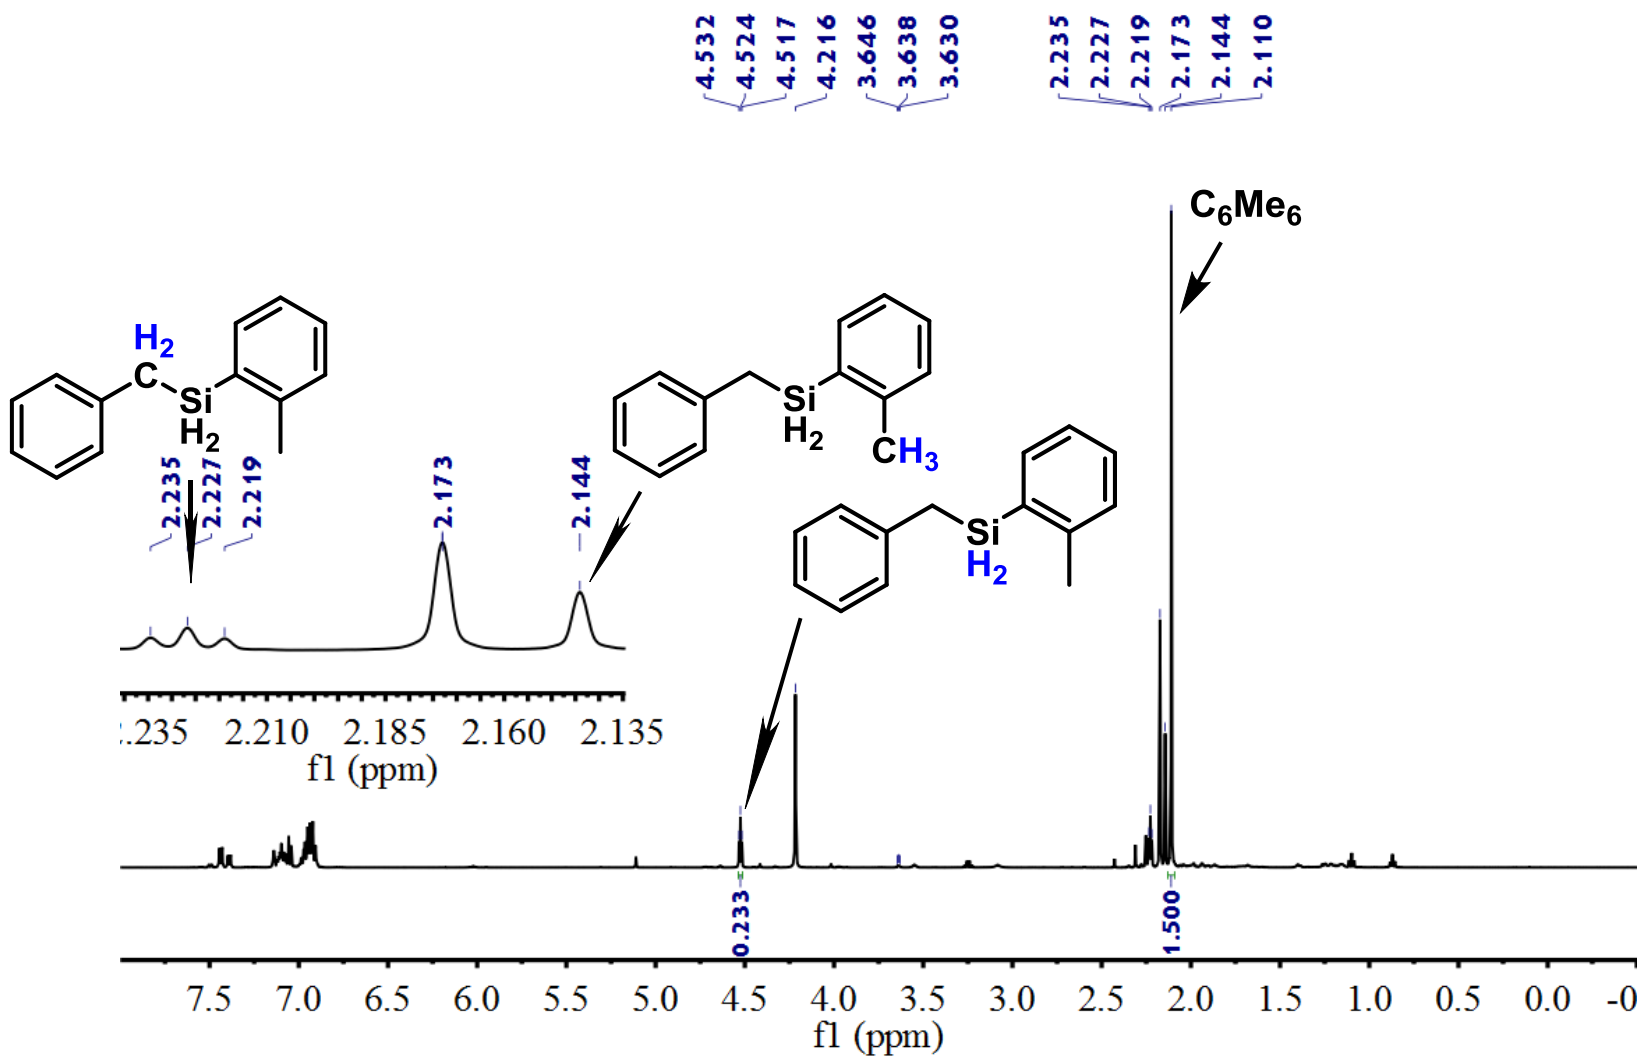

**Figure S46.** Quantitative <sup>1</sup>H NMR spectrum of the products of the cross-desilacoupling of benzylsilane and 2-Me-PhSiH<sub>3</sub> (~3 equiv.) catalyzed by **1** at r.t. in 10 min (Table 3) (500 MHz, C<sub>6</sub>D<sub>6</sub>, 25 °C).



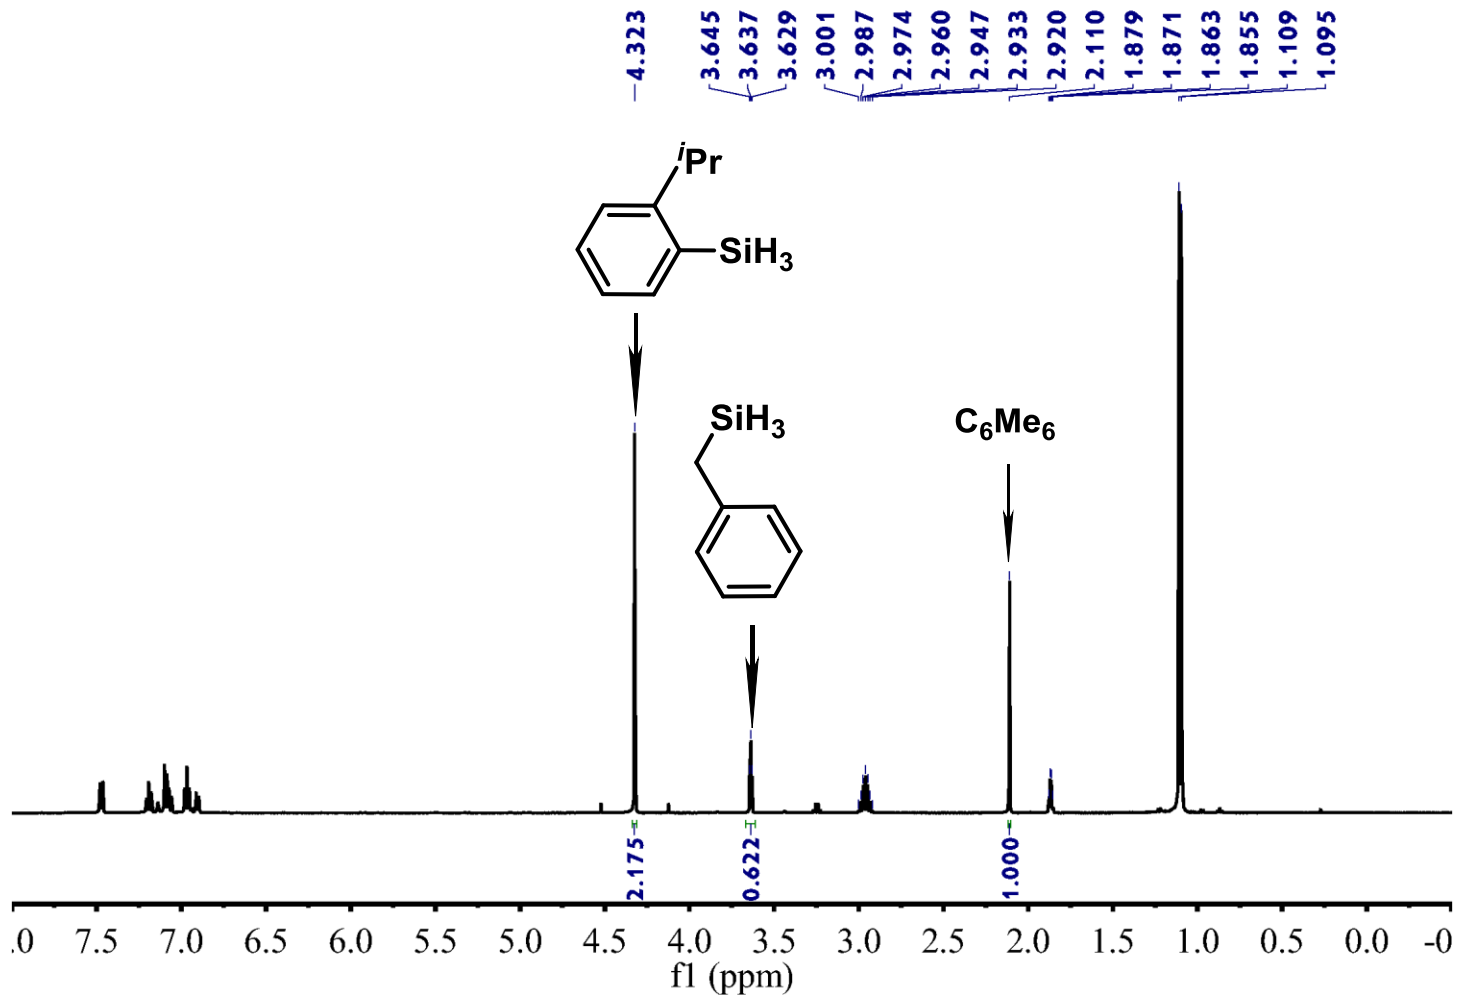

**Figure S47.** Quantitative <sup>1</sup>H NMR spectrum of the C<sub>6</sub>D<sub>6</sub> solution of benzylsilane and 2-*i*-Pr-PhSiH<sub>3</sub> (~3 equiv.) for the cross-desilacoupling catalyzed by **1** with hexamethylbenzene as the internal standard (500 MHz, C<sub>6</sub>D<sub>6</sub>, 25 °C).

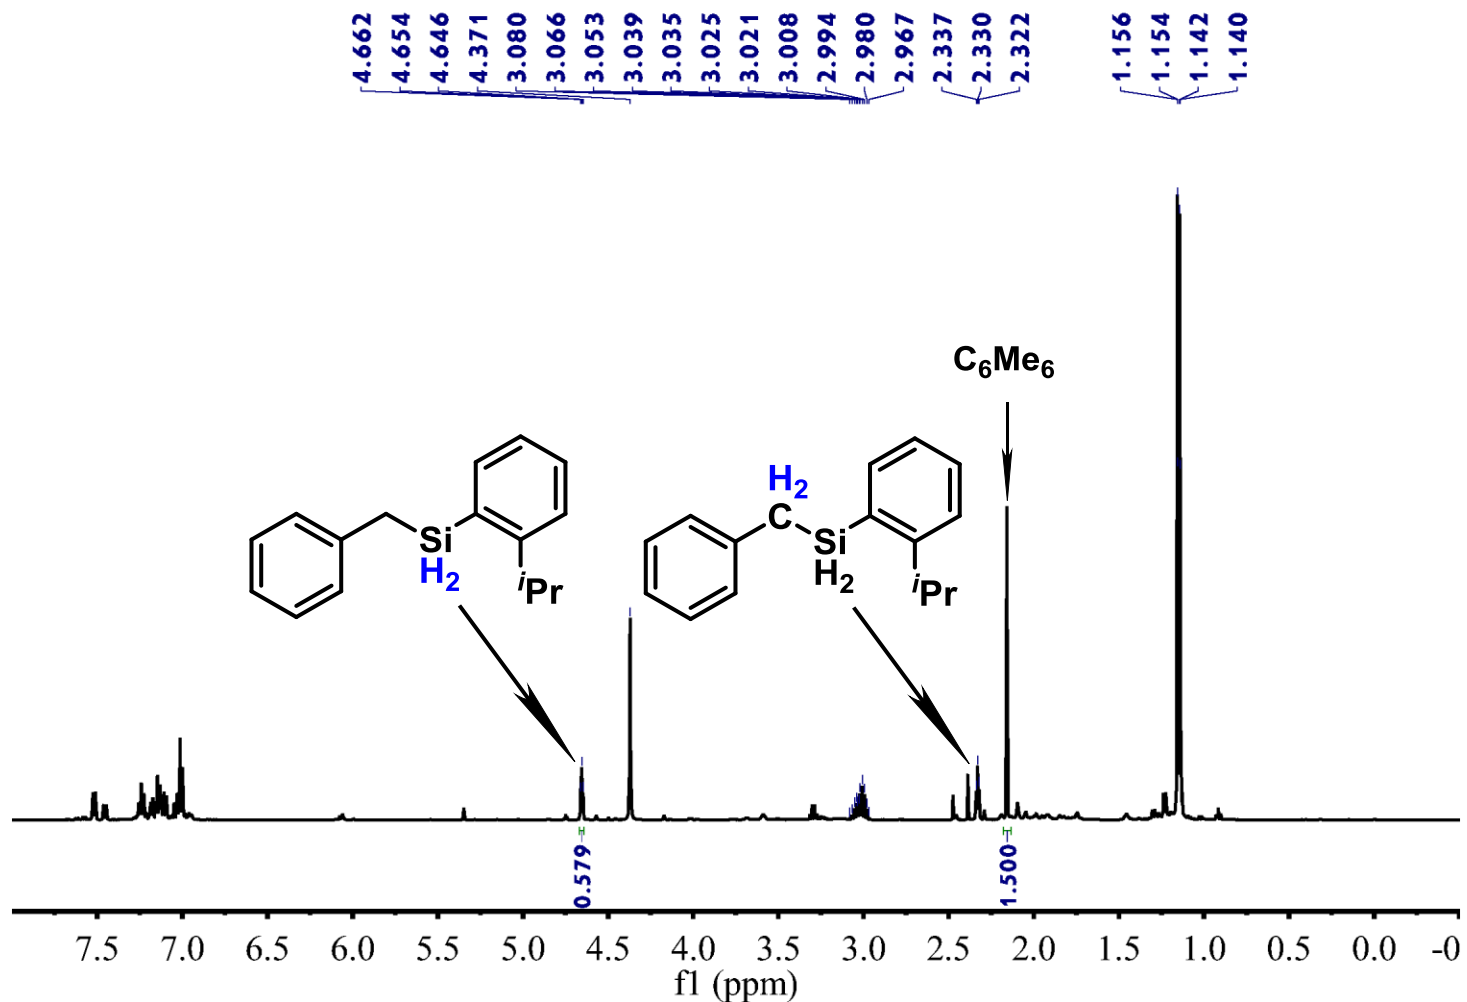

**Figure S48.** Quantitative <sup>1</sup>H NMR spectrum of the products of the cross-desilacoupling of benzylsilane and 2-*i*-Pr-PhSiH<sub>3</sub> (~3 equiv.) catalyzed by **1** at r.t. in 10 min (Table 3) (500 MHz, C<sub>6</sub>D<sub>6</sub>, 25 °C).

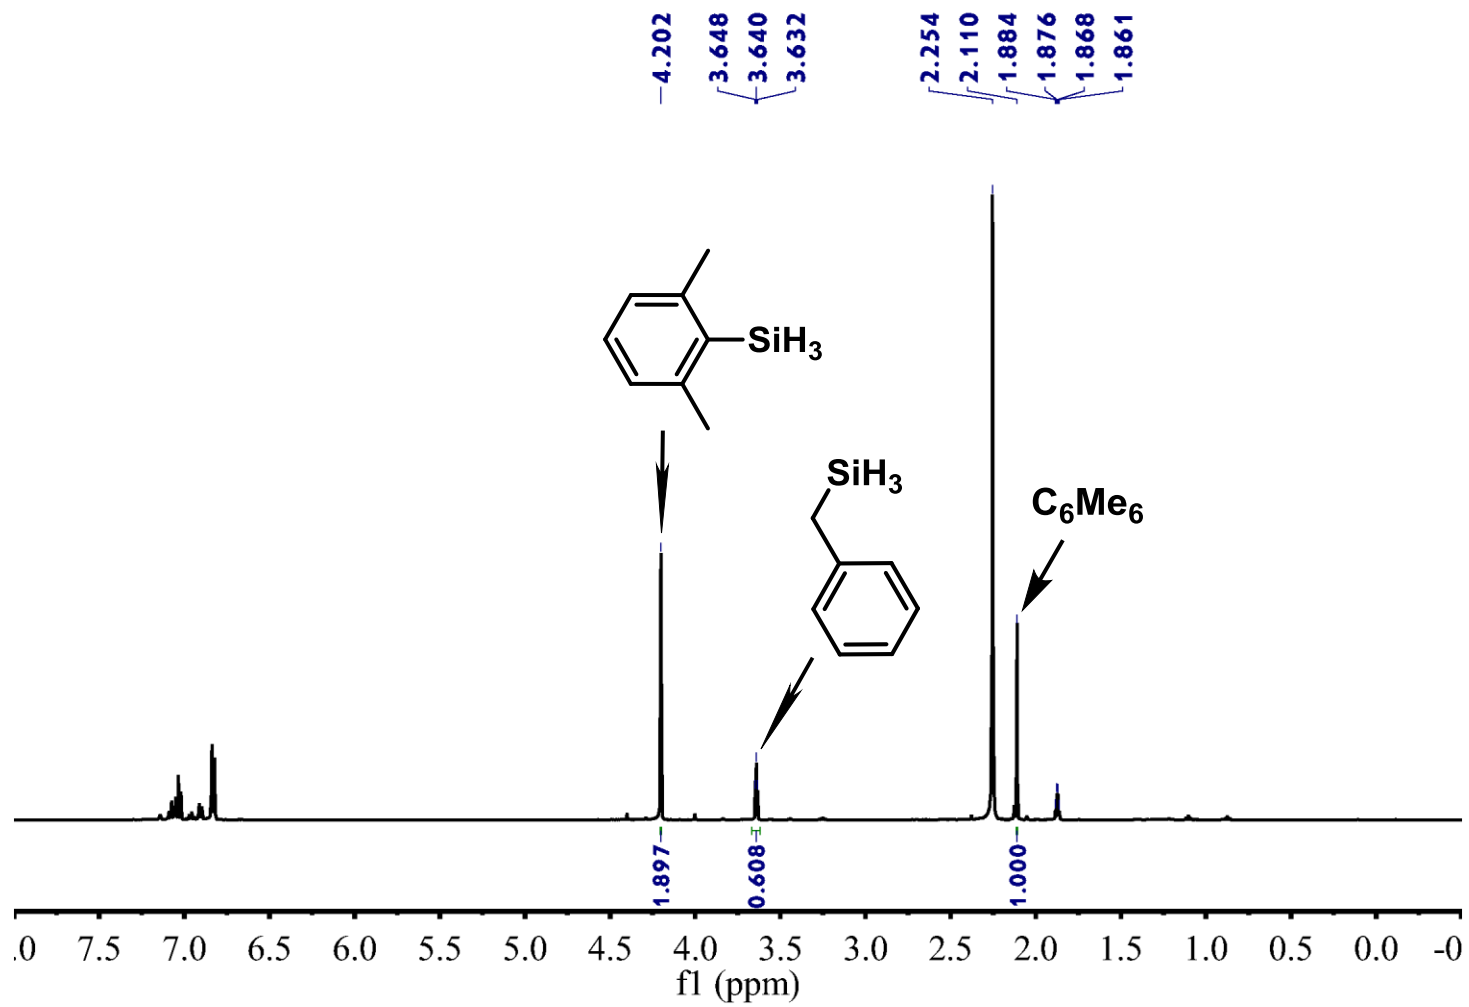

**Figure S49.** Quantitative  $^1H$  NMR spectrum of the  $C_6D_6$  solution of benzylsilane and 2,6- $Me_2$ -PhSiH $_3$  (~3 equiv.) for the cross-desilacoupling catalyzed by **1** with hexamethylbenzene as the internal standard (500 MHz,  $C_6D_6$ , 25  $^\circ C$ ).

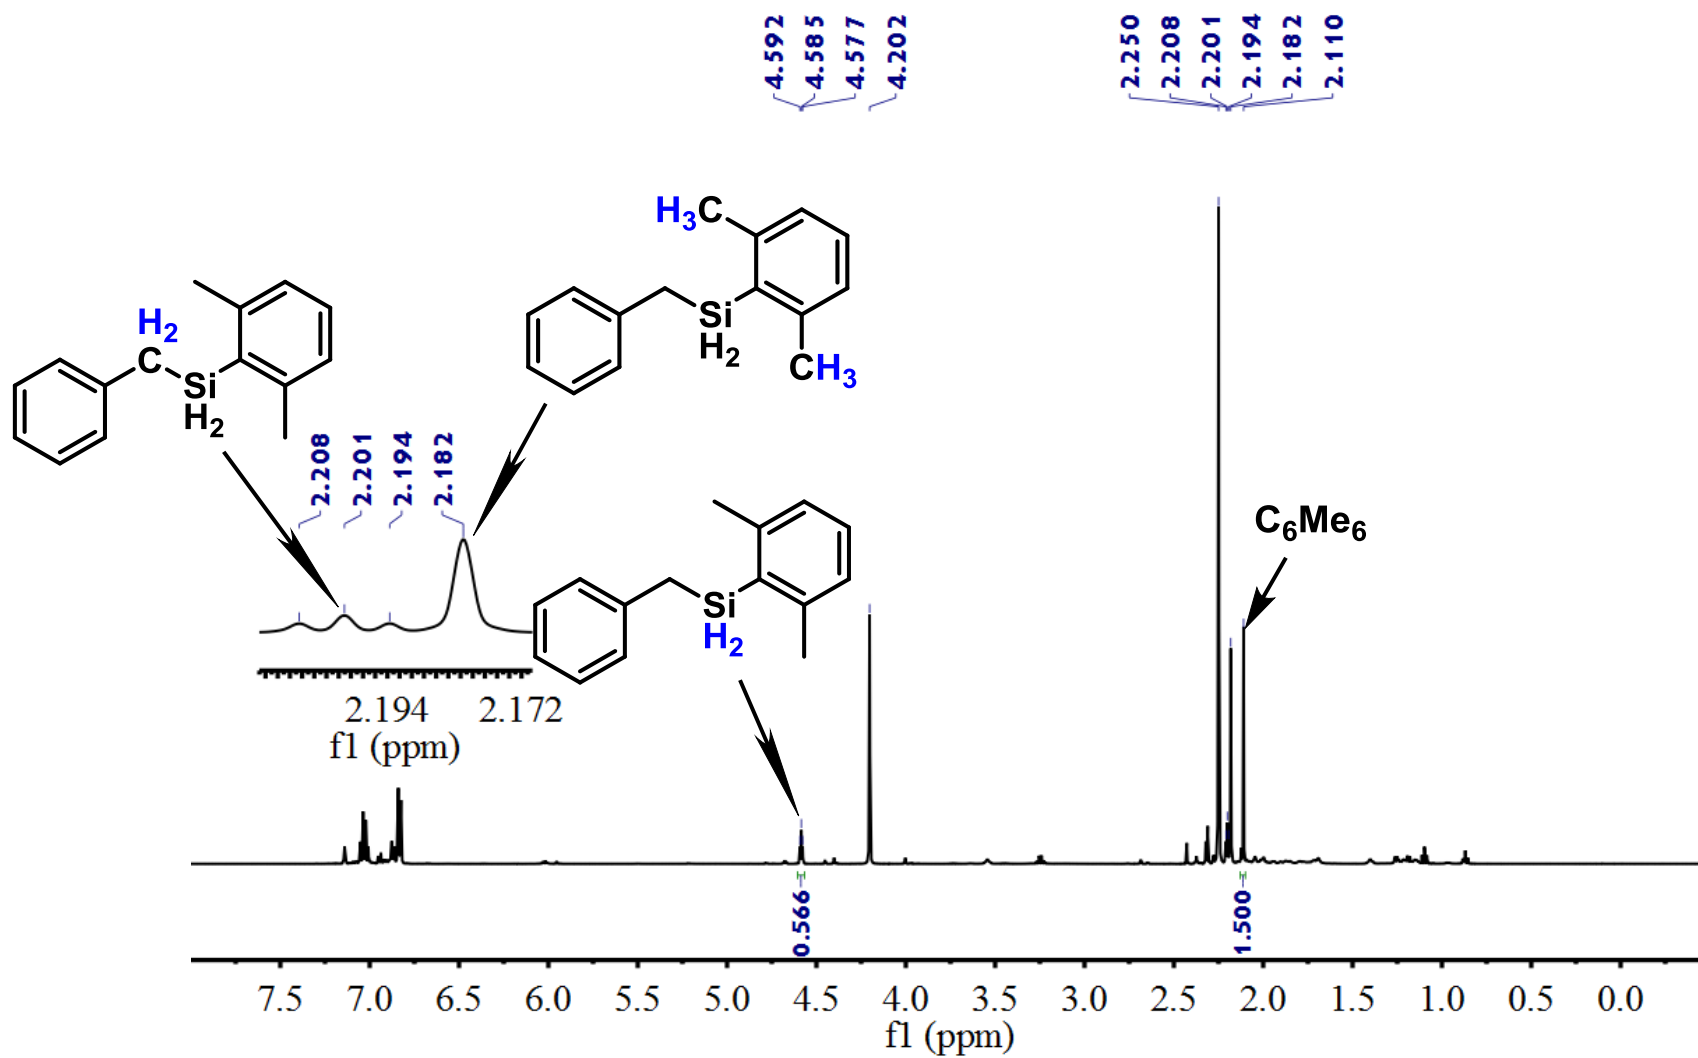

**Figure S50.** Quantitative  $^1\text{H}$  NMR spectrum of the products of the cross-desilacoupling of benzylsilane and 2,6-Me<sub>2</sub>-PhSiH<sub>3</sub> (~3 equiv.) catalyzed by **1** at r.t. in 10 min (Table 3) (500 MHz, C<sub>6</sub>D<sub>6</sub>, 25 °C).

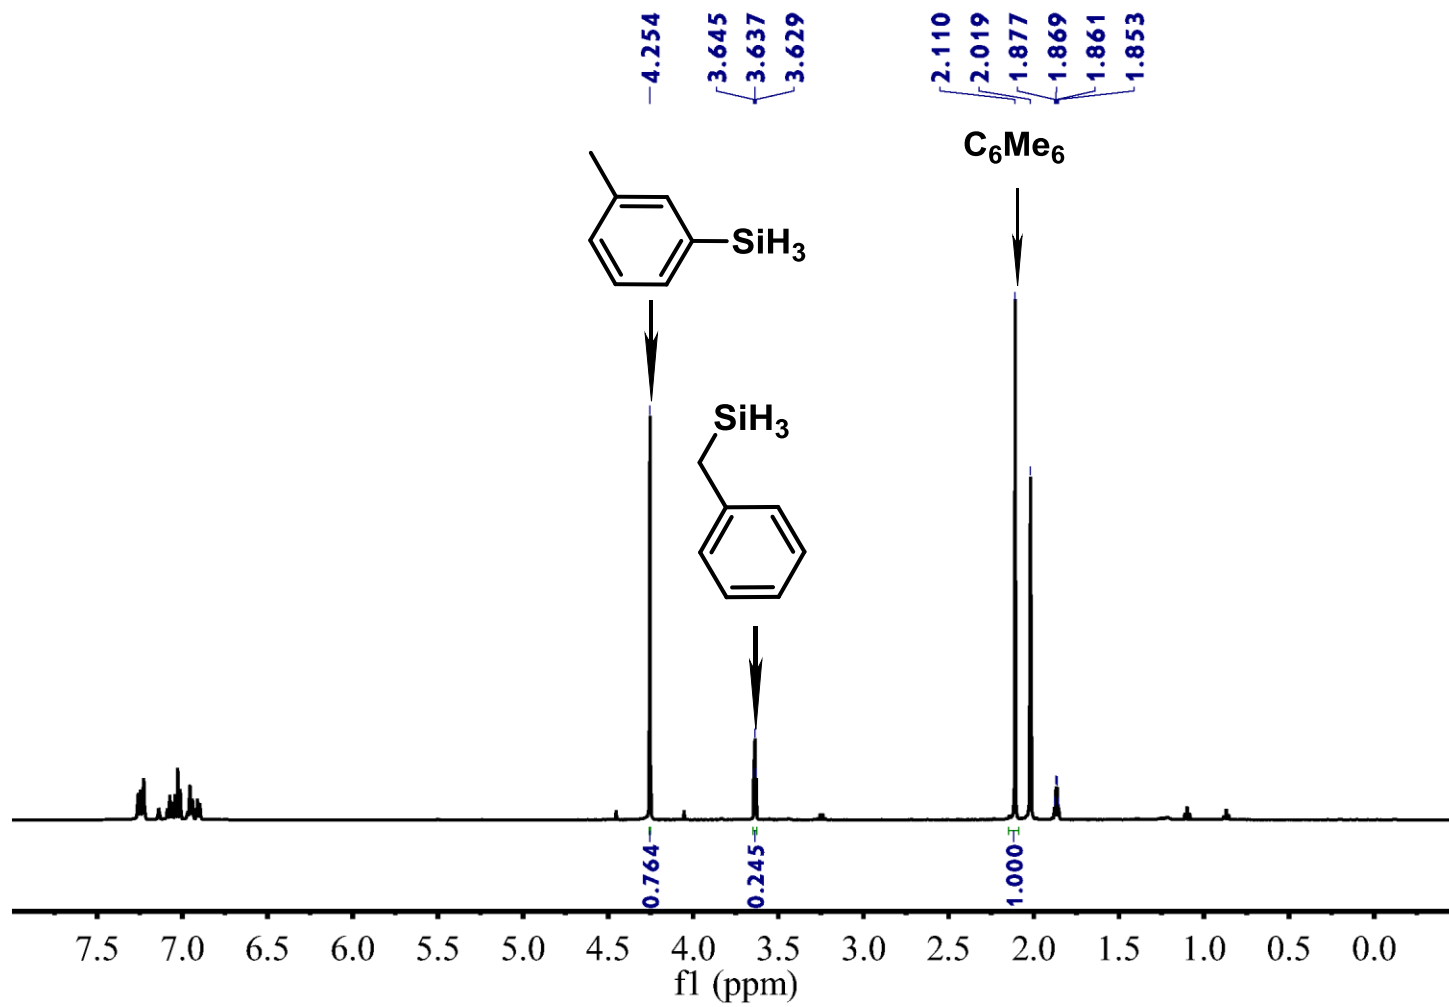

**Figure S51.** Quantitative <sup>1</sup>H NMR spectrum of the C<sub>6</sub>D<sub>6</sub> solution of benzylsilane and 3-Me-PhSiH<sub>3</sub> (~3 equiv.) for the cross-desilacoupling catalyzed by **1** with hexamethylbenzene as the internal standard (500 MHz, C<sub>6</sub>D<sub>6</sub>, 25 °C).

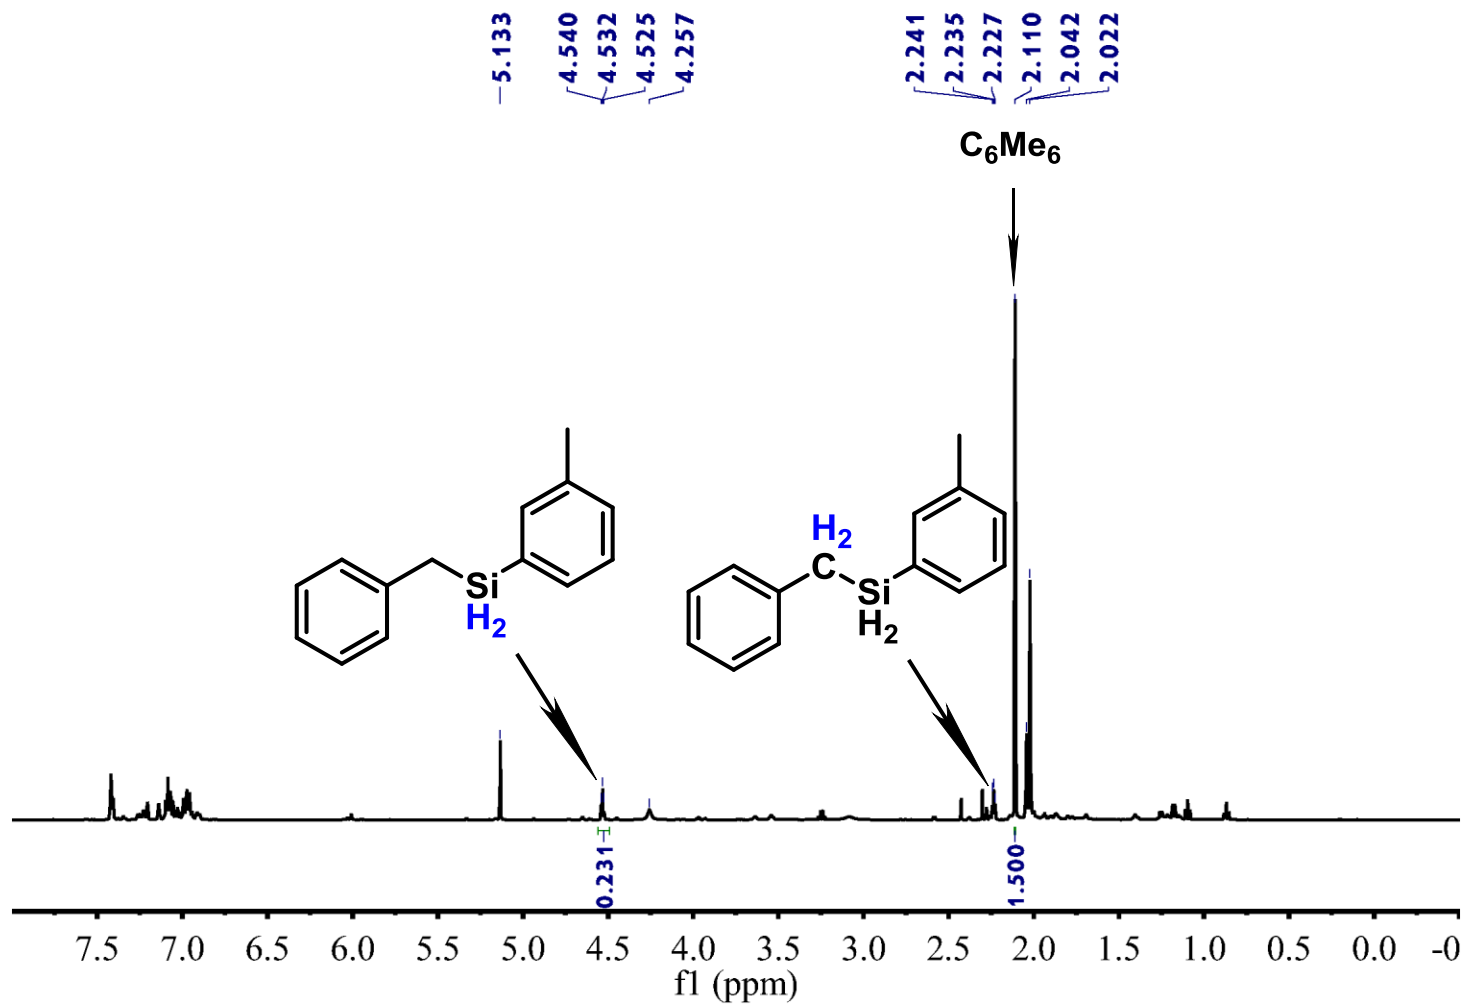

**Figure S52.** Quantitative  $^1\text{H}$  NMR spectrum of the products of the cross-desilacoupling of benzylsilane and 3-Me-PhSiH<sub>3</sub> (~3 equiv.) catalyzed by **1** at r.t. in 10 min (Table 3) (500 MHz, C<sub>6</sub>D<sub>6</sub>, 25 °C).

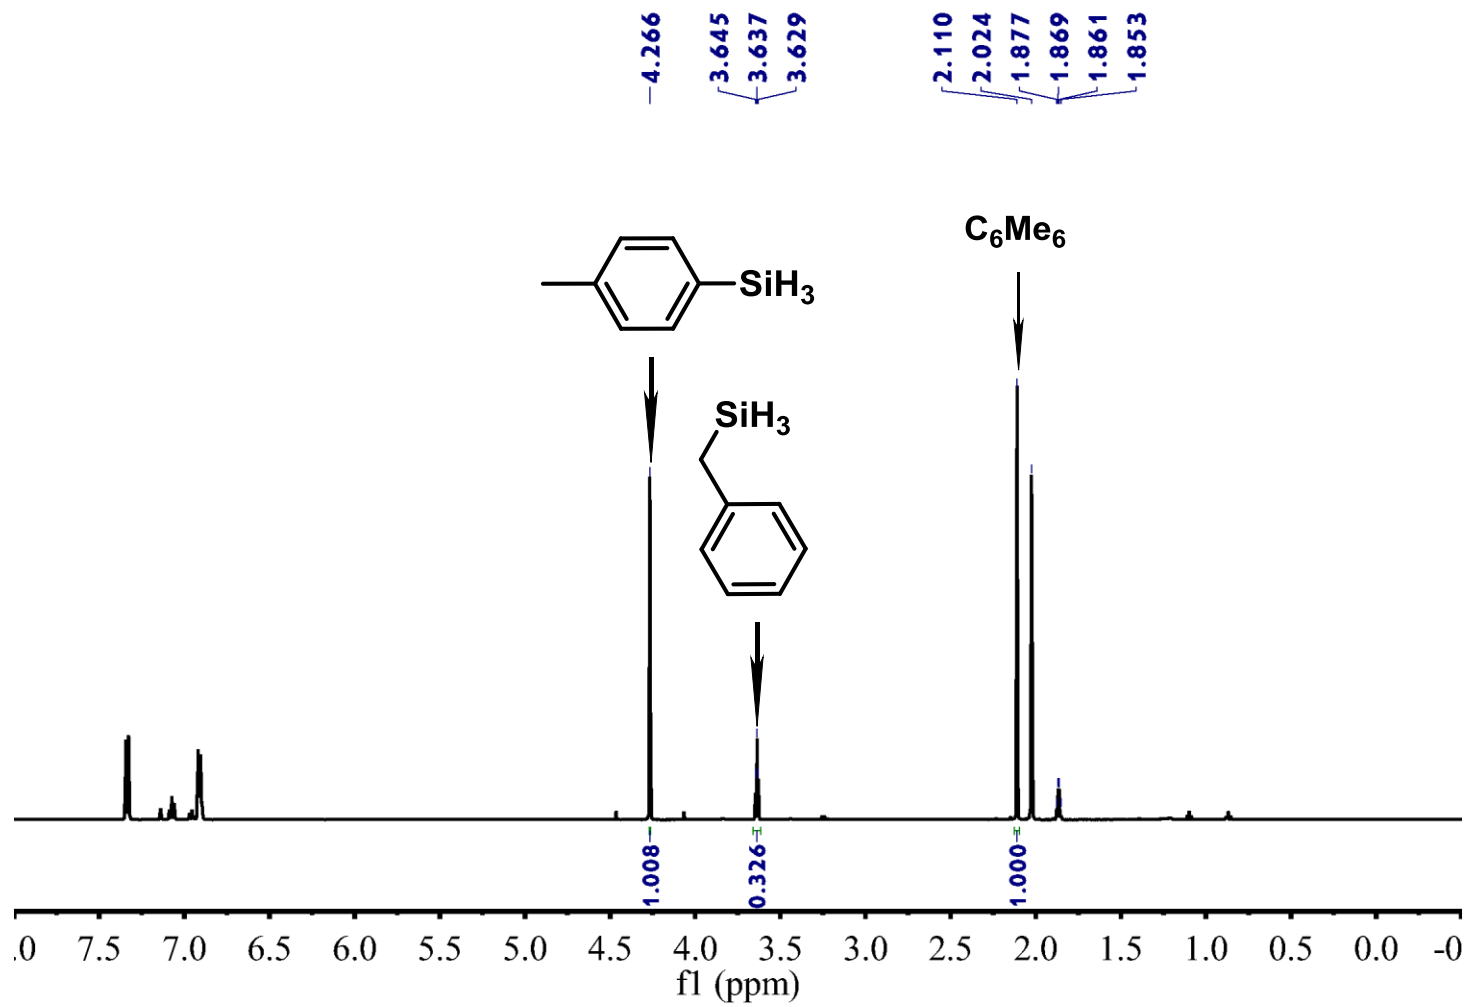

**Figure S53.** Quantitative <sup>1</sup>H NMR spectrum of the C<sub>6</sub>D<sub>6</sub> solution of benzylsilane and 4-Me-PhSiH<sub>3</sub> (~3 equiv.) for the cross-desilacoupling catalyzed by **1** with hexamethylbenzene as the internal standard (500 MHz, C<sub>6</sub>D<sub>6</sub>, 25 °C).

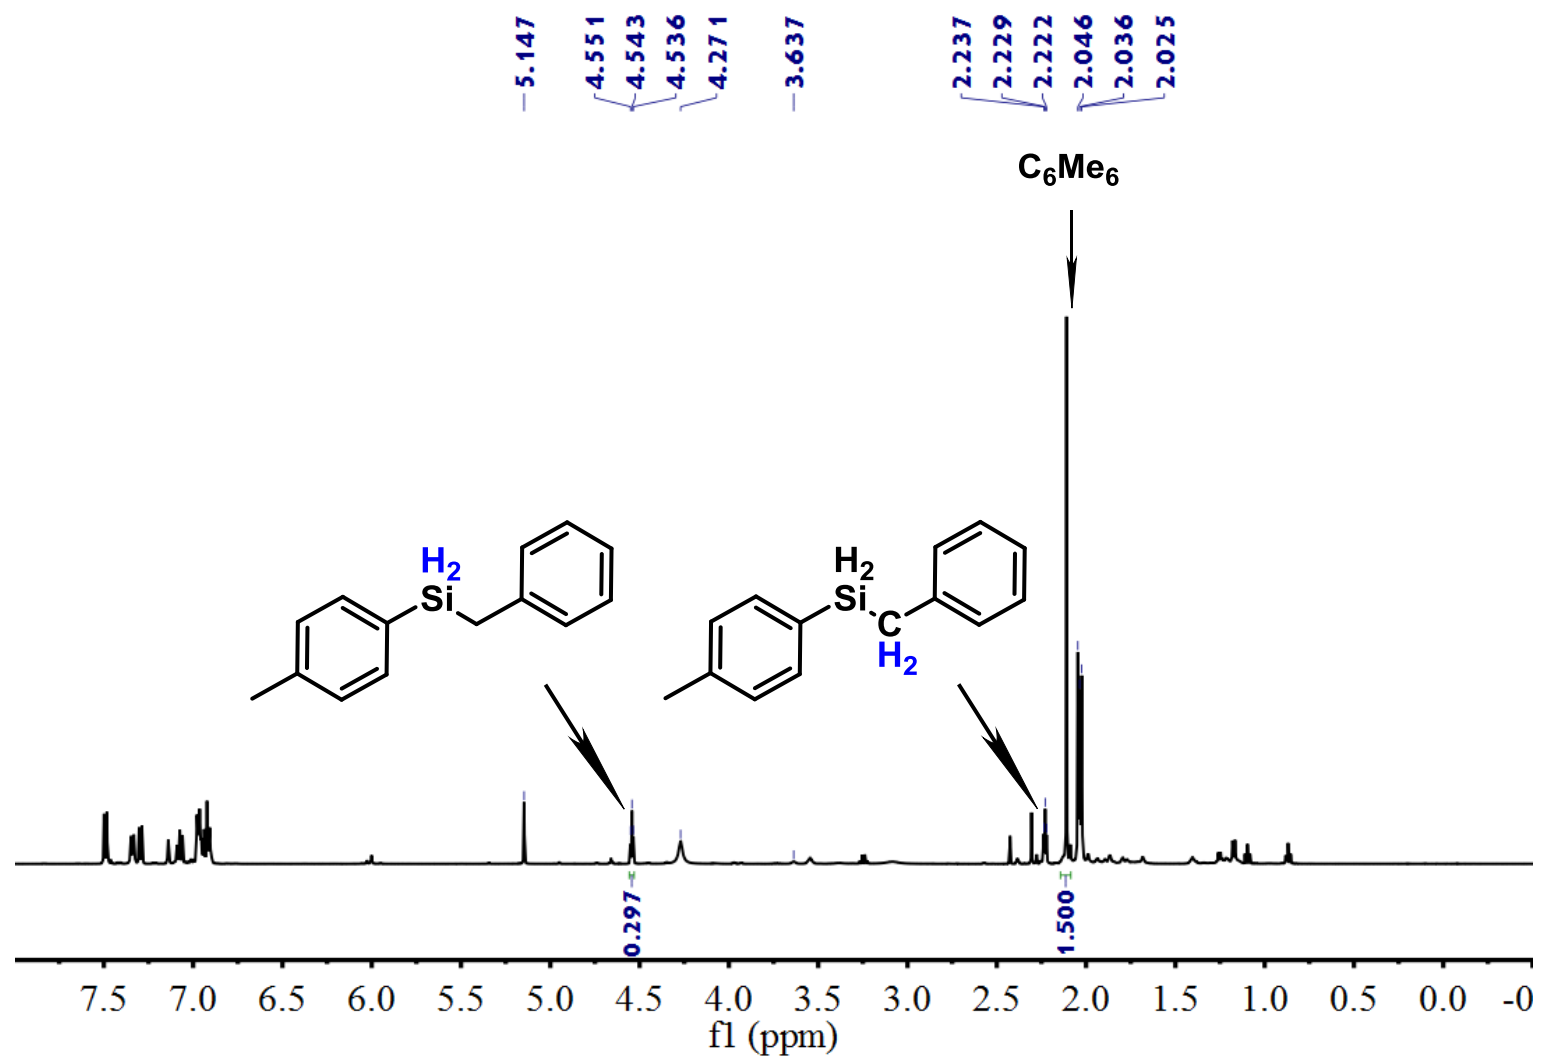

**Figure S54.** Quantitative  $^1\text{H}$  NMR spectrum of the products of the cross-desilacoupling of benzylsilane and 4-Me-PhSiH<sub>3</sub> (~3 equiv.) catalyzed by **1** at r.t. in 10 min (Table 3) (500 MHz, C<sub>6</sub>D<sub>6</sub>, 25 °C).



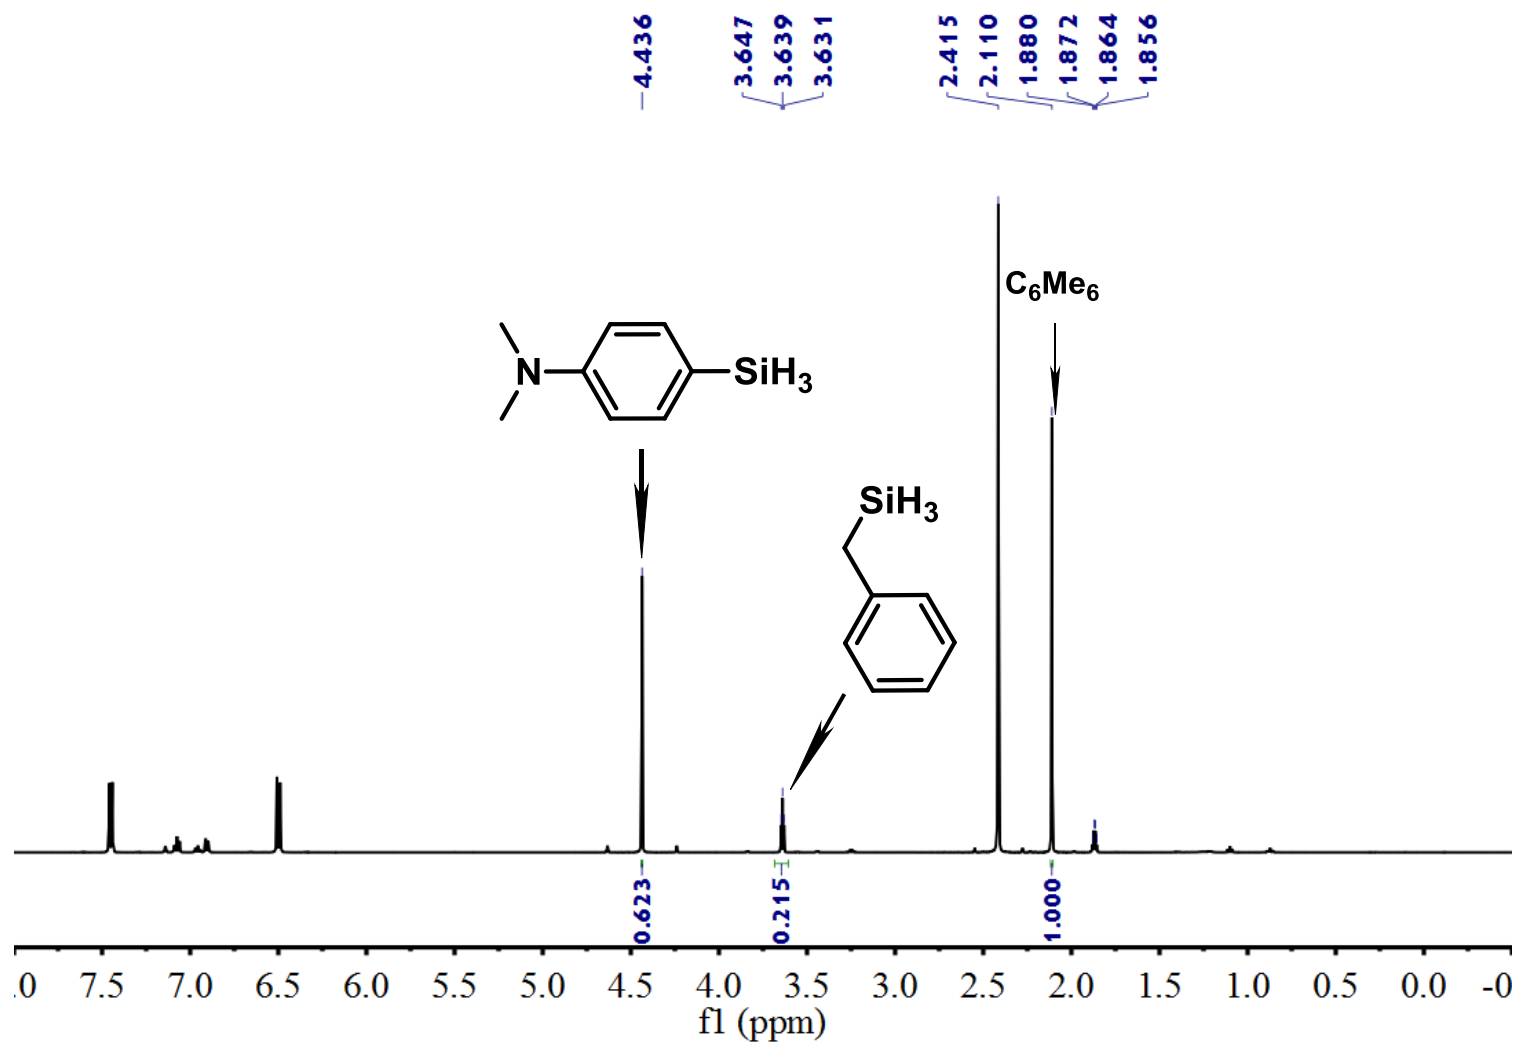

**Figure S55.** Quantitative  $^1\text{H}$  NMR spectrum of the  $\text{C}_6\text{D}_6$  solution of benzylsilane and 4-NMe<sub>2</sub>-PhSiH<sub>3</sub> (~3 equiv.) for the cross-desilacoupling catalyzed by **1** with hexamethylbenzene as the internal standard (500 MHz,  $\text{C}_6\text{D}_6$ , 25 °C).

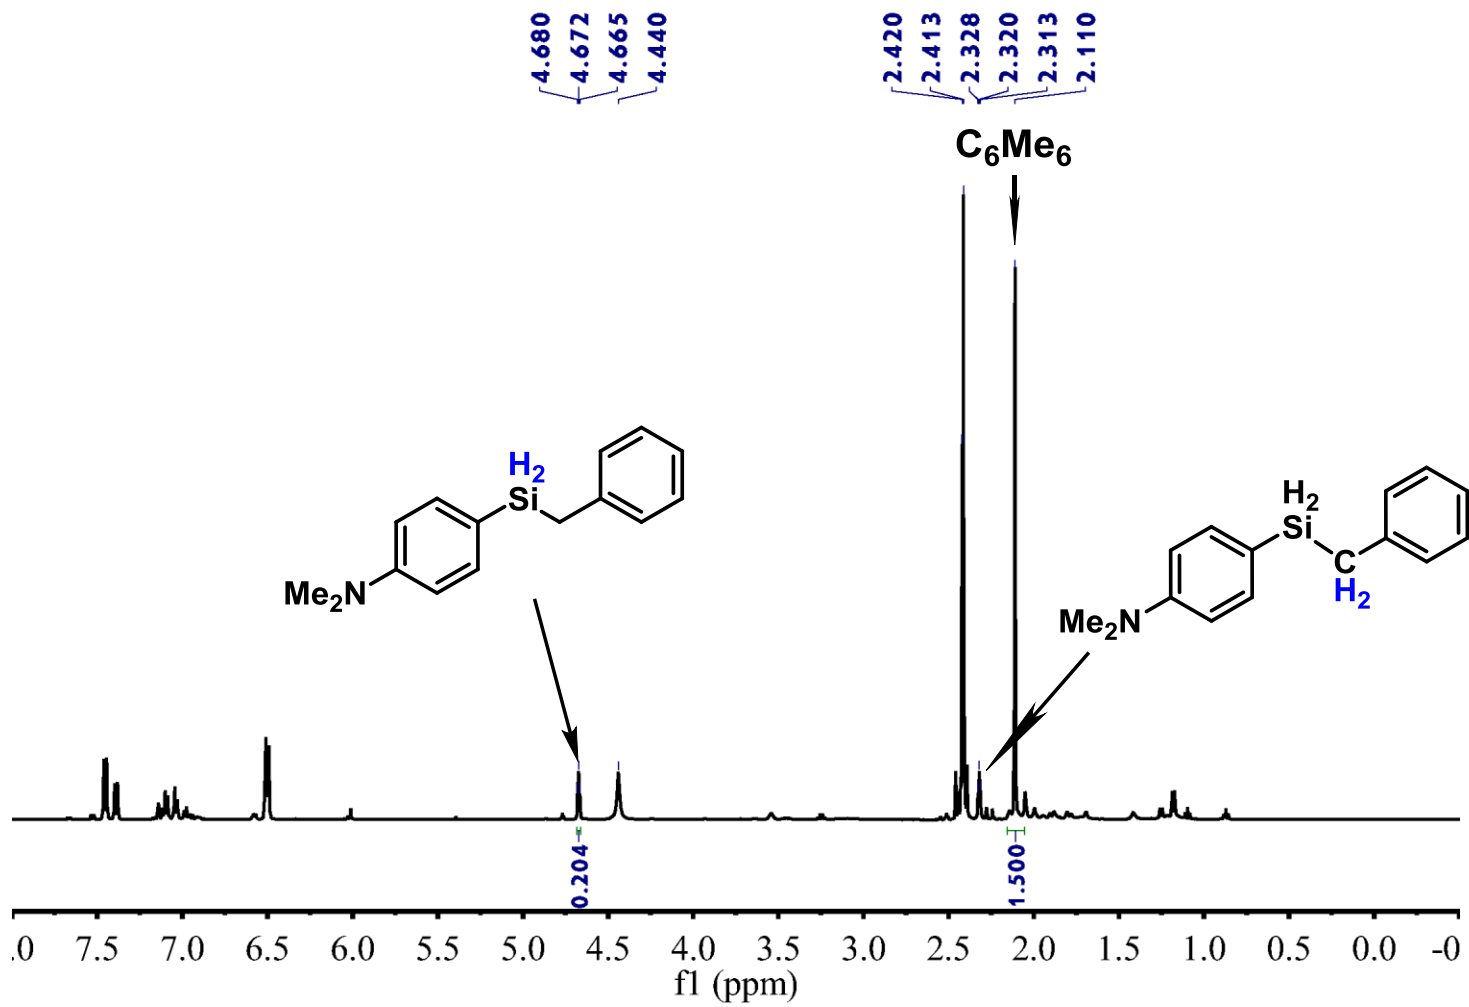

**Figure S56.** Quantitative  $^1\text{H}$  NMR spectrum of the products of the cross-desilacoupling of benzylsilane and 4- $\text{NMe}_2$ - $\text{PhSiH}_3$  (~3 equiv.) catalyzed by **1** at r.t. in 10 min (Table 3) (500 MHz,  $\text{C}_6\text{D}_6$ , 25  $^\circ\text{C}$ ).

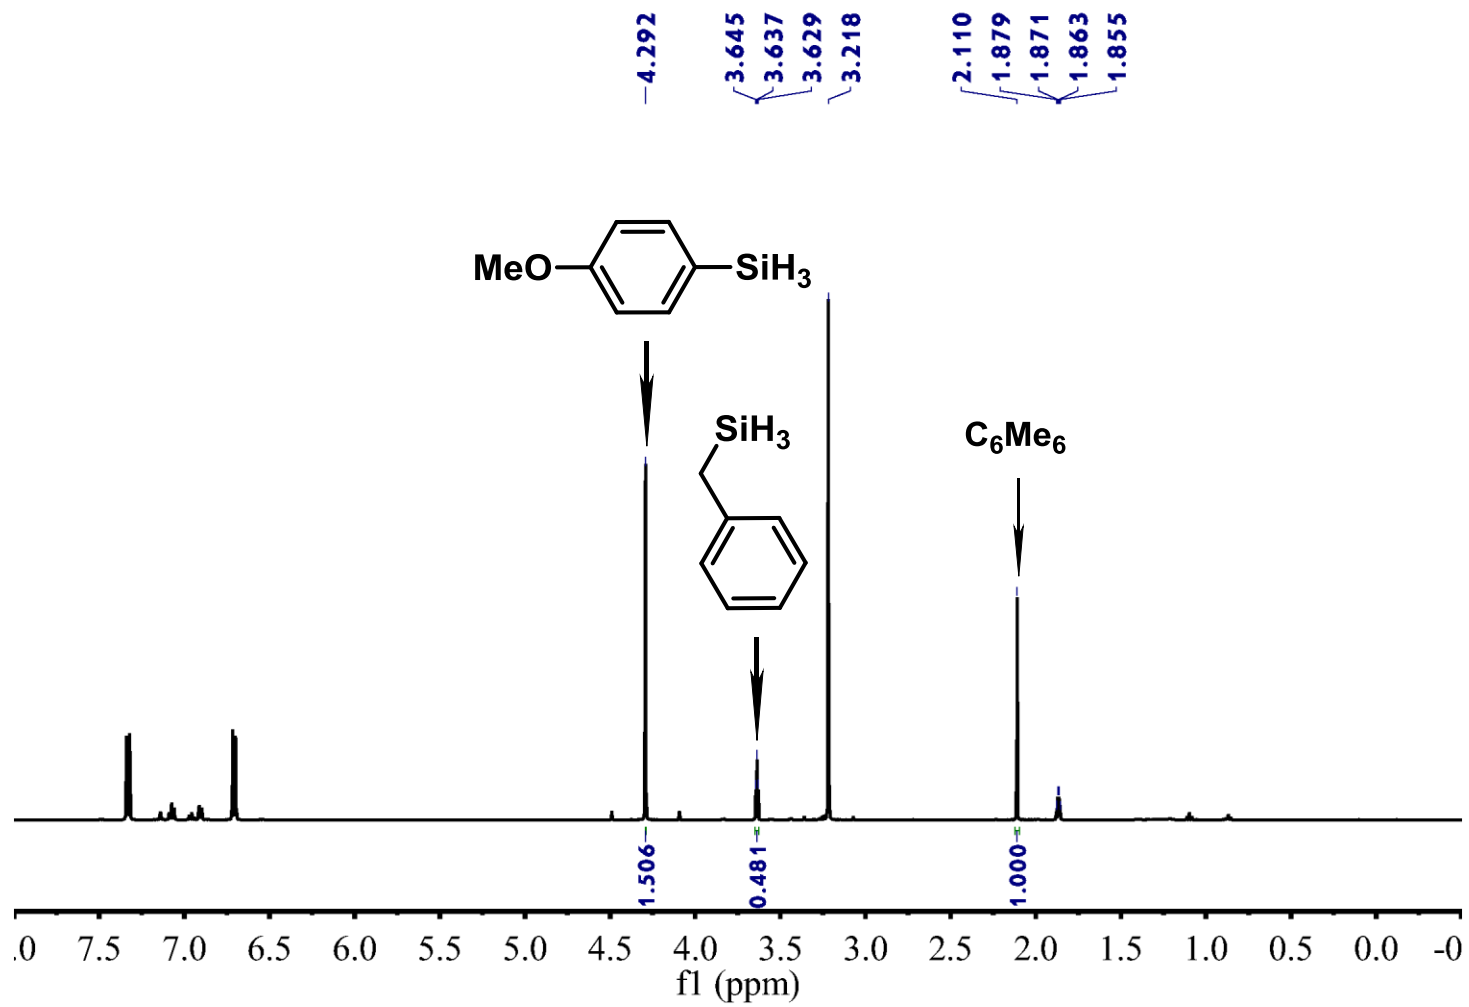

**Figure S57.** Quantitative <sup>1</sup>H NMR spectrum of the C<sub>6</sub>D<sub>6</sub> solution of benzylsilane and 4-MeO-PhSiH<sub>3</sub> (~3 equiv.) for the cross-desilacoupling catalyzed by **1** with hexamethylbenzene as the internal standard (500 MHz, C<sub>6</sub>D<sub>6</sub>, 25 °C).

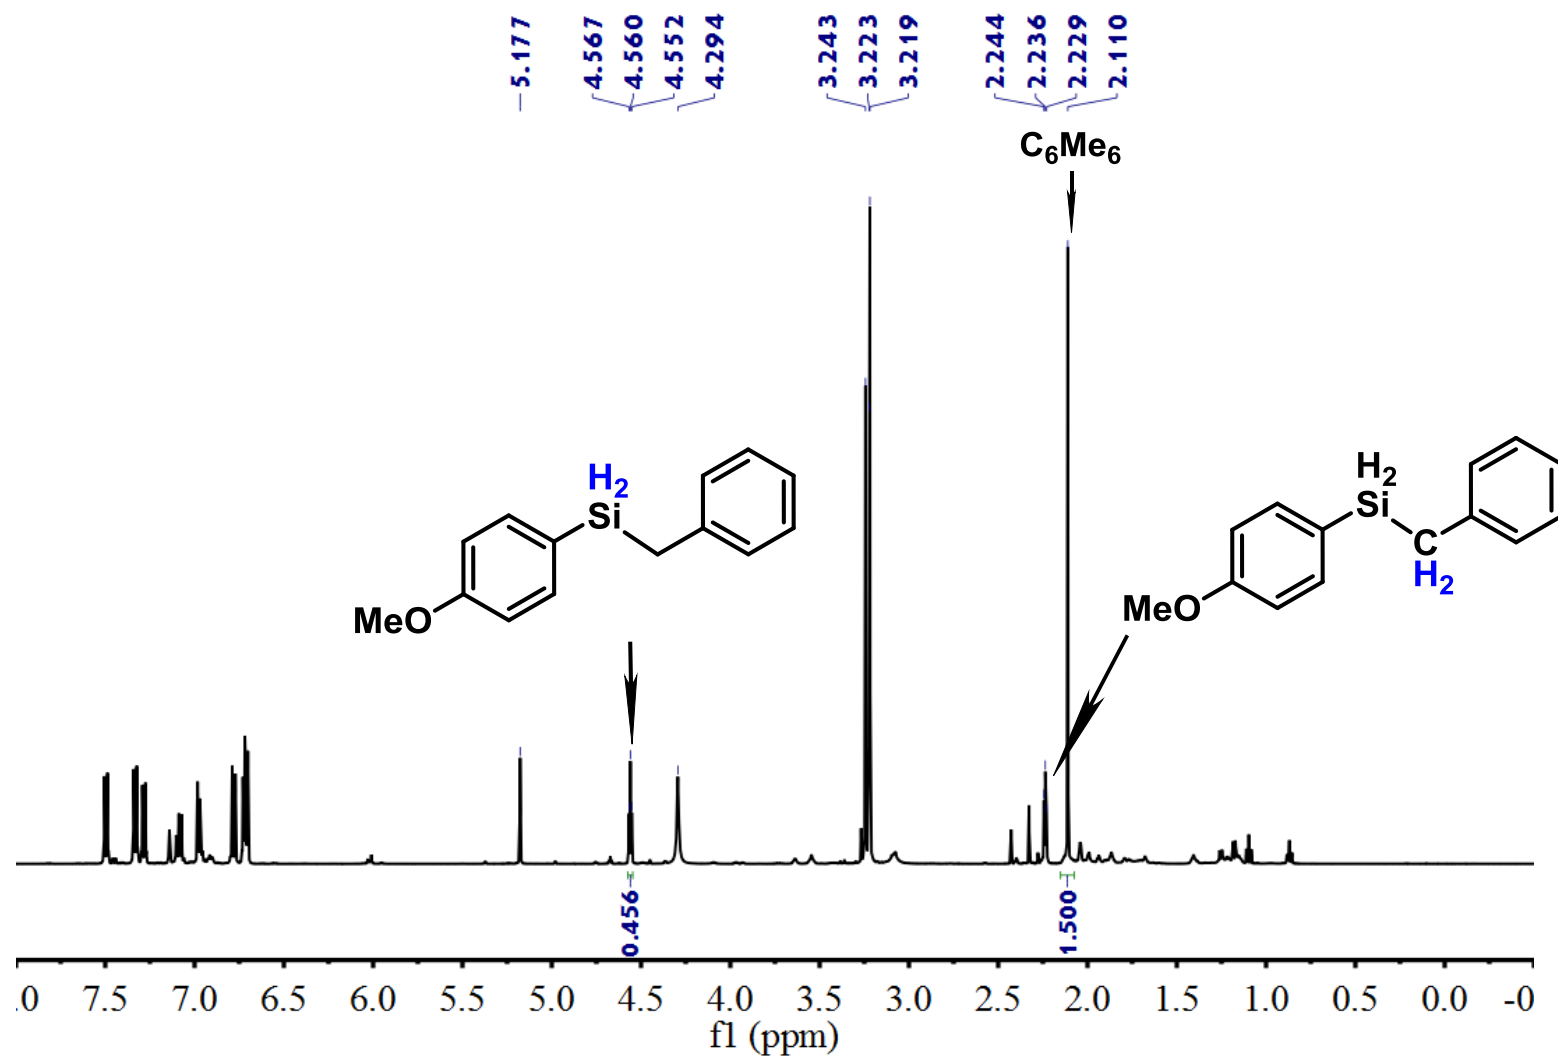

**Figure S58.** Quantitative <sup>1</sup>H NMR spectrum of the products of the cross-desilacoupling of benzylsilane and 4-MeO-PhSiH<sub>3</sub> (~3 equiv.) catalyzed by **1** at r.t. in 10 min (Table 3) (500 MHz, C<sub>6</sub>D<sub>6</sub>, 25 °C).

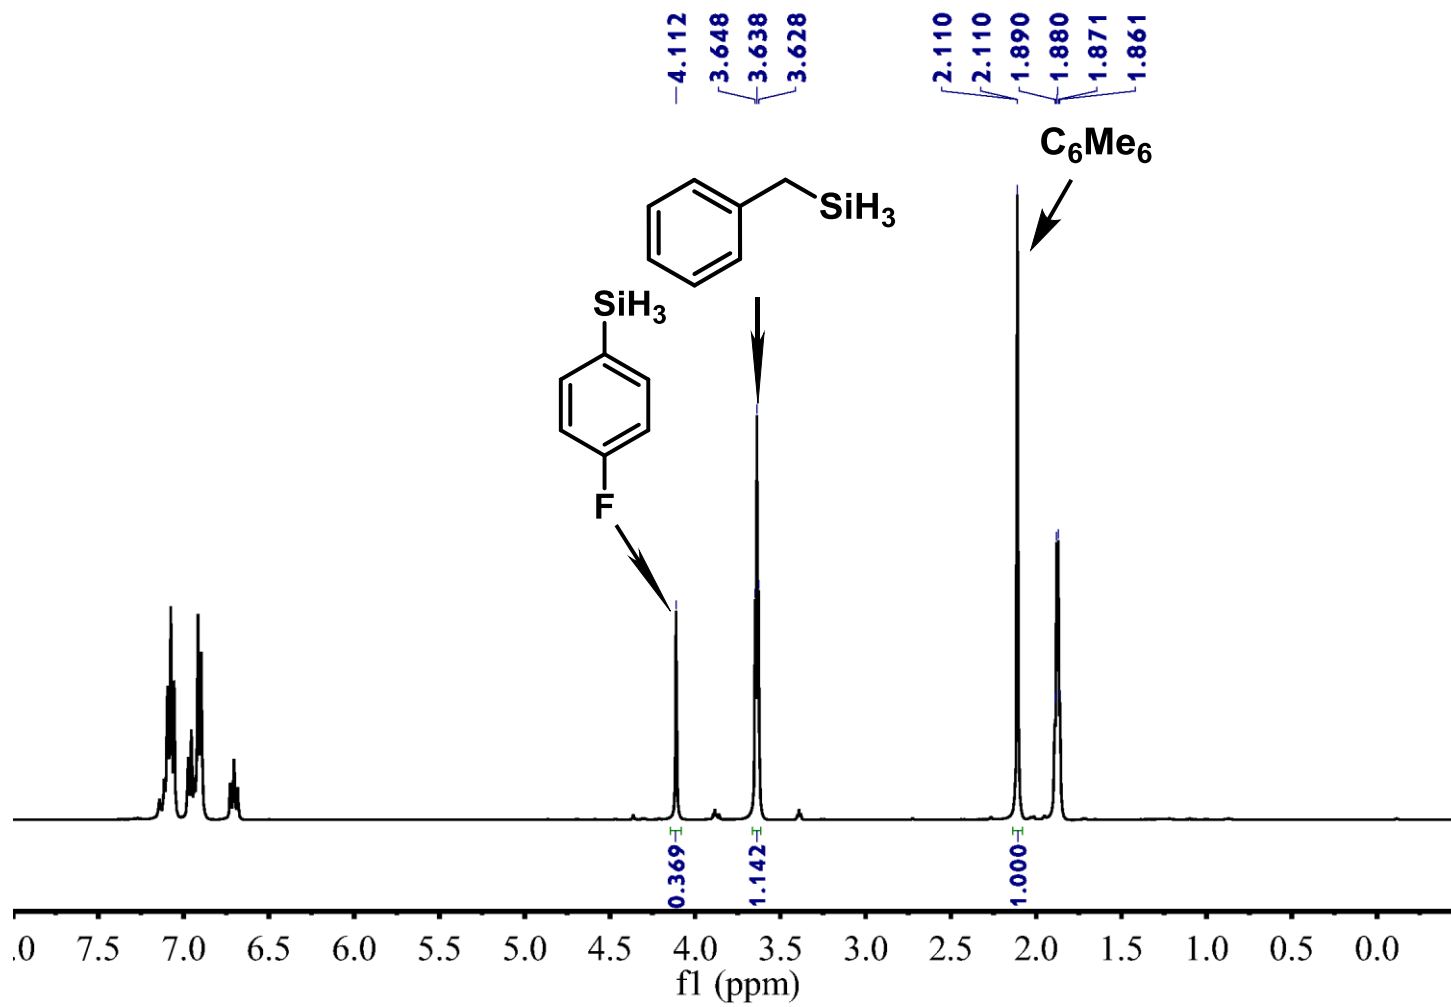

**Figure S59.** Quantitative  $^1\text{H}$  NMR spectrum of the  $\text{C}_6\text{D}_6$  solution of 4-F-PhSiH<sub>3</sub> and benzylsilane (~3 equiv.) for the cross-desilacoupling catalyzed by **1** with hexamethylbenzene as the internal standard (600 MHz,  $\text{C}_6\text{D}_6$ , 25 °C).

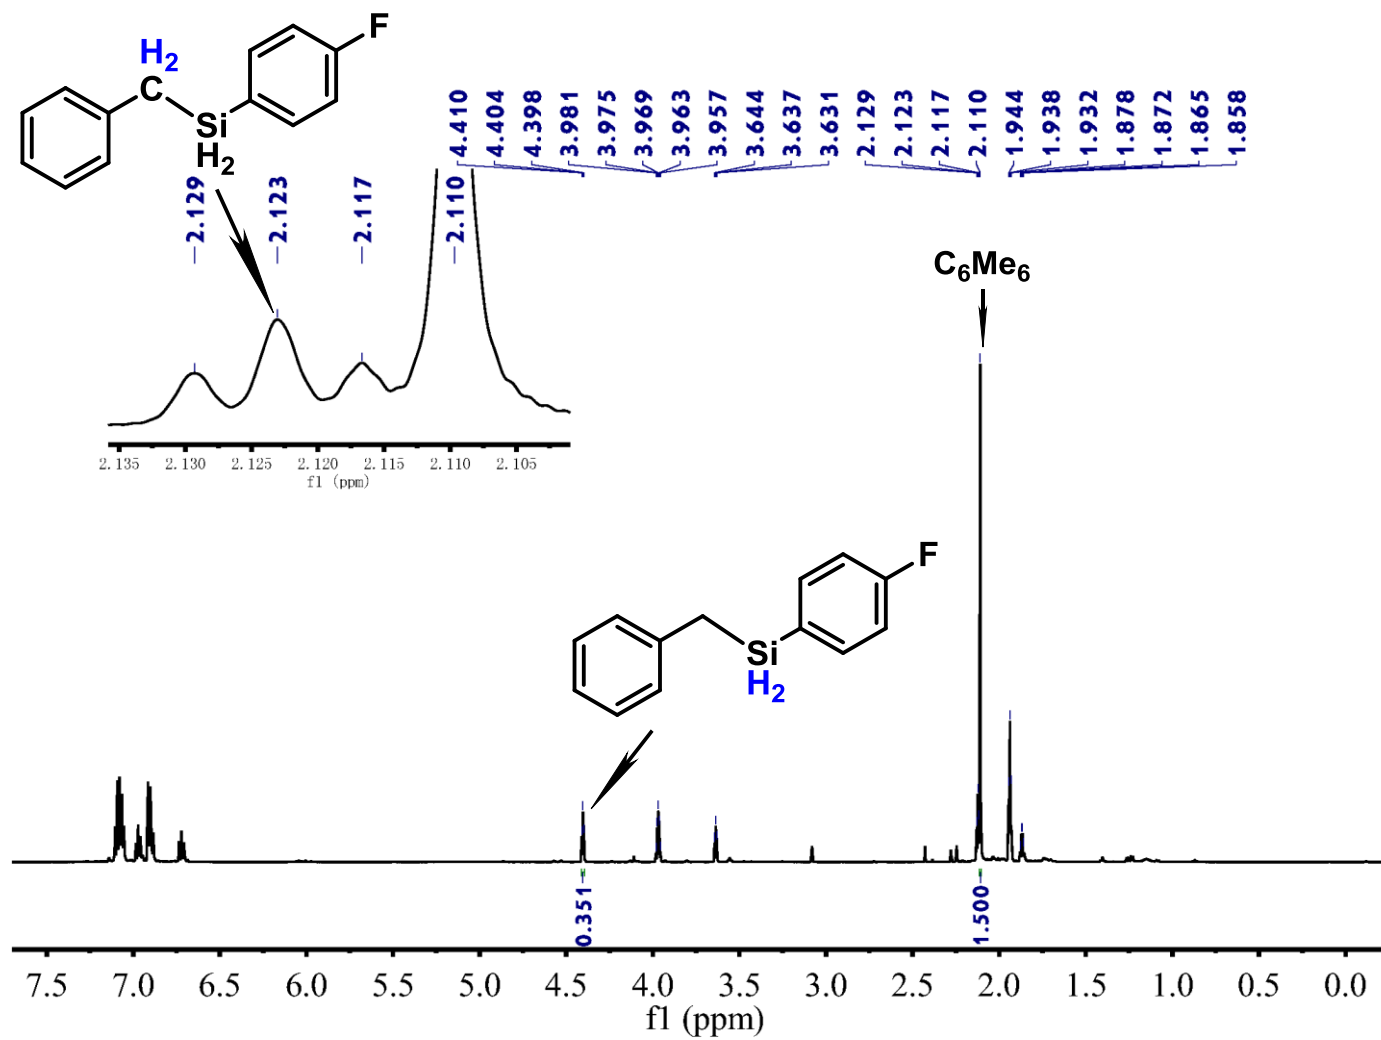

**Figure S60.** Quantitative  $^1\text{H}$  NMR spectrum of the products of the cross-desilacoupling of 4-F-PhSiH<sub>3</sub> and benzylsilane (~3 equiv.) catalyzed by **1** at r.t. in 10 min (Table 3) (600 MHz, C<sub>6</sub>D<sub>6</sub>, 25 °C).

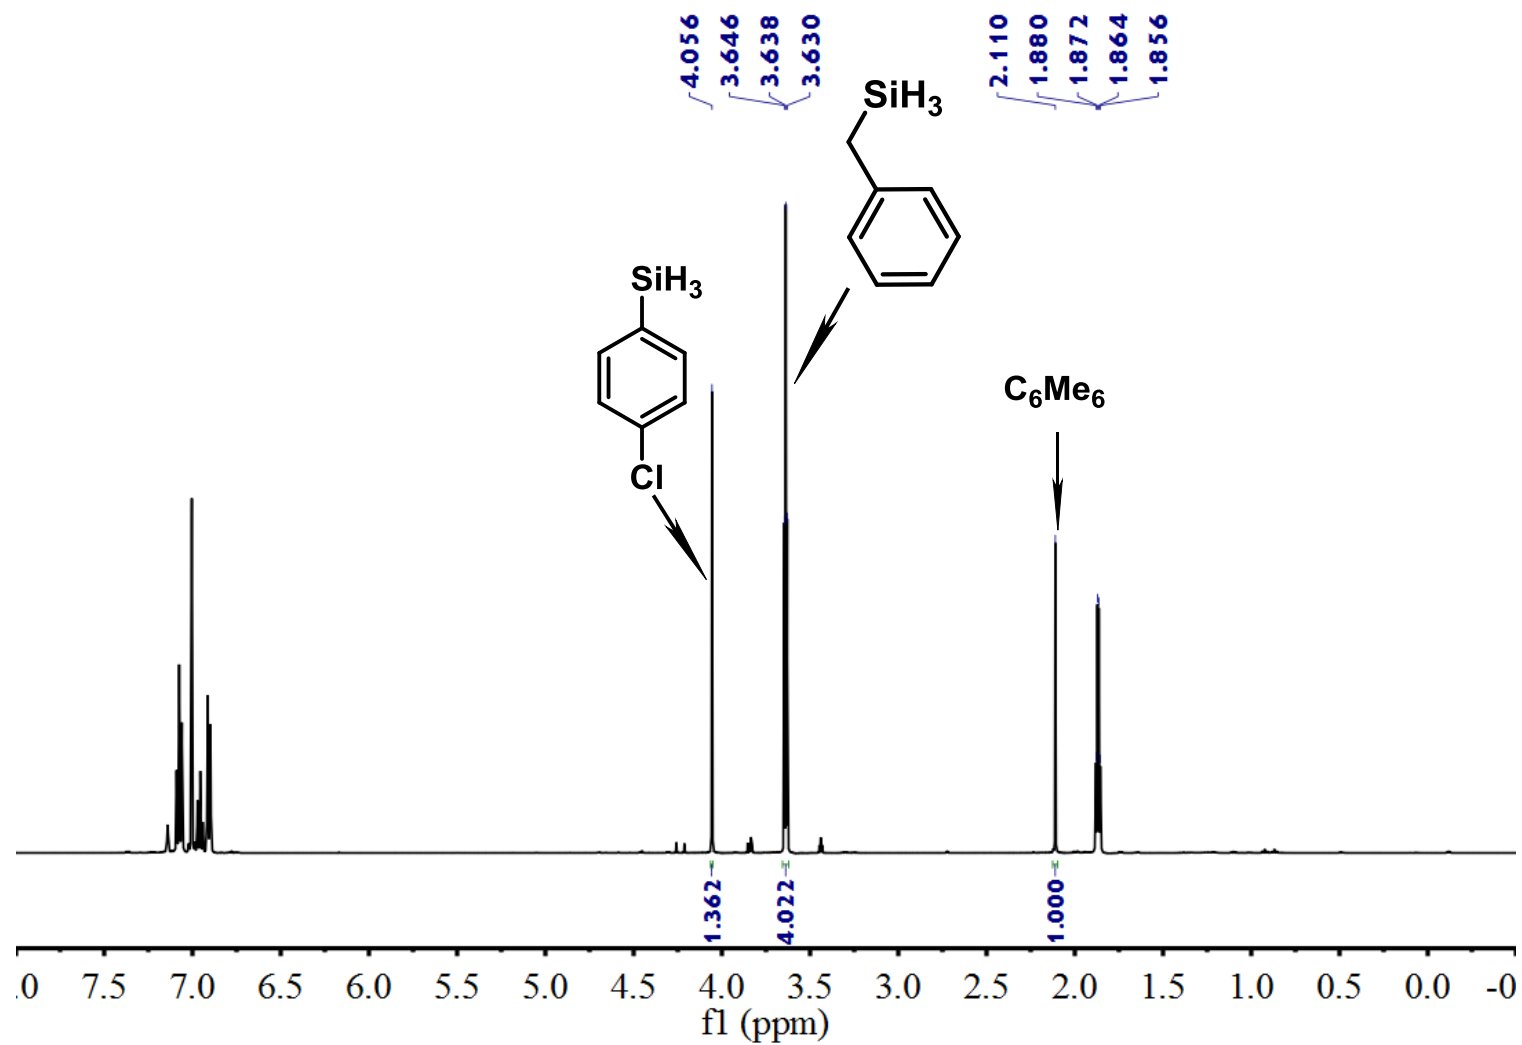

**Figure S61.** Quantitative  $^1\text{H}$  NMR spectrum of the  $\text{C}_6\text{D}_6$  solution of 4-Cl-PhSiH<sub>3</sub> and benzylsilane (~3 equiv.) for the cross-desilacoupling catalyzed by **1** with hexamethylbenzene as the internal standard (600 MHz,  $\text{C}_6\text{D}_6$ , 25 °C).

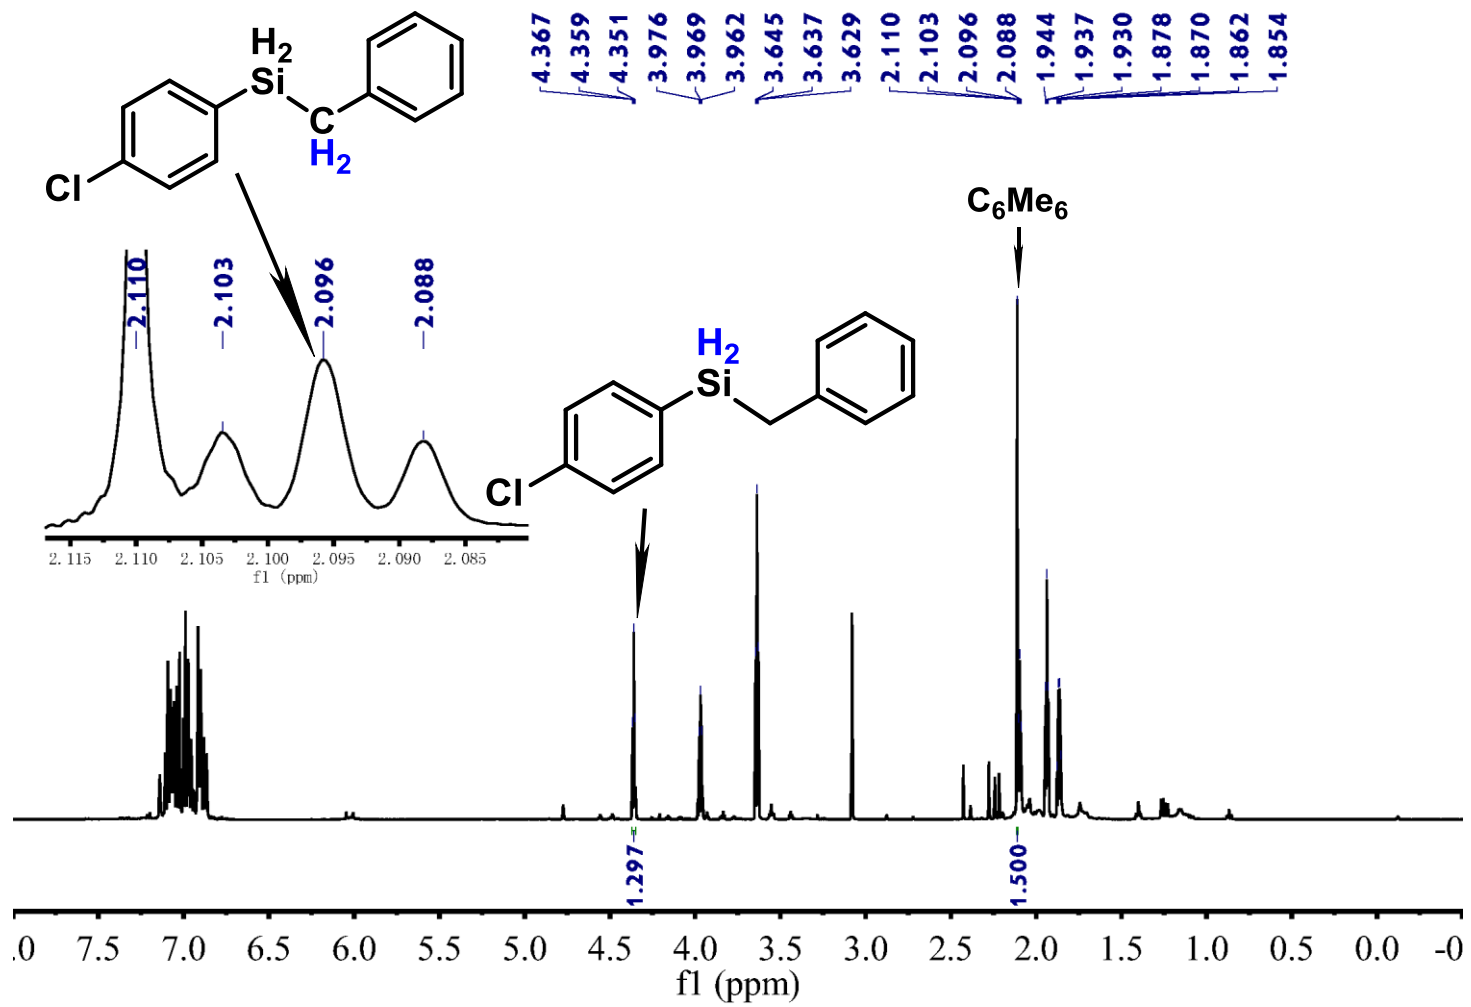

**Figure S62.** Quantitative  $^1\text{H}$  NMR spectrum of the products of the cross-desilacoupling of 4-Cl-PhSiH<sub>3</sub> and benzylsilane (~3 equiv.) catalyzed by **1** at r.t. in 10 min (Table 3) (600 MHz, C<sub>6</sub>D<sub>6</sub>, 25 °C).



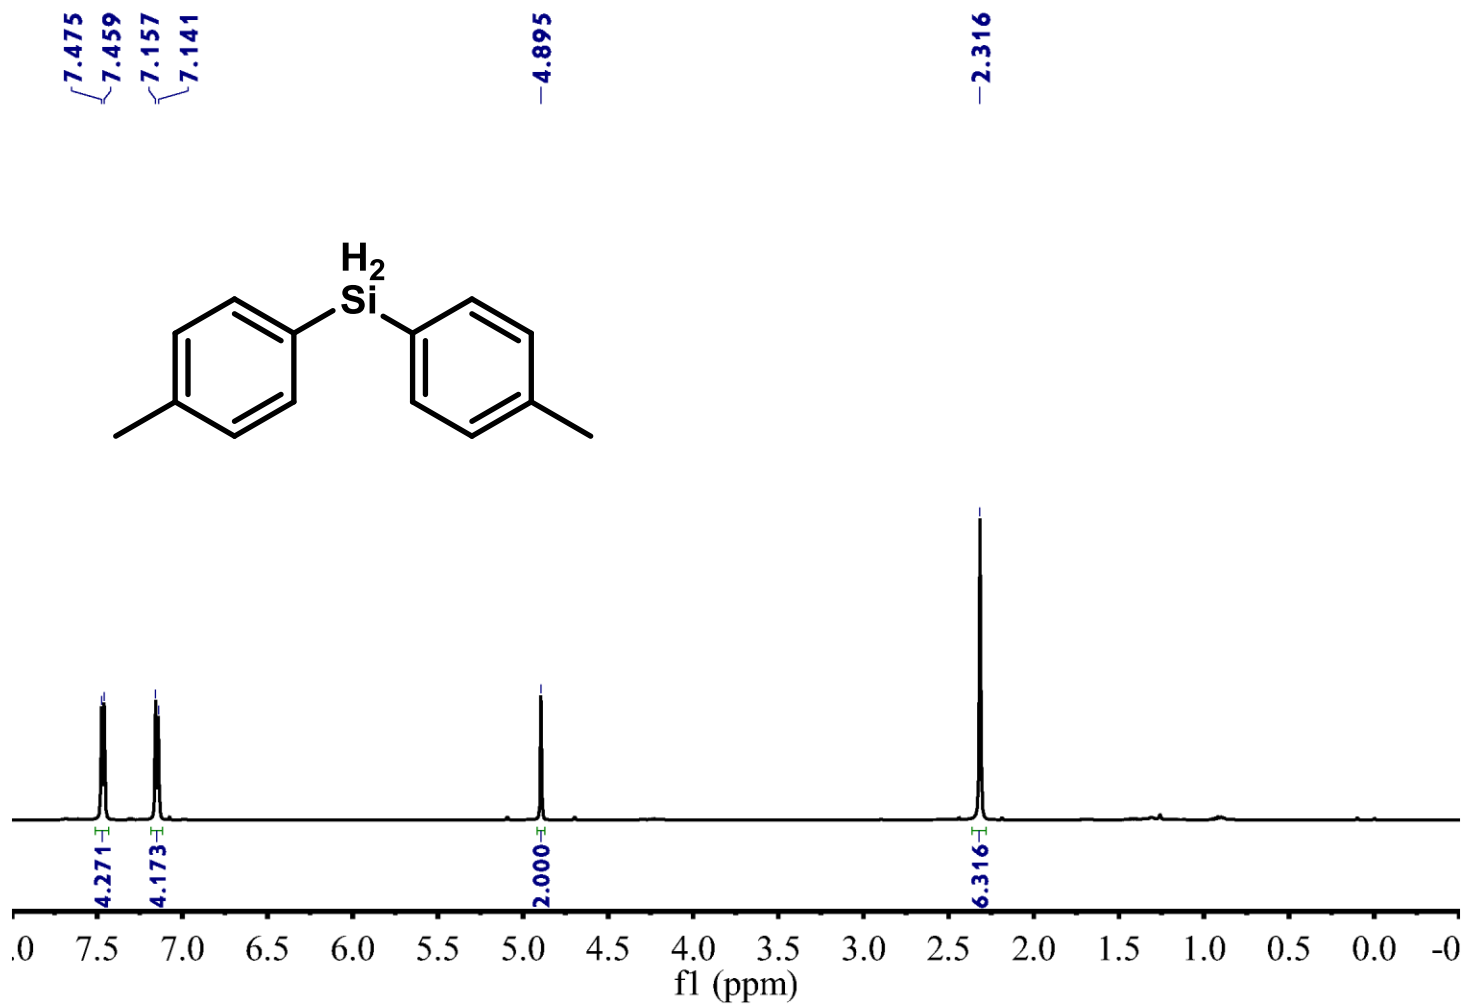

**Figure S63.** <sup>1</sup>H NMR spectrum of dihydrodi(*p*-tolyl)silane (500 MHz, CDCl<sub>3</sub>, 25 °C).

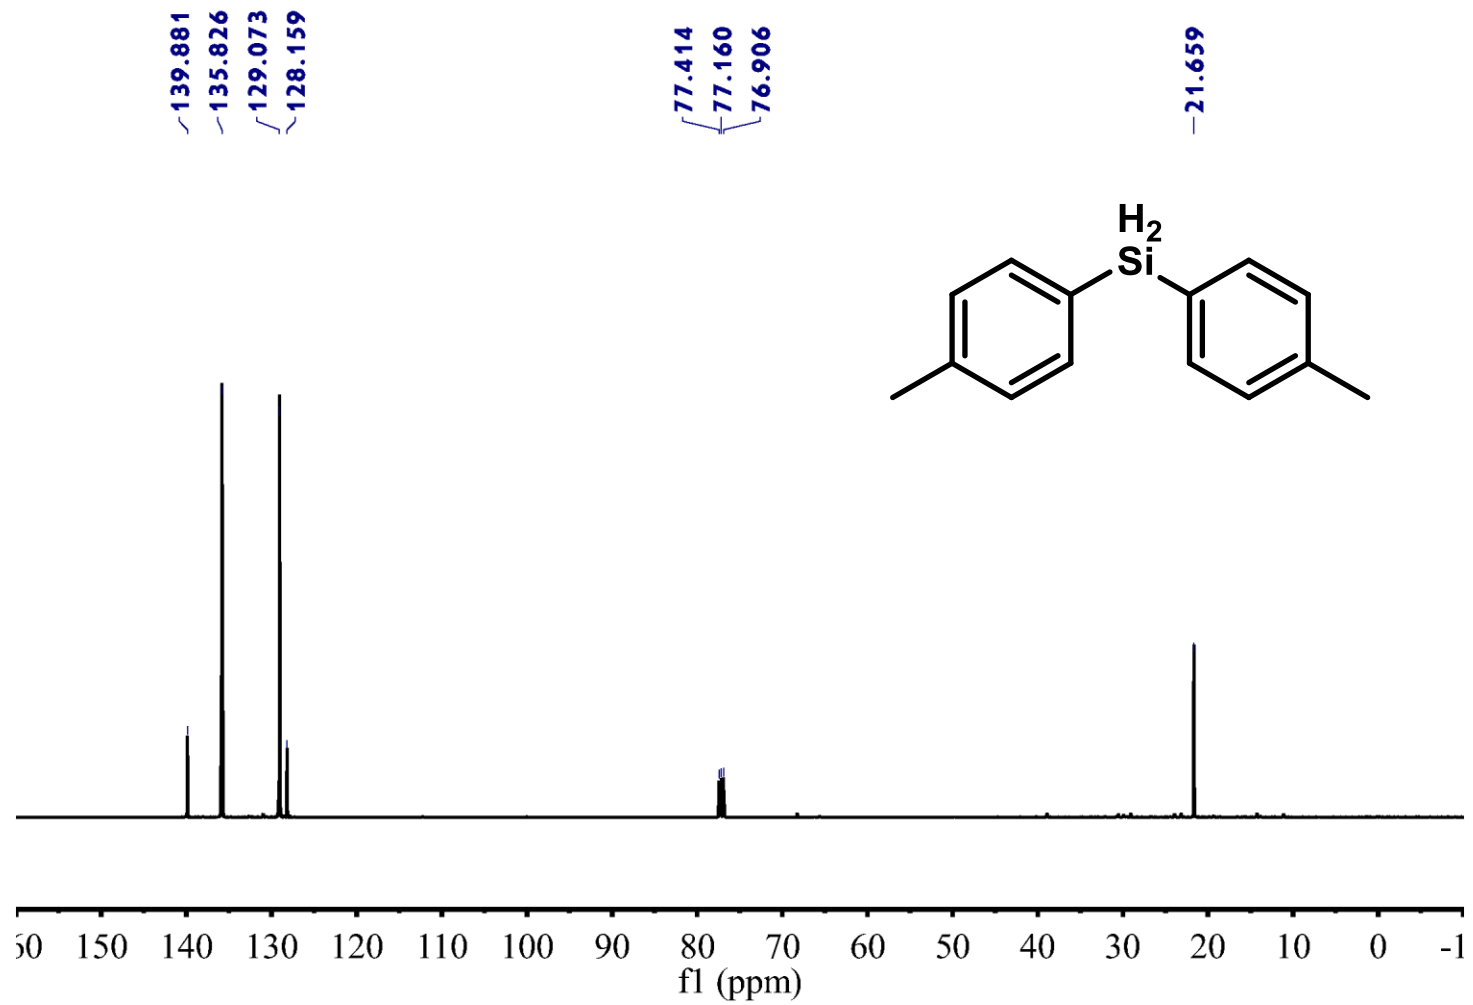

**Figure S64.**  $^{13}\text{C}\{^1\text{H}\}$  NMR spectrum of dihydrodi(*p*-tolyl)silane (125 MHz,  $\text{CDCl}_3$ , 25 °C).

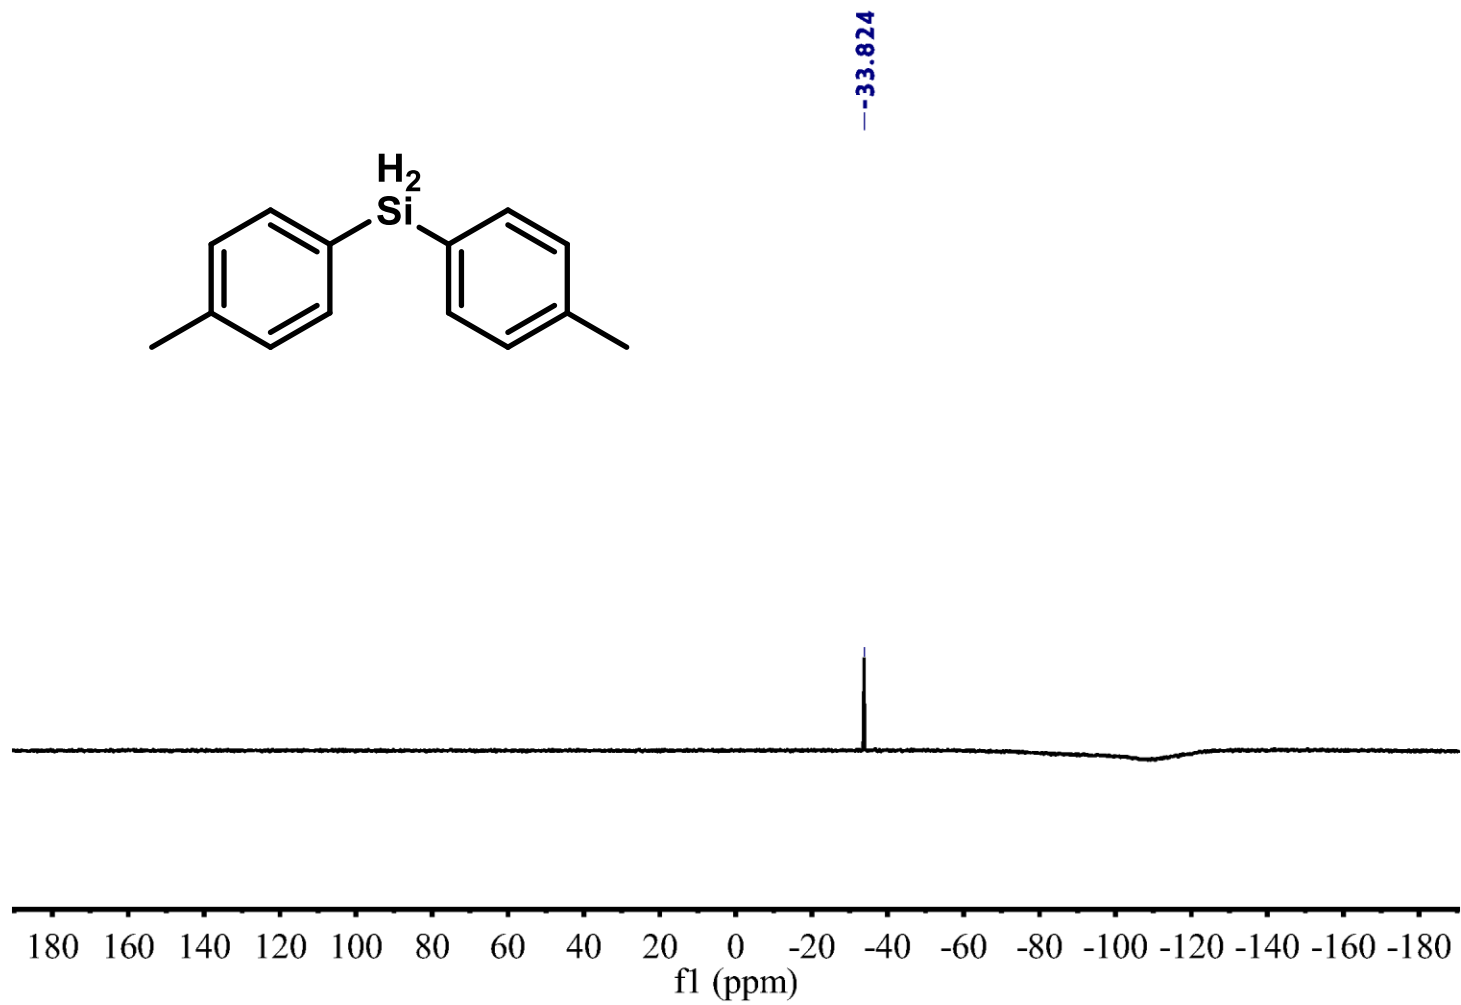

**Figure S65.**  $^{29}\text{Si}$  NMR spectrum of dihydrodi(*p*-tolyl)silane (119.19 MHz,  $\text{CDCl}_3$ , 25 °C).

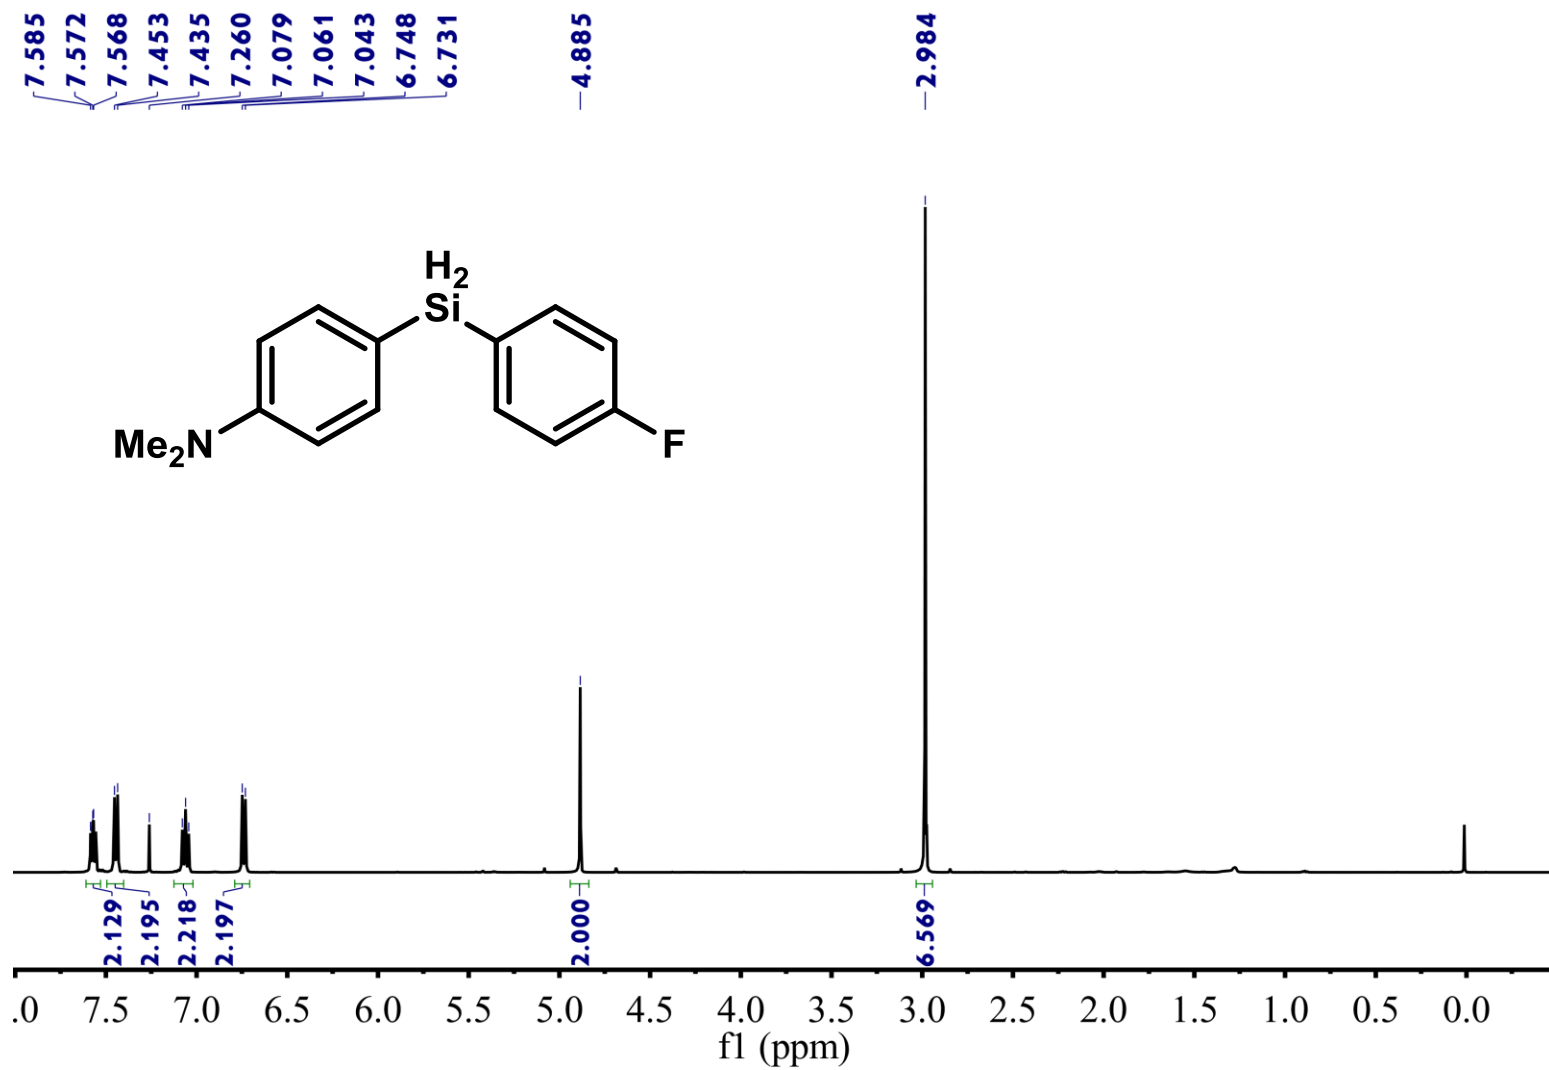

Figure S66. <sup>1</sup>H NMR spectrum of 4-(4-fluorophenylsilyl)-N,N-dimethylaniline (500 MHz, CDCl<sub>3</sub>, 25 °C)

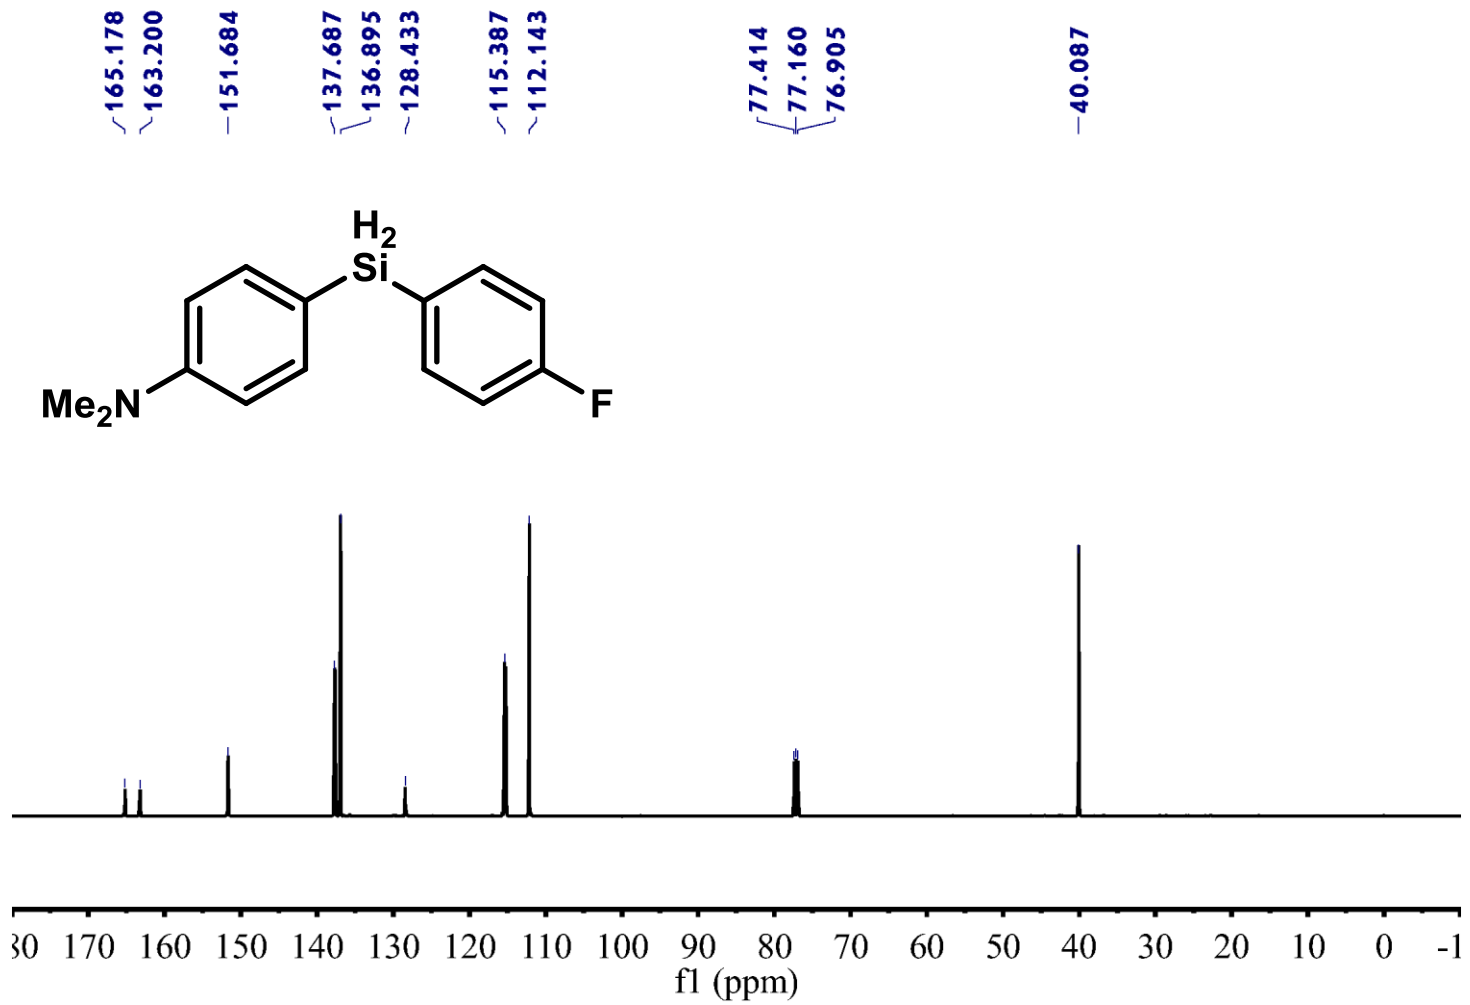

**Figure S67.**  $^{13}\text{C}\{^1\text{H}\}$  NMR spectrum of 4-(4-fluorophenylsilanyl)-N,N-dimethylaniline (125 MHz,  $\text{CDCl}_3$ , 25 °C).

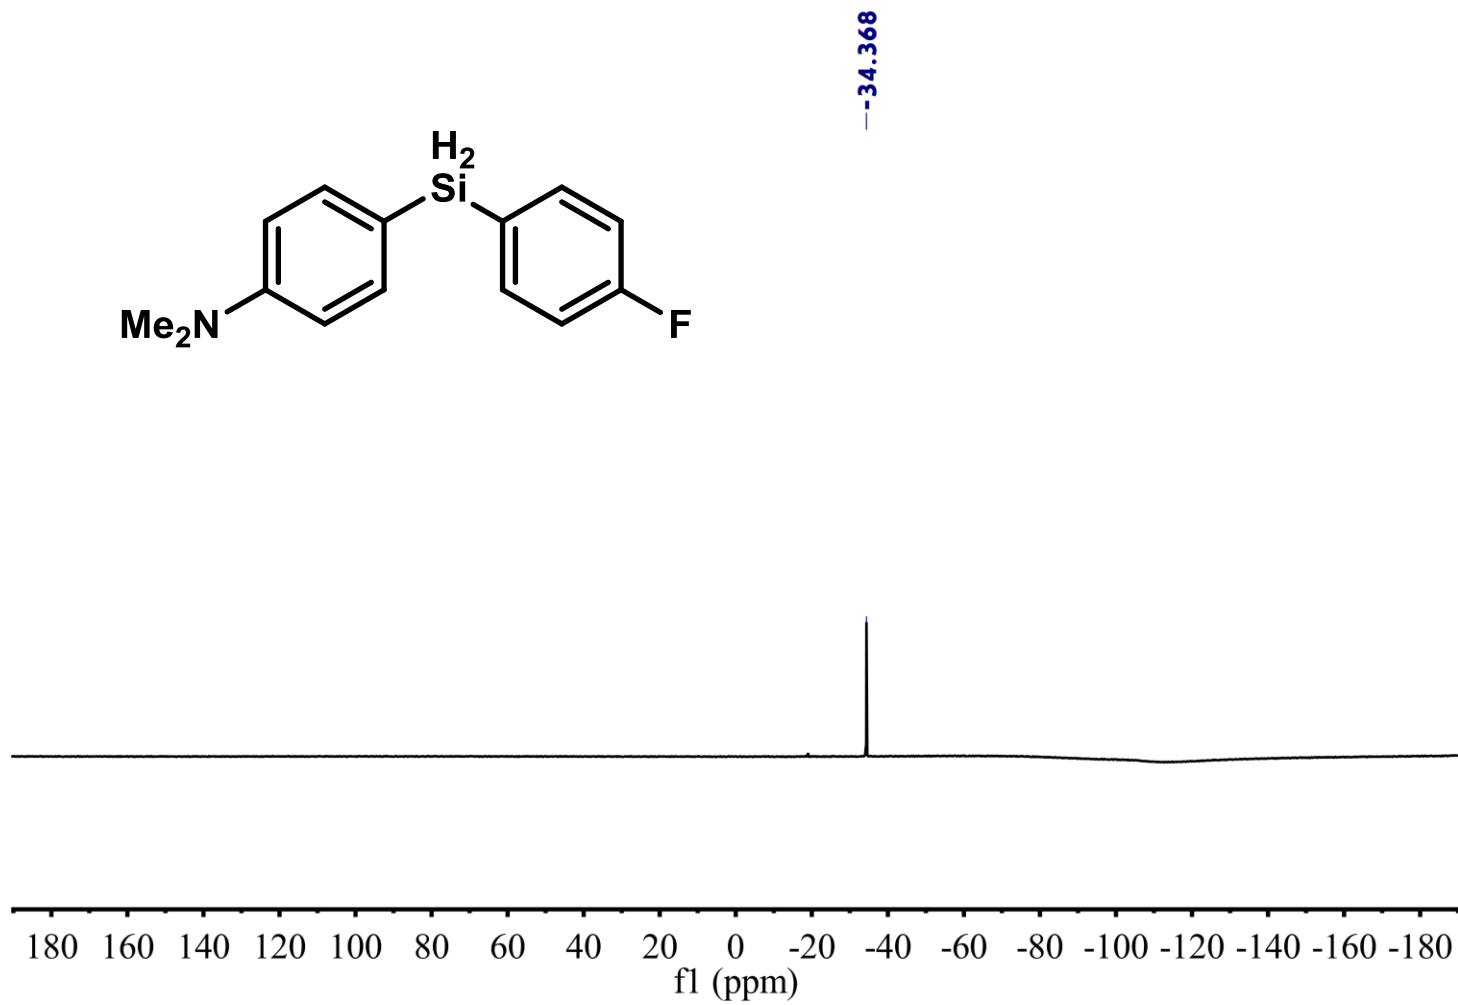

**Figure S68.**  $^{29}\text{Si}$  NMR spectrum of 4-(4-fluorophenylsilanyl)-N,N-dimethylaniline (119.19 MHz,  $\text{CDCl}_3$ , 25 °C).

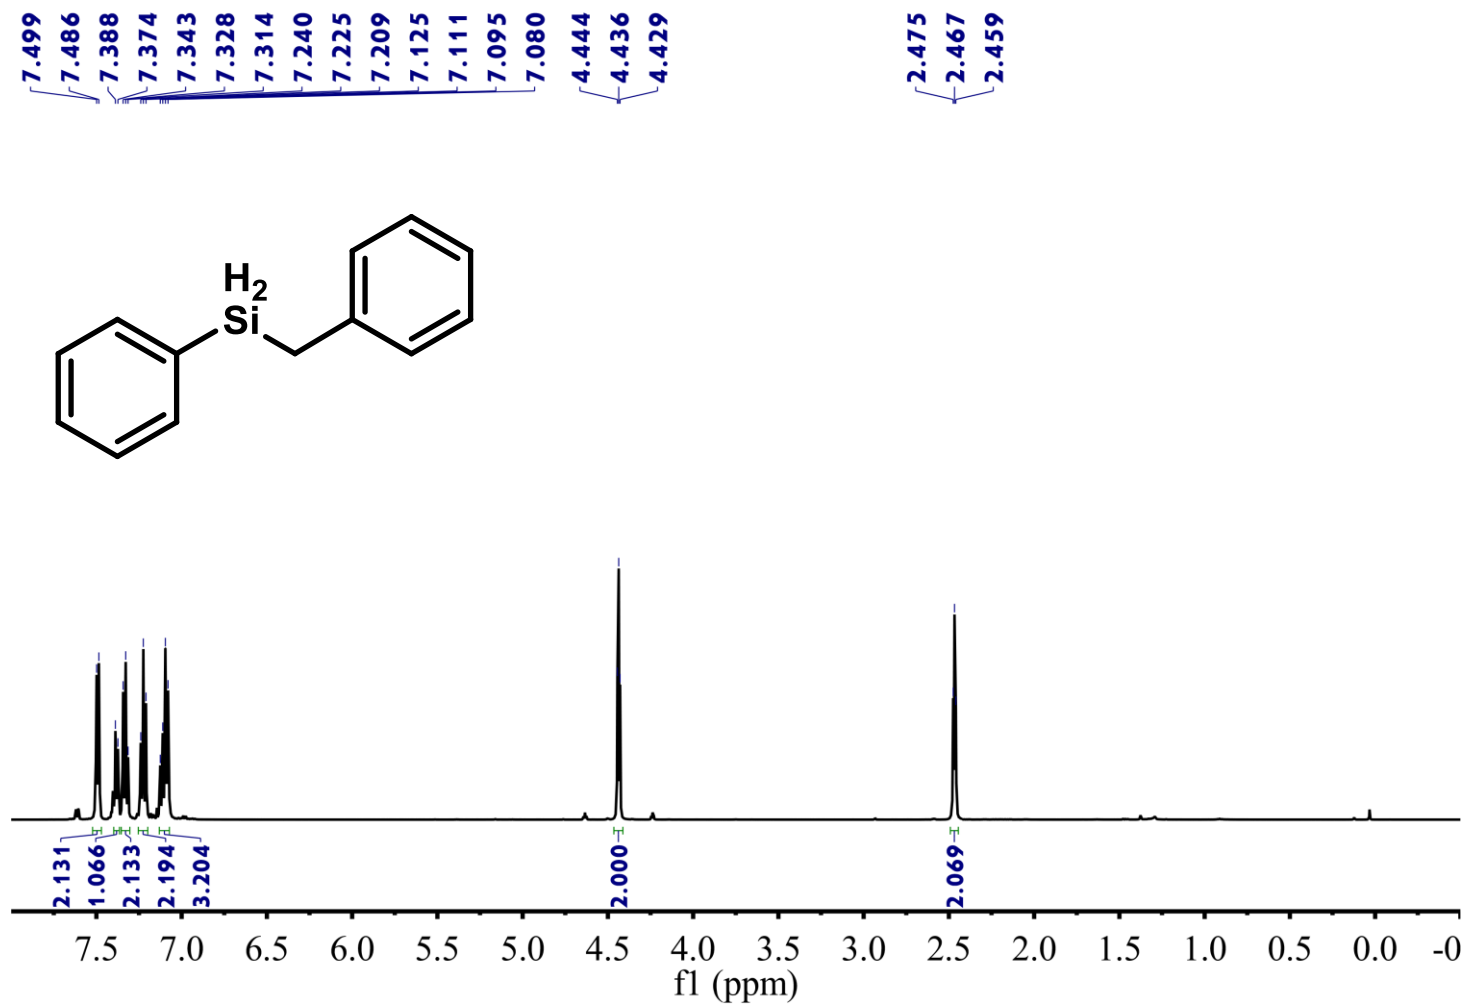

Figure S69. <sup>1</sup>H NMR spectrum of benzyl(phenyl)silane (500 MHz, CDCl<sub>3</sub>, 25 °C).

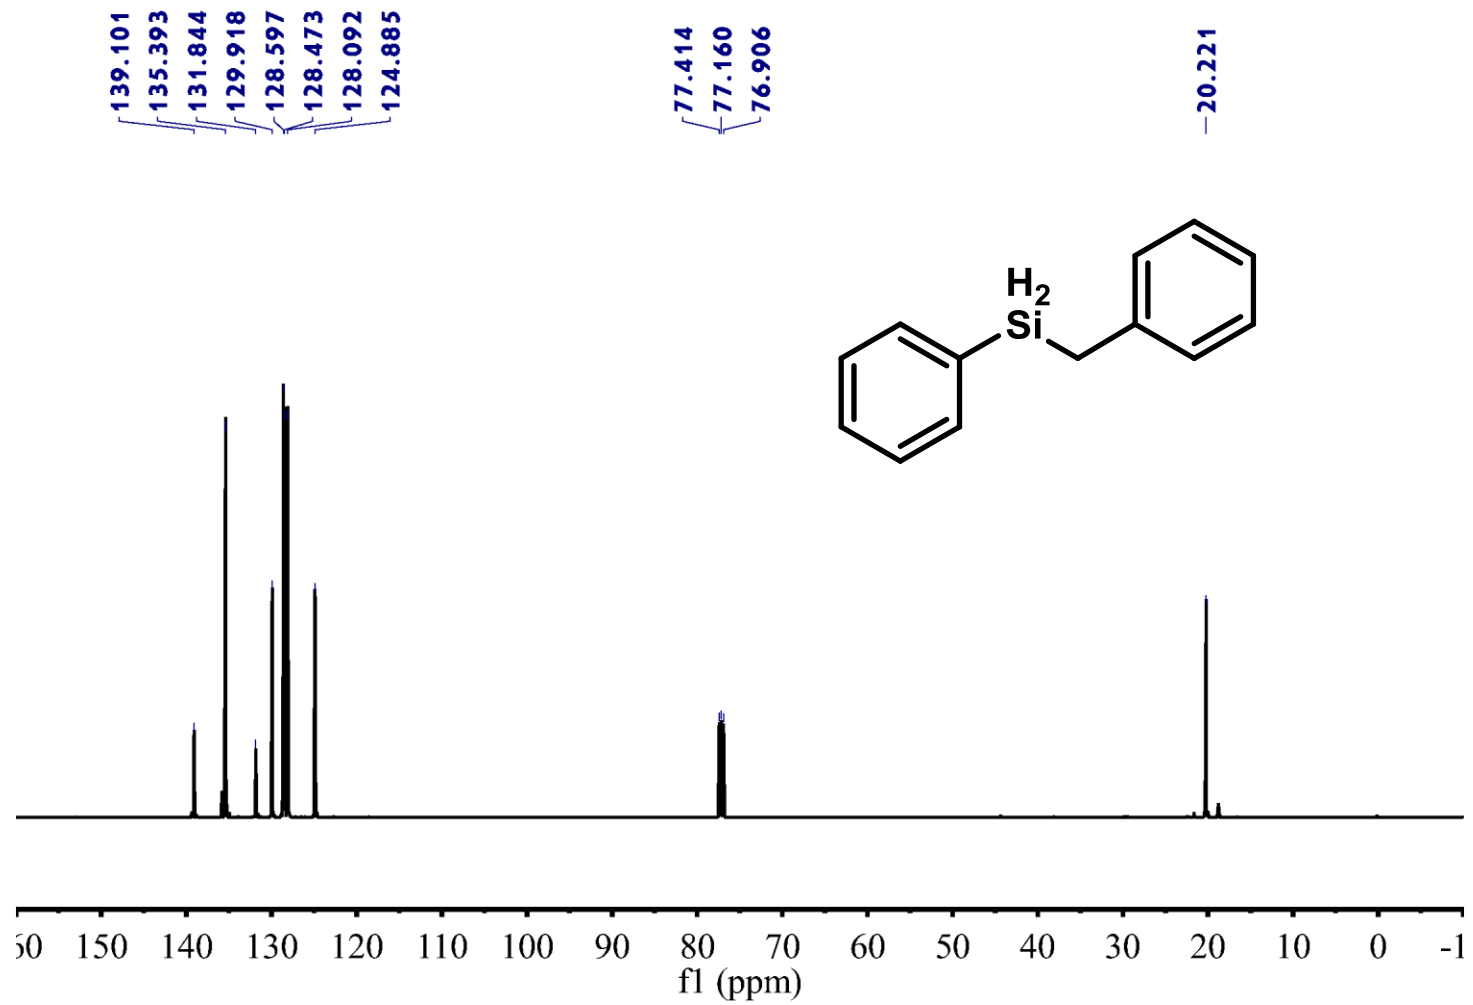

**Figure S70.**  $^{13}\text{C}\{^1\text{H}\}$  NMR spectrum of benzyl(phenyl)silane (125 MHz,  $\text{CDCl}_3$ , 25 °C).



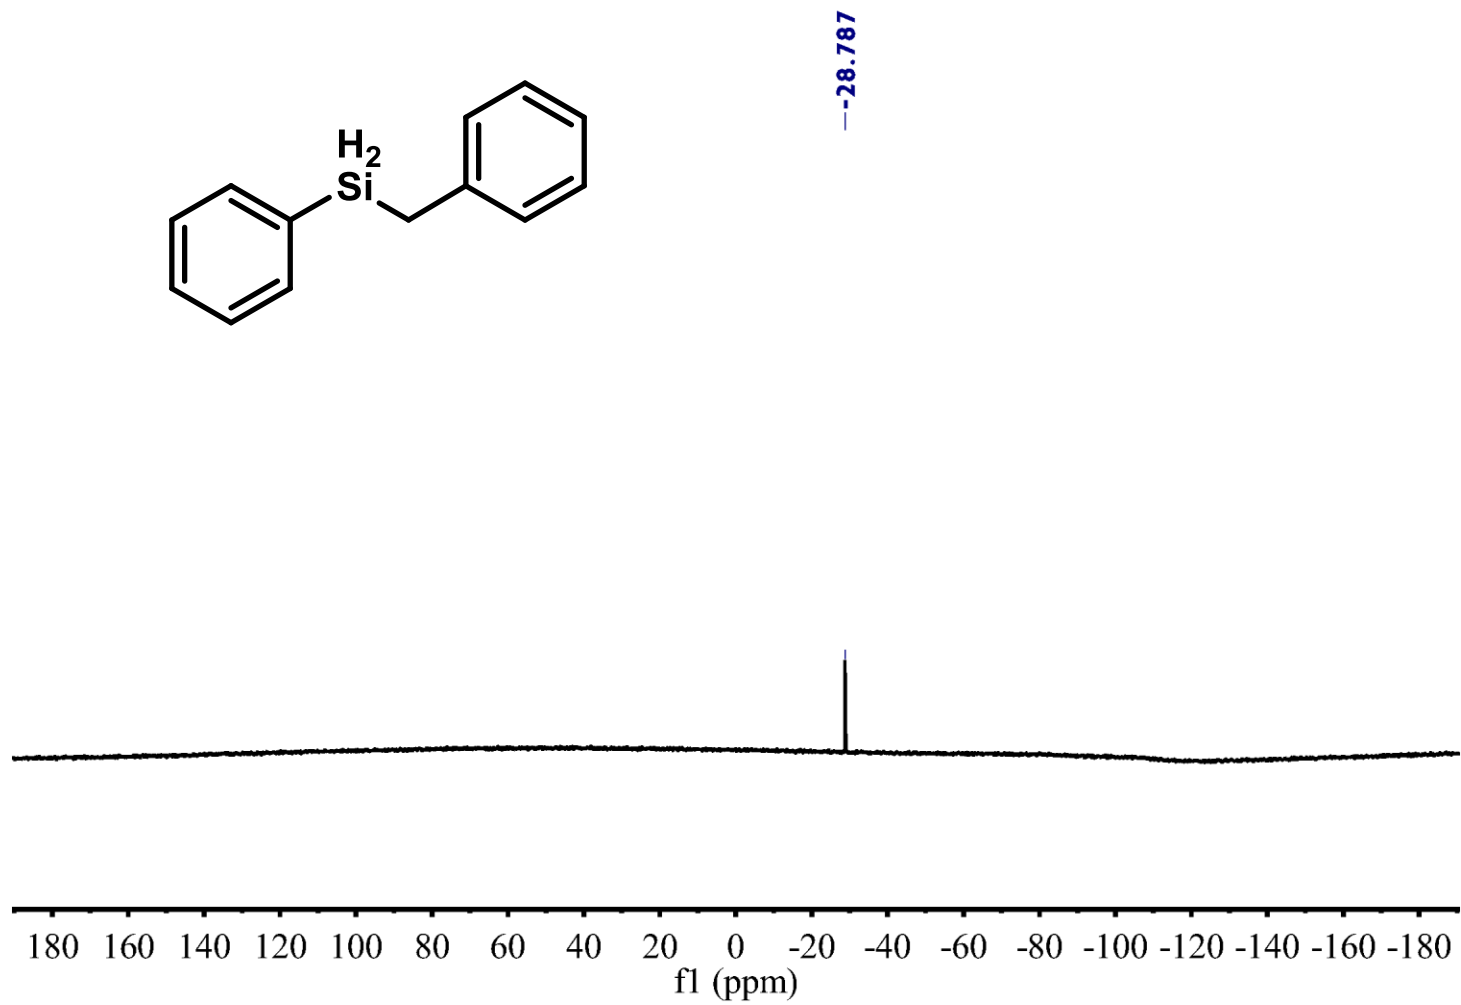

**Figure S71.**  $^{29}\text{Si}$  NMR spectrum of benzyl(phenyl)silane (119.19 MHz,  $\text{CDCl}_3$ , 25 °C).

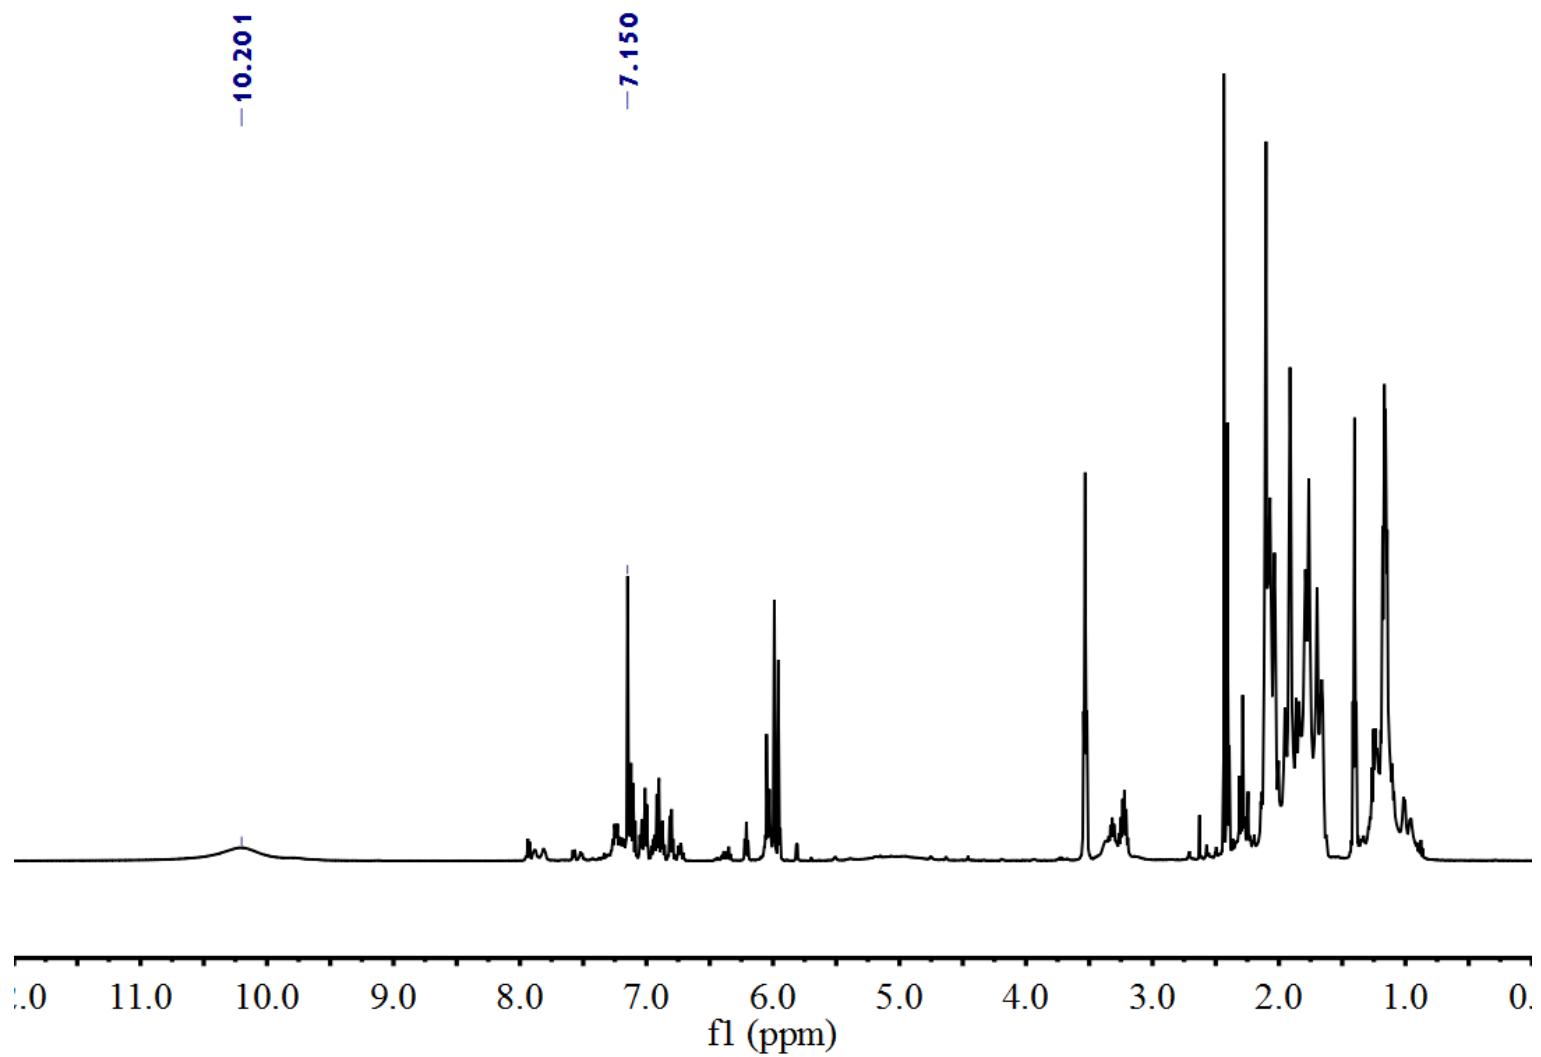

**Figure S72.**  $^1\text{H}$  NMR spectrum of stoichiometric reaction of complex **1** with  $\text{PhSiH}_3$  (500 MHz,  $\text{C}_6\text{D}_6$ , 25  $^\circ\text{C}$ ).

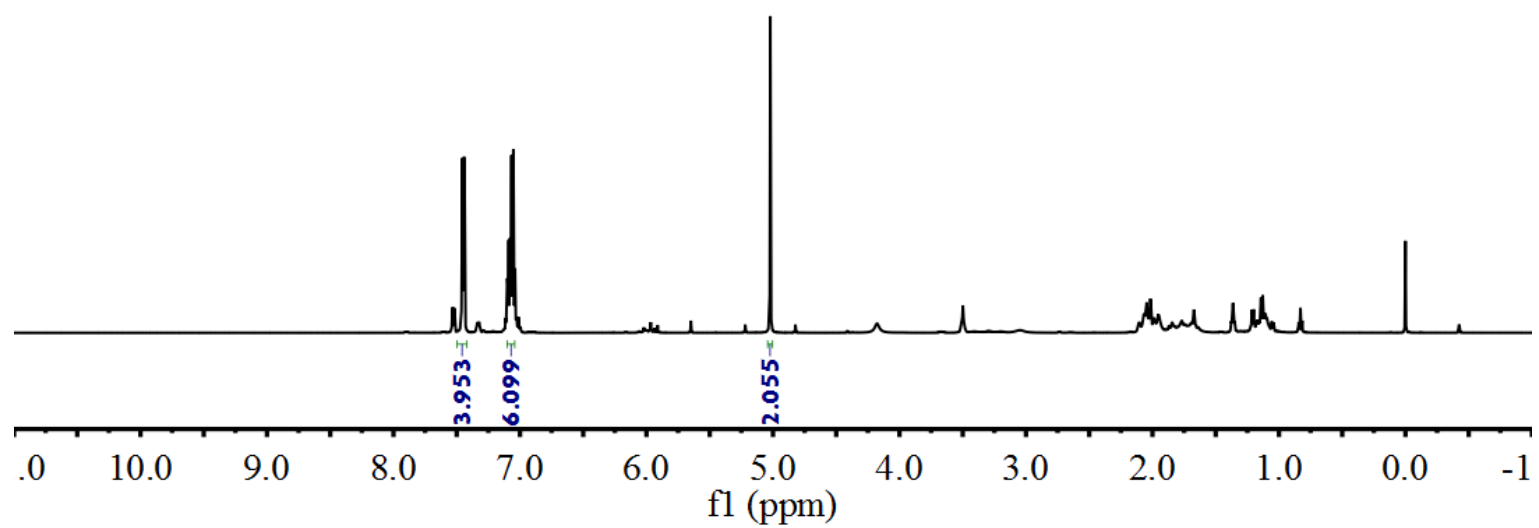

**Figure S73.**  $^1\text{H}$  NMR spectrum of the products of redistribution of  $\text{PhSiH}_3$  catalyzed by 2.5 mol% of **2** at r.t. in 10 min (500 MHz,  $\text{C}_6\text{D}_6$ , 25  $^\circ\text{C}$ ).
